# Supplementary material for: How prices and income influence global patterns in saturated fat intake by age, sex and world region: a cross-sectional analysis of 160 countries
Source: PubMed Central journal article supplement — BMJ Open. 2024 Jan 22;14(1):e074562. doi: 10.1136/bmjopen-2023-074562 (PMC10806819; doi:10.1136/bmjopen-2023-074562), 2024-01-22
Supplement: bmjopen-2023-074562.draft_revisions.pdf [file bmjopen-2023-074562.draft_revisions.pdf]

# BMJ Open

BMJ Open is committed to open peer review. As part of this commitment we make the peer review history of every article we publish publicly available.

When an article is published we post the peer reviewers' comments and the authors' responses online. We also post the versions of the paper that were used during peer review. These are the versions that the peer review comments apply to.

The versions of the paper that follow are the versions that were submitted during the peer review process. They are not the versions of record or the final published versions. They should not be cited or distributed as the published version of this manuscript.

BMJ Open is an open access journal and the full, final, typeset and author-corrected version of record of the manuscript is available on our site with no access controls, subscription charges or pay-per-view fees (<http://bmjopen.bmj.com>).

If you have any questions on BMJ Open's open peer review process please email [info.bmjopen@bmj.com](mailto:info.bmjopen@bmj.com)

# BMJ Open

## Examining the influence of price and income on global saturated fat intake: evidence from 160 countries

|                               |                                                                                                                                                                                                                                                                                                                                                                                                                                                                                                                                                                                                                                                                                                                                                                                                                                                   |
|-------------------------------|---------------------------------------------------------------------------------------------------------------------------------------------------------------------------------------------------------------------------------------------------------------------------------------------------------------------------------------------------------------------------------------------------------------------------------------------------------------------------------------------------------------------------------------------------------------------------------------------------------------------------------------------------------------------------------------------------------------------------------------------------------------------------------------------------------------------------------------------------|
| Journal:                      | <i>BMJ Open</i>                                                                                                                                                                                                                                                                                                                                                                                                                                                                                                                                                                                                                                                                                                                                                                                                                                   |
| Manuscript ID                 | bmjopen-2023-074562                                                                                                                                                                                                                                                                                                                                                                                                                                                                                                                                                                                                                                                                                                                                                                                                                               |
| Article Type:                 | Original research                                                                                                                                                                                                                                                                                                                                                                                                                                                                                                                                                                                                                                                                                                                                                                                                                                 |
| Date Submitted by the Author: | 10-Apr-2023                                                                                                                                                                                                                                                                                                                                                                                                                                                                                                                                                                                                                                                                                                                                                                                                                                       |
| Complete List of Authors:     | Ahles, Amelia; Texas A&M University System<br>MUHAMMAD, ANDREW; The University of Tennessee Knoxville Institute of Agriculture,<br>Yenerall, Jacqueline; The University of Tennessee Knoxville Institute of Agriculture<br>Reedy, Julia; Tufts University Friedman School of Nutrition Science and Policy<br>Shi, Peilin; Friedman School of Nutrition Science and Policy, Tufts University,<br>Zhang, Jianyi; Tufts University Friedman School of Nutrition Science and Policy<br>Cudhea, Frederick; Tufts University Friedman School of Nutrition Science and Policy,<br>Erndt-Marino, Josh; Tufts University Friedman School of Nutrition Science and Policy<br>Miller, Victoria ; Tufts University Friedman School of Nutrition Science and Policy,<br>Mozaffarian, Dariush; Tufts University Friedman School of Nutrition Science and Policy |
| Keywords:                     | HEALTH ECONOMICS, Decision Making, Obesity                                                                                                                                                                                                                                                                                                                                                                                                                                                                                                                                                                                                                                                                                                                                                                                                        |
|                               |                                                                                                                                                                                                                                                                                                                                                                                                                                                                                                                                                                                                                                                                                                                                                                                                                                                   |

SCHOLARONE™  
Manuscripts

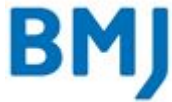

I, the Submitting Author has the right to grant and does grant on behalf of all authors of the Work (as defined in the below author licence), an exclusive licence and/or a non-exclusive licence for contributions from authors who are: i) UK Crown employees; ii) where BMJ has agreed a CC-BY licence shall apply, and/or iii) in accordance with the terms applicable for US Federal Government officers or employees acting as part of their official duties; on a worldwide, perpetual, irrevocable, royalty-free basis to BMJ Publishing Group Ltd ("BMJ") its licensees and where the relevant Journal is co-owned by BMJ to the co-owners of the Journal, to publish the Work in this journal and any other BMJ products and to exploit all rights, as set out in our [licence](#).

The Submitting Author accepts and understands that any supply made under these terms is made by BMJ to the Submitting Author unless you are acting as an employee on behalf of your employer or a postgraduate student of an affiliated institution which is paying any applicable article publishing charge ("APC") for Open Access articles. Where the Submitting Author wishes to make the Work available on an Open Access basis (and intends to pay the relevant APC), the terms of reuse of such Open Access shall be governed by a Creative Commons licence – details of these licences and which [Creative Commons](#) licence will apply to this Work are set out in our licence referred to above.

Other than as permitted in any relevant BMJ Author's Self Archiving Policies, I confirm this Work has not been accepted for publication elsewhere, is not being considered for publication elsewhere and does not duplicate material already published. I confirm all authors consent to publication of this Work and authorise the granting of this licence.

# 1 Examining the influence of price and income on global saturated fat intake: evidence from 2 160 countries

## 3 Abstract

## 4 Introduction

5  
6 When considering proposals to improve diets, it is important to understand how factors like  
7 price and income can affect saturated fat intake and demand. This is even more important when  
8 considering economic interventions on a global scale. In this study, we examine and estimate  
9 the influence of price and income on intake across 160 countries, by age and sex, and derive  
10 sensitivity measures (elasticities) that vary by age, sex, and geographic region.

## 11 Methods

12  
13 Secondary data were used for this analysis. Intake data by age, sex, and country were obtained  
14 from the 2018 Global Dietary Database. These data were then linked to global price data for  
15 select food groups from the World Bank International Comparison Program and income data  
16 from the World Development Indicators Databank (World Bank). We estimated intake  
17 responsiveness to income and prices, accounting for differences by world region, age, and sex.

## 18 Results

19  
20 Intake differences due to price were highly significant, with a one percent increase in price  
21 associated with lower SF intake (% energy/d) of about 4.3 percentage points. Results indicated  
22 that the highest price sensitivity was due to meat consumption. We also find significant  
23 differences across regions. In high-income countries, median (age 40) intake reductions were e  
24 1.4, 0.8, and 0.2 percentage points, given a one-percent increase in the price of meat, dairy, and  
25 oils and fats, respectively. Intake differences due to income were insignificant.

## 26 Conclusion

27  
28 The results of this study show heterogeneous associations among prices and intake within and  
29 across countries. Policymakers should consider these heterogenous effects as they address  
30 global nutrition and health challenges.

### What is already known on this topic

- It is generally understood that affordability is an important driver of food demand, underscoring the importance of income and prices in dietary choices. Research has confirmed significant associations among income, prices, and food demand. What is missing, however, is a better understanding of how price and income influence actual nutrient intake, particularly on a global scale, and how price and income relationships could vary by demographics within and across countries.

### What this study adds

- For the first time to our knowledge, we derive and compare global saturated fat intake elasticities by age and sex, characteristics which have been identified as likely to influence dietary responses to income or prices. Our study also provides a deeper understanding of how prices impact saturated fat intake across the full spectrum of countries from least developed to high-income economies.

### How this study might affect research, practice or policy

- This study shows that the economics of food demand and nutrient intake can be assessed on a global scale. Our results can inform the effectiveness of price intervention strategies and provide evidence of where intervention policies would have the largest impact.

## 58 INTRODUCTION

59 While nutritional guidelines call for reductions in saturated fat (SF), the literature is not clear  
60 and remains controversial on the causal link between SF intake and cardiovascular disease risk  
61 and other health-related outcomes.(1-3) Studies note that different food sources of SF may have  
62 different relationships with risk, for example with higher risk for red meats and their fats,  
63 generally neutral relationships for dairy foods and their fats, and protective associations for  
64 plant oils.(4) In addition, low SF intake has been associated with higher mortality risk in  
65 studies comprising mostly low- and middle-income countries, and very low SF intake is  
66 associated with higher risk of hemorrhagic stroke, potentially due to increased cerebral vascular  
67 fragility.(3, 4)

68 Governments and international organizations have proposed economic interventions to  
69 improve diets and health outcomes (5-8). In considering these proposals to improve diets, it is  
70 important to understand how factors like price and income can affect SF intake and demand.(6,  
71 9-11) Sensitivity to prices of SF-source foods could vary by per capita income, age, sex,  
72 educational attainment, etc. This relationship may also vary by world region, given differing  
73 cultural preferences and priorities around animal source foods. These factors could have  
74 important implications for policy interventions around animal source foods across countries and  
75 regions and in different population subgroups.(12) However, to-date, no evidence exists on the  
76 global income and price sensitivity of SF intake, nor potential variation by important  
77 demographic characteristics. Other than a few noted exceptions, global assessments of SF  
78 intake have been limited, particularly when considering price and income effects.(13, 14)

79 To help address these knowledge gaps, this investigation assessed how price and country  
80 income relate to SF intake. We used nationally representative intake estimates from the 2018

1  
2  
3 81 Global Dietary Database to estimate how per capita income and prices jointly relate to SF intake  
4  
5 82 by age and sex globally. Since nutrients are found in food, examinations of nutrient demand  
6  
7 83 must consider food source demand, with price and income as explanatory variables.(15-17)  
8  
9  
10 84 Using price and expenditure data from the World Bank International Comparison Program, we  
11  
12 85 constructed a global price series based on three food categories: meat, dairy, and oils and fats.  
13  
14 86 This series sufficiently explained SF intake differences across countries and allowed for  
15  
16 87 assessing the relationships of per capita income and price in each food category.  
17  
18  
19 88

## 21 89 **METHODS**

### 23 90 **Data and sources**

24  
25  
26 91 We used secondary data sources for the analysis. SF intake data measured in percent of total  
27  
28 92 energy per day (% energy/d) for a representative individual was obtained from the 2018 Global  
29  
30 93 Dietary Database (GDD). The GDD, maintained by the Global Nutrition and Policy  
31  
32 94 Consortium at Tufts Friedman School of Nutrition Science and Policy provides comprehensive  
33  
34 95 and comparable dietary intakes for major foods and nutrients in 185 countries and territories.  
35  
36 96 The GDD was developed using systematic searches of available survey data of individual-based  
37  
38 97 dietary intakes for key food and nutrient categories at the national and subnational level. GDD  
39  
40 98 intake estimates are based on the results of existing surveys (1,248 in total), representing 188  
41  
42 99 countries and approximately 99% of the global population. It is the first database to provide  
43  
44 100 estimates of daily consumption levels by food or nutrient category and contains representative  
45  
46 101 individual intake data by age (0-1 year, 1-2 years, 2-5 years, and then by increments of 5 years  
47  
48 102 to age 97.5) and sex. The GDD also disaggregates individual intakes by three education levels  
49  
50 103 and residence (urban and rural). The GDD data estimation process included extensive  
51  
52  
53  
54  
55  
56  
57  
58  
59  
60

1  
2  
3 104 communication with researchers and government authorities and large subnational surveys,  
4  
5 105 when other options were are unavailable (18, 19). For details on the GDD coverage, data  
6  
7  
8 106 methodology, and data collection, see:

9  
10 107 <https://www.globaldietarydatabase.org/methods/summary-methods-and-data-collection>.

11  
12 108 National food expenditure and price data from the World Bank International  
13  
14 109 Comparison Program (ICP) were used to derive a SF price series based on contributing food  
15  
16  
17 110 categories: meats, dairy, and oils and fats. The *meats* category in the ICP database is an  
18  
19 111 aggregation of the following: beef and veal; pork; lamb, mutton, and goat; poultry; and other  
20  
21 112 meats and meat preparations. *Dairy* – fresh milk; preserved milk and other milk products;  
22  
23 113 cheese and curd; and eggs and egg-based products. *Oils and fats* – butter and margarine; and  
24  
25 114 other edible oils and fats (20). Although saturated fat is readily found in a wide array of foods,  
26  
27 115 these categories have been identified as major contributors to saturated fatty acids in diets. In  
28  
29 116 the U.S., for instance, meats, dairy, and oils and fats accounts for over two-thirds of SF intake  
30  
31 117 (21). While other foods, such as sweet and savory snacks, may also contribute, global price  
32  
33 118 series for these categories are not widely available.

34  
35  
36  
37 119 The ICP is a global initiative that estimates purchasing power parities (PPPs) and price  
38  
39 120 level indices (PLIs) across countries, which allows for global comparisons of spending and  
40  
41 121 economic wellbeing. PPPs are spatial price deflators that make it possible to compare  
42  
43 122 expenditures across economies.(22) PLIs are PPPs standardized to a common currency  
44  
45 123 (generally the U.S Dollar) or indexed to a global average or base country.(23) The most recent  
46  
47 124 ICP data round (2017) included comparative prices and expenditure data from 176 participating  
48  
49 125 economies.(23)



1  
2  
3 126 For income, we used 2018 PPP-adjusted, gross domestic product (GDP) per capita from  
4  
5 127 the World Development Indicators (WDI) database. Because differences in currency values and  
6  
7 128 exchange rates do not always consistently reflect price-level differences across countries, PPP-  
8  
9  
10 129 adjusted GDP allowed for cross-country comparisons because overall price disparities across  
11  
12 130 countries are taken into account.(24)  
13  
14  
15  
16  
17  
18  
19  
20  
21  
22  
23  
24  
25  
26  
27  
28  
29  
30  
31  
32  
33  
34  
35  
36  
37  
38  
39  
40  
41  
42  
43  
44  
45  
46  
47  
48  
49  
50  
51  
52  
53  
54  
55  
56  
57  
58  
59  
60

For peer review only

1  
2  
3 131 The analysis was limited to the 160 countries represented in all three databases (GDD,  
4  
5 132 ICP, and WDI), which are listed in Supplementary Table 1 by geographic region (see the  
6  
7  
8 133 Supplemental Appendix): East Asia, Southeast Asia, and the Asian Pacific (Asia) (14  
9  
10 134 countries); Central and Eastern Europe and Central Asia (CEE) (27 countries); Latin America  
11  
12 135 and Caribbean (LAC) (29 countries); Middle East and North Africa (MENA) (17 countries);  
13  
14 136 South Asia (S-Asia) (7 countries); Sub-Saharan Africa (SSA) (43 countries), and High-  
15  
16 137 Income/Western Countries (HIC) (24 countries). HIC is an aggregation of high-income  
17  
18 138 countries in the Western hemisphere, Australia, and New Zealand, with the addition of a few  
19  
20 139 surrounding islands.

21  
22  
23  
24 140 See the Supplemental Appendix for a more detailed discussion of the price, expenditure,  
25  
26 141 and income data by geographic region.

27  
28  
29 142

### 30 31 143 **Patient and public involvement**

32  
33 144 We used secondary data for this study. All data are publicly available and did not require direct  
34  
35 145 patient involvement in the study design or implementation.

36  
37  
38 146

### 39 40 147 **Model and estimation**

41  
42 148 To estimate SF intake demand, we used a semi-log functional form that has been proven to be  
43  
44 149 consistent with economic theory and rational consumer behavior.(25, 26) Many studies have  
45  
46 150 used a double-log form.(27) However, a problem with the double-log form is that significant  
47  
48 151 intake differences across subgroups can be lost in log conversions. A semi-log relationship  
49  
50 152 allowed for a better assessment of subgroup effects on intake responsiveness. Also, it has been  
51  
52 153 shown that semi-log models contain the necessary information for obtaining, for instance,  
53  
54  
55  
56  
57  
58  
59  
60

1  
2  
3 154 reliable measures of consumer welfare and the underlying preference structure of  
4  
5 155 consumers.(25) Prior studies have also used a demand-system approach, primarily due to the  
6  
7 156 adding-up property when using expenditure data (i.e., expenditures on all food categories “add  
8  
9  
10 157 up” to total food expenditures), which results in the error terms being correlated across  
11  
12 158 equations specific to each food category. Since this relationship does not exist with individual  
13  
14  
15 159 intakes, particularly when the correspondence between purchases and intakes is not one to one,  
16  
17 160 we can estimate intake demand for a single food or nutrient category separately.(28, 29)

18  
19 161 Let  $q_{gC}$  represent the % energy/d from saturated fat for demographic subgroup  $g$  ( $g$ : sex  
20  
21 162 and age) in country  $C$  and let  $p_C$  represent the price level index for the contributing food  
22  
23 163 categories in country  $C$ . Let  $Y_C$  and  $P_C$  represent real per capita income and the food price level  
24  
25 164 index, respectively, in country  $C$ . Given these terms, the following model was used to estimate  
26  
27 165 the relationship between intake, income, and prices:

$$q_{gC} = \beta_0^* + \beta_1^* \ln(Y_C) + \beta_2^* \ln\left(\frac{p_C}{P_C}\right) + u_{gC}. \quad (1)$$

28  
29  
30  
31  
32  
33  
34  
35 166 The  $\beta_k^*$  terms [ $k = \{0,1,2\}$ ] are parameters to be estimated and  $u_{gC}$  is a random error  
36  
37 167 term. Note that the price term is defined by the price of contributing food categories ( $p_C$ )  
38  
39 168 relative to overall food prices ( $P_C$ ). Thus, the model discounts any price differences across  
40  
41  
42 169 countries due to differences in overall food prices and implicitly accounts for the cross-price  
43  
44 170 effects of other foods. For instance, if dairy prices were the same in two countries, but overall  
45  
46 171 food prices differed, intake would be greater in the country with the higher food-price level  
47  
48 172 since dairy is *relatively* cheaper when compared to food overall. Note that equation (1) does not  
49  
50 173 include higher order income and price effects (e.g., quadratic income and price-income  
51  
52 174 interactions). In preliminary analysis, these higher-order terms were highly insignificant, which  
53  
54  
55  
56  
57  
58  
59  
60

175 implied that price or income responsiveness did not depend on the level of per-capita income  
 176 level.

177 Using equation (1), we estimated intake demand using a procedure that allowed for error  
 178 correlations among observations from the same country (i.e., country-clustered errors).(30) To  
 179 account for differences in preferences across countries due to cultural differences or other  
 180 related factors, we included regional binary variables in the analysis (ASIA, CEE, LAC,  
 181 MENA, S-ASIA, and SSA). We accounted for age and sex by allowing these factors to have a  
 182 direct effect on intake, as well as an additional effect through income and prices. Thus, the beta  
 183 terms ( $\beta_k^*$ ) were expanded to account for age and sex interactions:  $\beta_k^* = f(\text{sex}, \text{age})\forall k$ .

184 Further disaggregations (education level and residence) were not considered due to estimation  
 185 concerns resulting from negligible differences in SF intake across these factors. Although we  
 186 used a single price index ( $p_C$ ) to represent the three food categories (meats, dairy, and oils and  
 187 fats), intake responsiveness with respect to the price of each food category were easily derived.  
 188 Defining the conditional expenditure share and price for the  $i$ th food category in country  $C$  as  
 189  $s_{iC}$  and  $p_{iC}$ , respectively,  $p_C$  is as follows:  $p_C = \sum_i s_{iC} p_{iC}$ . Thus, relationships between  $q_{gC}$  and  
 190  $p_{iC}$  were derived using the estimate on the price term in equation (1) ( $\beta_2^*$ ) and the conditional

191 expenditure share  $s_{iC}$  as follows:  $\frac{\partial q_{gC}}{\partial p_{iC}} = \frac{\partial q_{gC} \partial p_C}{\partial p_C \partial p_{iC}} = \frac{\beta_2^*}{p_C} s_{iC}$ .

192

## 193 RESULTS

### 194 Descriptive statistics and SF intake overview

195 Table 1 shows the descriptive statistics for the variables used in the model. Mean SF intake  
 196 across all observations was 10.3% energy/d and ranged from 2.39 to 27.28. PPP-adjust real

1  
2  
3  
4 197 GDP per capita ranged from \$780 to \$117,245 (mean = \$22,226). The deflated price index  $\left(\frac{p_c}{P_c}\right)$   
5  
6 198 ranged from 0.71 to 1.40 (mean = 1.00). Mean values for the region and sex variables reflect  
7  
8 199 the country and subgroup representation in the data.

10  
11 200 Figure 1 contains violin plots for SF intake by sex, age, and region based on all  
12  
13 201 observations ( $n = 7,040$ ). Violin plots use kernel densities to visualize the distribution of intake.  
14  
15 202 The width of the violin plot corresponded to the probability of an observation taking a specific  
16  
17 203 value of SF intake and the vertical black line in each violin plot corresponds to the median  
18  
19 204 value. In general, the violin plots showed that the distribution of SF is similar across age and  
20  
21 205 sex subgroups, although there was greater variation across regions. Additionally, the presence  
22  
23 206 of long right tails across most subgroups suggested the presence of outliers with very high  
24  
25 207 values of SF intake.

26  
27  
28  
29 208 While the median value for SF intake was around 10.60 % energy/d, there were notable  
30  
31 209 differences (Figure 1). Median SF intake was slightly higher in females (females = 10.88,  
32  
33 210 males=10.40). Across regions, median SF intake was lowest in S-Asia (6.42) and highest in  
34  
35 211 HIC (13.78). Overall, the maximum value for saturated fat intake occurred in the Philippines  
36  
37 212 (27.48) amongst female infants (< 1 year old), while the overall minimum occurred in Nepal  
38  
39 213 (2.39) amongst females between the ages of 20 and 25. Even within regions, notable  
40  
41 214 differences occurred. In HIC, for instance, intake ranged from a high of 23.02 % energy/d in  
42  
43 215 France amongst female infants to 9.45 % energy/d in Portugal amongst males, age 95 years and  
44  
45 216 older.

46  
47  
48  
49  
50 217

## 51 52 218 **Estimation results**

53  
54  
55  
56  
57  
58  
59  
60

1  
2  
3 219 We first estimated the model using intake values at the country level (i.e., intake averaged over  
4  
5 220 all demographic subgroups) ( $n = 160$ ) (Table 2). Since our explanatory variables (price and  
6  
7 221 income) were country specific and did not vary with demographic subgroups, it was useful to  
8  
9 222 examine the significance of price or income without age and sex differences. The country-level  
10  
11 223 analysis also revealed the importance of each variable in explaining global differences in SF  
12  
13 224 intake. For instance, Model 1 showed that regional differences accounted for a large share of  
14  
15 225 intake differences across countries (Adjusted  $R^2 = 0.39$ ). When regional differences were not  
16  
17 226 accounted for, both income ( $1.03, p < 0.01$ ) (Model 2) and price ( $-3.90, p < 0.05$ ) (Model 3)  
18  
19 227 were significant. When regional differences were accounted for (Model 4), price was still  
20  
21 228 significant ( $-4.33, p < 0.05$ ), but income was insignificant. The negative price estimate was  
22  
23 229 consistent with economic theory (higher prices being associated with lower intake) and  
24  
25 230 indicated that a unit increase in the log of price was associated with lower SF intake by 4.33  
26  
27 231 percentage points.  
28  
29  
30  
31  
32

33 232 Since the intake variable was measured as a percent, it is important to clarify the  
34  
35 233 difference between a percentage point change and percent change. For instance, intake falling  
36  
37 234 from 10.83 to 6.50 % energy/d, is a 4.33 percentage point decline, but a 40% decline:  $-4.33 \div$   
38  
39 235 10.83). This distinction is important when considering elasticity relationships where both intake  
40  
41 236 and prices are measured in percentage. Assuming mean intake (10.83 % energy/day) as the  
42  
43 237 base, intake falling by 4.33 percentage points or 40% given a unit change in the log of price (a  
44  
45 238 two-fold increase) suggested a price elasticity of about -0.40. That is, SF intake declines by  
46  
47 239 0.40% for every 1.0% increase in price, which indicates minimal price sensitivity and inelastic  
48  
49 240 demand. Note that this result is based on a price increase across all three food categories. As  
50  
51  
52  
53  
54  
55  
56  
57  
58  
59  
60

241 discussed later in this section, intake responsiveness to the price of a particular food category  
242 (e.g., dairy) was smaller.

243 Estimation results for the full model (Model 4) are reported in Table 3. Other than  
244 ASIA, SF intake was significantly lower in all regions relative to HIC intake. Intake also  
245 decreased with higher age ( $-0.10, p < 0.01$ ), but this effect was less significant with older adults.  
246 Results (Model 4) indicated a price effect of  $-7.16 (p < 0.01)$ , where the magnitude became  
247 smaller with age ( $0.20, p < 0.01$ ), but then increased for older populations. There was no  
248 significant difference in the price effect by sex – and like the country-level analysis – the  
249 income effect on intake was insignificant when regional differences were considered.  
250 Consequently, we did not examine income effects in detail and the price-specific measures that  
251 follow are not specific to sex.

### 253 **Intake responsiveness and food prices**

254 Using the country-level estimates from Table 2, we derived measures of aggregate intake  
255 change with respect to category-specific prices (meat, dairy, and oils and fats) (Figure 2). A  
256 price increase in the meat category resulted in the largest intake decrease:  $-2.47$  percentage  
257 points from a two-fold increase in price (IQR:  $-2.29$  to  $-2.78$ ). Assuming mean intake as the  
258 base, this implied a price elasticity of about  $-0.23$  (i.e., a  $0.23\%$  decline for every  $1.0\%$  increase  
259 in meat prices). Dairy had the next highest intake decrease ( $-1.30$  percentage points and IQR:  
260  $-1.01$  to  $-1.56$ ), implying a price elasticity of  $-0.12$ . The results for oils and fats implied the  
261 lowest intake decrease ( $-0.55$  percentage points and IQR:  $-0.29$  to  $-0.65$ ) and a price elasticity of  
262 about  $-0.06$ .

1  
2  
3 263 Using the estimates from Table 3, we assessed intake responsive by food category, age,  
4  
5 264 and region (See Figure 3). Across regions, meat prices resulted in the largest variation in SF  
6  
7 265 intake, with S-Asia being the only exception. In HIC, for instance, median SF intake reductions  
8  
9 266 at age 40 were 1.37, 0.78, and 0.15 percentage points, for 1% higher prices of meat, dairy, and  
10  
11 267 oils and fats, respectively. In contrast, intake reductions in S-Asia at age 40 were highest for  
12  
13 268 dairy (1.14 percentage points) followed by meat (0.62 percentage points) and oils and fats (0.48  
14  
15 269 percentage points). However, the IQR overlap for meat and dairy in S-Asia suggested that the  
16  
17 270 two categories were not significantly different.

18  
19 271 Across regions, there were key differences in intake responsiveness with respect to price  
20  
21 272 changes. In HIC, there was no IQR overlap, suggesting significantly higher intake  
22  
23 273 responsiveness to meat prices when compared to dairy, and dairy compared to oils and fats.  
24  
25 274 Similar patterns were observed for CEE, LAC, and MENA. In SSA, however, intake changes  
26  
27 275 from meat prices were significantly larger when compared dairy or oils and fats, but the  
28  
29 276 estimates for dairy and oils and fats prices show considerable IQR overlap.

30  
31 277 Results also indicated that middle-aged groups (age 40-60 years) were the least sensitive  
32  
33 278 to price changes. This was consistent with expectations as the middle-aged often have higher  
34  
35 279 incomes and may be less sensitive to price changes. Based on the “All Countries” estimates  
36  
37 280 (upper left panel), the median intake response from a two-fold increase in meat prices was -2.10  
38  
39 281 percentage points (age 20), responsiveness then decreased to -1.32 percentage points by age 50,  
40  
41 282 and then increased to -2.71 percentage points by age 80. There was a similar pattern for dairy  
42  
43 283 and oils and fats, but the differences between age groups were not as large.

44  
45 284

## 46 47 285 **DISCUSSION**



1  
2  
3 286 This investigation provides evidence on how differences in income and food prices might  
4  
5 287 jointly influence SF consumption by sex and age across the spectrum of rich and poor countries.  
6  
7 288 Both the country-level and disaggregated (age and sex) analysis indicated that intake differences  
8  
9 289 due to income were insignificant. These results suggest that intake differences across countries  
10  
11 290 are better explained by regional dissimilarities and not economic wellbeing as measured by per-  
12  
13 291 capita income. In contrast, differences due to food prices were highly significant. Globally, a  
14  
15 292 one-percent increase in prices of meat, dairy, and oils and fats was estimated to decrease SF  
16  
17 293 intake by about 0.40%, and by 0.23%, 0.12%, and 0.06%, respectively. Across regions, meat-  
18  
19 294 price sensitivity of SF intake was relatively high, except for S-Asia where dairy price sensitivity  
20  
21 295 of SF intake was higher. Within regions and by age, price sensitivity was lowest among  
22  
23 296 middle-aged adults.

24  
25  
26  
27  
28 297 The higher sensitivity of SF intake to price changes in meat consumption suggests that  
29  
30 298 fiscal policies focused on a reducing SF intake would be more effective through meat-price  
31  
32 299 interventions. That said, the magnitudes of price sensitivity were small, indicating relatively  
33  
34 300 inelastic demand. Thus, high taxes would be needed to reduce intake: for example, global  
35  
36 301 findings suggest that a two-fold increase in meat prices (i.e., a 100% tax) is associated with  
37  
38 302 decreased intake of only 2.47 percentage points. Our results are consistent with previous  
39  
40 303 findings. Research has shown that fat taxes in Denmark, Hungary, and France had small and  
41  
42 304 ambiguous effects on demand.(31, 32) A similar outcome was observed from the Danish fat tax  
43  
44 305 experience that targeted dairy and vegetable fat sources.(33)

45  
46  
47 306 The findings in this study can help to inform strategies that counter worsening diets.  
48  
49 307 However, our modeling cannot prove causality of price changes on intake, and thus our findings  
50  
51 308 should be interpreted cautiously when informing interventions and evaluations. Furthermore,  
52  
53  
54  
55  
56  
57  
58  
59  
60

1  
2  
3 309 the invariability of price and income across demographic subgroups ignores differences within  
4  
5 310 countries and may have affected results, although we address this issue, in part, with age and  
6  
7 311 sex variable interactions. That said, the benefit of our analysis is the country coverage. While  
8  
9 312 relationships between income, prices, and food choice have been studied, combining GDD,  
10  
11 313 World Bank, and ICP data allowed for a global coverage rarely seen in food and nutrition  
12  
13 314 research, allowing for comparisons across individuals in rich and poor countries and an  
14  
15 315 examination of intake responsiveness by age and sex.(28, 29)  
16  
17  
18  
19 316

## 21 317 **CONCLUSION**

24 318 Our results provide novel global evidence on how income and prices influence SF intake by  
25  
26 319 region, age, and sex. Our results confirm that the effectiveness of price interventions would be  
27  
28 320 limited in most countries but provide evidence where interventions would be most effective if  
29  
30 321 implemented (meat versus dairy or oils and fats; youth, young adults, and the elderly). These  
31  
32 322 observed relationships can assist policymakers as they consider how pricing policies can be  
33  
34 323 leveraged to tackle nutrition challenges.  
35  
36  
37  
38  
39  
40  
41  
42  
43  
44  
45  
46  
47  
48  
49  
50  
51  
52  
53  
54  
55  
56  
57  
58  
59  
60

324 **Table 1. Descriptive statistics for study variables**

| Variable                  | Measure           | Mean     | Std. Dev. | Min   | Max       |
|---------------------------|-------------------|----------|-----------|-------|-----------|
| SF intake                 | % energy/d        | 10.83    | 3.09      | 2.39  | 27.48     |
| Female                    | binary            | 0.50     | 0.50      | 0     | 1         |
| Age                       | 5-year intervals* | 45.6     | 30.83     | 1     | 98        |
| ASIA                      | binary            | 0.09     | 0.29      | 0     | 1         |
| CEE                       | binary            | 0.17     | 0.37      | 0     | 1         |
| HIC                       | binary            | 0.15     | 0.36      | 0     | 1         |
| LAC                       | binary            | 0.18     | 0.39      | 0     | 1         |
| MENA                      | binary            | 0.10     | 0.30      | 0     | 1         |
| S-ASIA                    | binary            | 0.04     | 0.20      | 0     | 1         |
| SSA                       | binary            | 0.27     | 0.44      | 0     | 1         |
| Real GDP per capita (PPP) | \$/person         | \$22,226 | \$21,646  | \$780 | \$117,245 |
| Deflated price            | index (US=1)      | 1.00     | 0.12      | 0.71  | 1.40      |

SF is saturated fat. Note that  $n = 7,040$  (160 countries  $\times$  44 demographic subgroups);  $n = 160$  for the GDP and price index. East and Southeast Asia (ASIA), Central and Eastern Europe and Central Asia (CEE), Latin America and Caribbean (LAC), Middle East and North Africa (MENA), South Asia (S-ASIA), Sub-Saharan Africa (SSA), and High-Income Countries/Rest of World (HIC). PPP is purchasing power parity.

325

326 **Table 2. Saturated fat intake estimates using country level data ( $n = 160$ )**

|                         | Model 1         | Model 2        | Model 3         | Model 4         |
|-------------------------|-----------------|----------------|-----------------|-----------------|
| Constant                | 13.66 (0.46)*** | 1.03 (1.75)    | 10.81 (0.23)*** | 12.05 (2.87)*** |
| ASIA                    | -1.19 (0.76)    |                |                 | -0.66 (0.81)    |
| CEE                     | -1.36 (0.63)**  |                |                 | -1.16 (0.67)*   |
| LAC                     | -4.07 (0.62)*** |                |                 | -4.26 (0.74)*** |
| MENA                    | -3.43 (0.73)*** |                |                 | -2.85 (0.77)*** |
| S-ASIA                  | -7.41 (0.97)*** |                |                 | -6.34 (1.10)*** |
| SSA                     | -4.07 (0.58)*** |                |                 | -3.65 (0.90)*** |
| ln(Y)                   |                 | 1.03 (0.18)*** |                 | 0.14 (0.26)     |
| ln(P)                   |                 |                | -3.90 (1.94)**  | -4.33 (1.89)**  |
| Adjusted R <sup>2</sup> | 0.39            | 0.16           | 0.02            | 0.41            |

327  
328  
329  
330  
331  
332  
333  
334  
335  
336  
337  
338  
339  
340  
341  
342  
343  
344  
345  
346  
347  
348  
349  
350  
351  
352  
353  
354  
355  
356  
357  
358  
359  
360

Dependent variable is saturated fat intake measured in % energy/d. Robust standard errors are in (parenthesis). \* $p \leq 0.10$ ; \*\* $p \leq 0.05$ ; \*\*\* $p \leq 0.01$ . East and Southeast Asia (ASIA), Central and Eastern Europe and Central Asia (CEE), Latin America and Caribbean (LAC), Middle East and North Africa (MENA), South Asia (S-ASIA), and Sub-Saharan Africa (SSA). Y is real GDP per capita, purchasing-power-parity adjusted. P is an inflation adjusted price index for meats, dairy products and eggs, and oils and fats.

328 **Table 3 Saturated fat intake estimates using country and demographic (sex and age) level**  
 329 **data (n = 7,040)**

|                          | Model 1         | Model 2          | Model 3         | Model 4         |
|--------------------------|-----------------|------------------|-----------------|-----------------|
| Constant                 | 14.64 (0.39)*** | 2.81 (1.73)      | 12.44 (2.89)*** | 12.01 (2.90)*** |
| ASIA                     | -2.20 (1.14)*   |                  | -1.61 (1.12)    | -1.61 (1.12)    |
| CEE                      | -1.94 (0.48)*** |                  | -1.68 (0.51)*** | -1.68 (0.51)*** |
| LAC                      | -3.97 (0.49)*** |                  | -4.09 (0.65)*** | -4.09 (0.65)*** |
| MENA                     | -3.98 (0.52)*** |                  | -3.35 (0.55)*** | -3.35 (0.55)*** |
| S-ASIA                   | -7.26 (1.00)*** |                  | -6.08 (1.08)*** | -6.08 (1.08)*** |
| SSA                      | -4.03 (0.49)*** |                  | -3.47 (0.81)*** | -3.47 (0.81)*** |
| Female                   | 0.48 (0.04)***  | 0.48 (0.04)***   | 0.48 (0.04)***  | 0.06 (0.31)     |
| Age                      | -0.04 (0.01)*** | -0.04 (0.008)*** | -0.04 (0.01)*** | -0.10 (0.04)*** |
| Age <sup>2</sup>         | 0.00 (0.00)***  | 0.00 (0.00)***   | 0.00 (0.00)***  | 0.00 (0.00)***  |
| ln(Y)                    |                 | 0.93 (0.18)***   | 0.19 (0.26)     | 0.24 (0.27)     |
| Female × ln(Y)           |                 |                  |                 | 0.04 (0.04)     |
| Age × ln(Y)              |                 |                  |                 | 0.01 (0.00)     |
| Age <sup>2</sup> × ln(Y) |                 |                  |                 | 0.00 (0.00)***  |
| ln(P)                    |                 | -3.73 (1.59)***  | -4.32 (1.88)**  | -7.16 (2.29)*** |
| Female × ln(P)           |                 |                  |                 | -0.13 (0.14)    |
| Age × ln(P)              |                 |                  |                 | 0.20 (0.06)***  |
| Age <sup>2</sup> × ln(P) |                 |                  |                 | 0.00 (0.00)***  |
| Adjusted R <sup>2</sup>  | 0.34            | 0.18             | 0.36            | 0.37            |

Dependent variable is saturated fat intake in % energy/d. Robust standard errors (clustered by country) are in (parenthesis). \* $p \leq 0.10$ ; \*\* $p \leq 0.05$ ; \*\*\* $p \leq 0.01$ . East and Southeast Asia (ASIA), Central and Eastern Europe (CEE), Latin America and Caribbean (LAC), Middle East and North Africa (MENA), South Asia (S-ASIA), and Sub-Saharan Africa (SSA). Y is real GDP per capita, purchasing-power-parity adjusted. P is an inflation adjusted price index for meats, dairy products and eggs, and oils and fats.

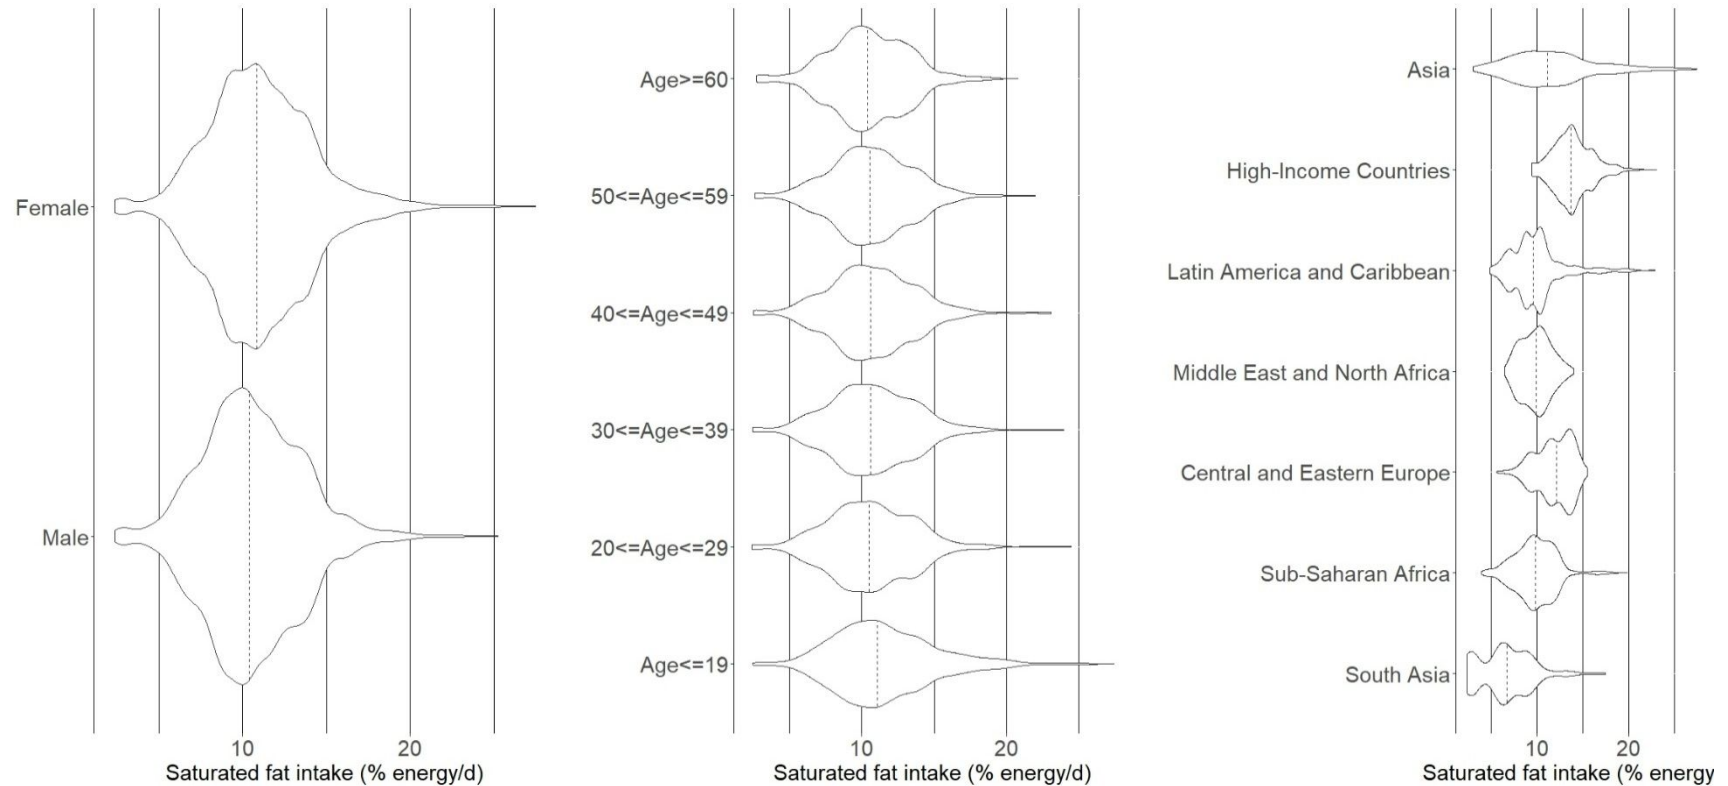

**Figure 1. Comparison of percentage energy from saturated fat among individuals in sex, age, and country-specific strata globally and across world regions.** Note that  $n = 7,040$  (160 countries  $\times$  44 demographic subgroups). Female  $n = 3,520$ ; male  $n = 3,520$ .

Age categories: Age  $\leq 19$   $n = 1,920$ ; Age  $\geq 60$   $n = 2,560$ ; for all other age groups  $n = 640$ ; Regions: South Asia  $n = 308$ ; Sub-Saharan Africa  $n = 1,892$ ; Central and Eastern Europe  $n = 1,188$ ; Middle East and North Africa  $n = 704$ ; Latin America and Caribbean  $n = 1,276$ ; High-Income Countries  $n = 1,056$ ; Asia  $n = 616$ .

Source: Global Dietary Database, 2018.

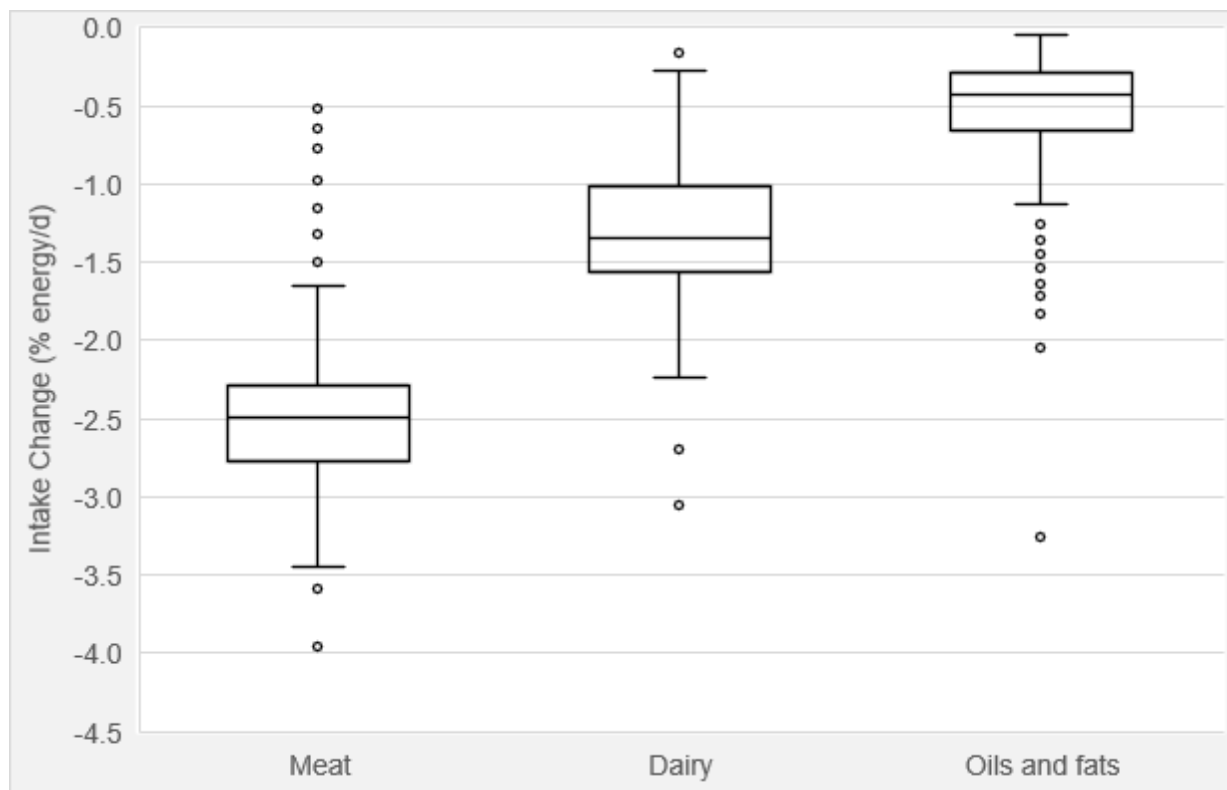

**Figure 2. Change in saturated fat intake when prices double for each food category.** Intake change values measure the change in % energy/d from saturated fat. Boxes denote the median value and IQR, error bars are min and max values, and data points are outliers.

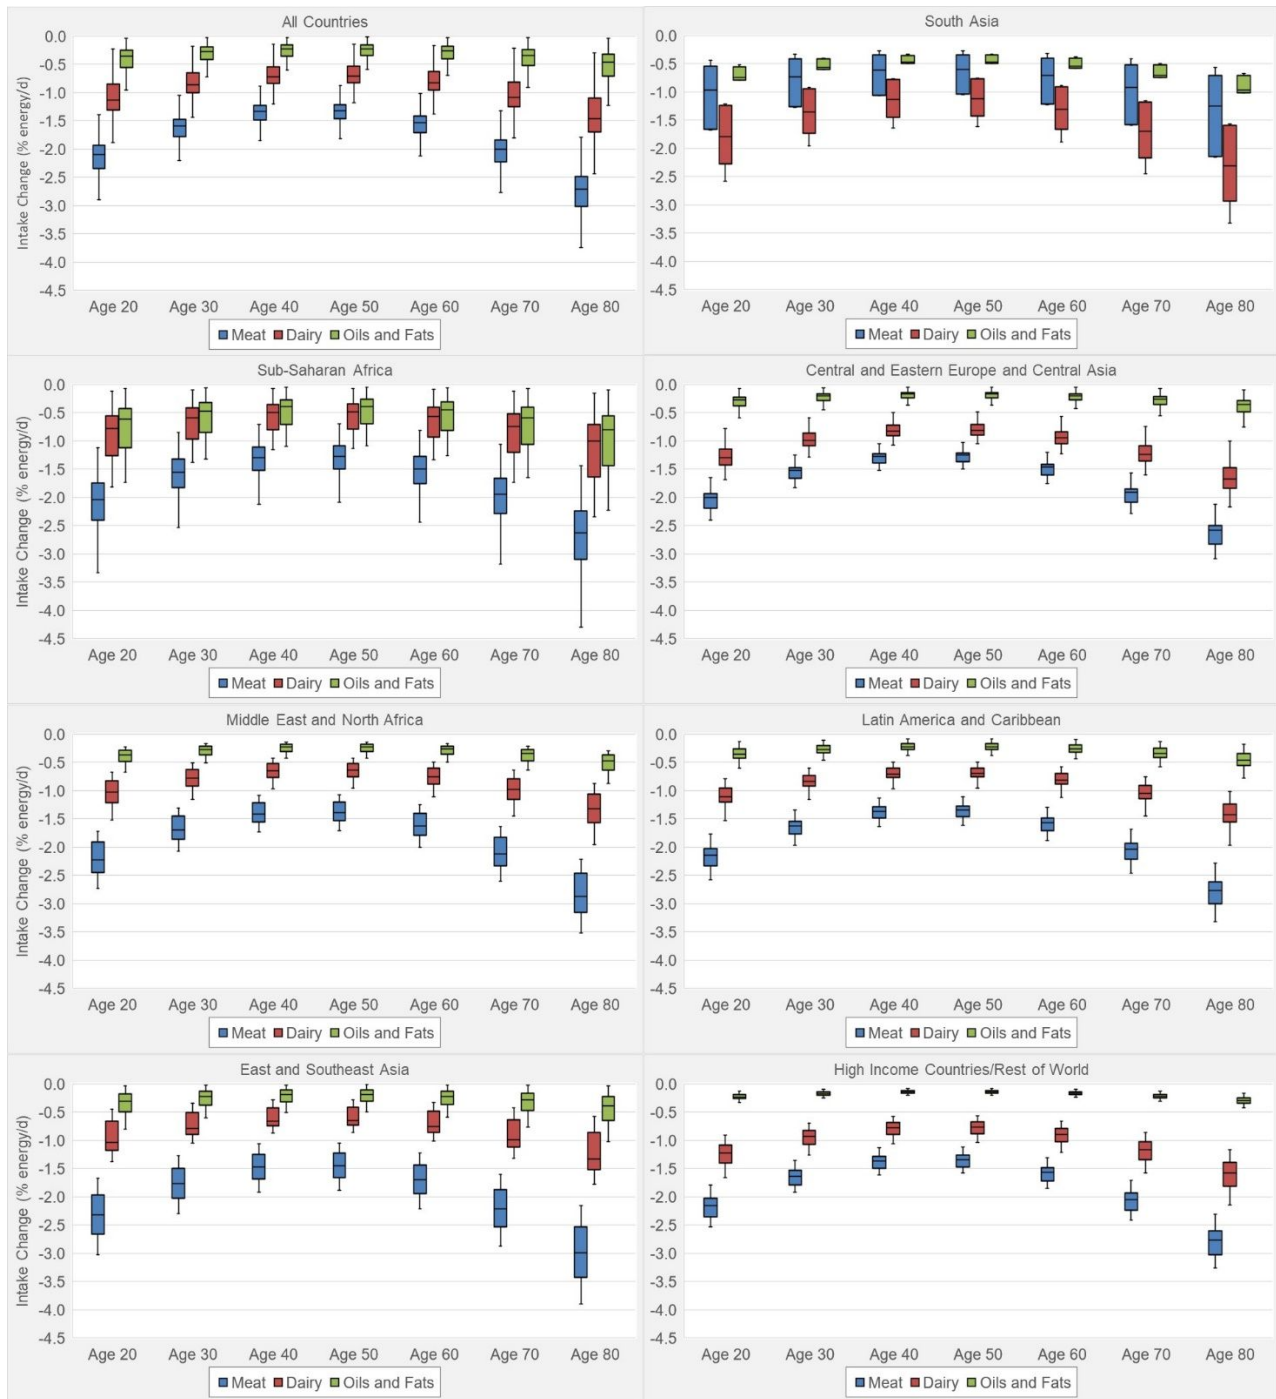

**Figure 3. Change in saturated fat intake when prices double for each food category by region and age.** Intake change values measure the change in % energy/d from saturated fat. Boxes denote the median value and IQR and error bars are min and max values.



## References

1. Forouhi NG, Krauss RM, Taubes G, Willett W. Dietary fat and cardiometabolic health: evidence, controversies, and consensus for guidance. *BMJ*. 2018;361.
2. Yu E, Hu FB. Dairy Products, Dairy Fatty Acids, and the Prevention of Cardiometabolic Disease: a Review of Recent Evidence. *Curr Atheroscler Rep*. 2018;20(5):24.
3. Siri-Tarino PW, Sun Q, Hu FB, Krauss RM. Meta-analysis of prospective cohort studies evaluating the association of saturated fat with cardiovascular disease. *The American Journal of Clinical Nutrition*. 2010;91(3):535-46.
4. Dehghan M, Mente A, Zhang X, Swaminathan S, Li W, Mohan V, et al. Associations of fats and carbohydrate intake with cardiovascular disease and mortality in 18 countries from five continents (PURE): a prospective cohort study. *The Lancet*. 2017;390(10107):2050-62.
5. Khan R, Misra K, Singh V. Will a Fat Tax Work? *Marketing Sci*. 2016;35(1):10-26.
6. Powell LM, Chaloupka FJ. Food Prices and Obesity: Evidence and Policy Implications for Taxes and Subsidies. *The Milbank Quarterly*. 2009;87(1):229-57.
7. Powell LM, Chriqui JF, Wada R, Chaloupka FJ. Assessing the potential effectiveness of food and beverage taxes and subsidies for improving public health: a systematic review of prices, demand and body weight outcomes. *Obes Rev*. 2013;14(2):110-28.
8. World Health Organization. Fiscal Policies for Diet and the Prevention of Noncommunicable Diseases. Technical Meeting Report. Geneva, Switzerland: World Health Organization; 2016.
9. Andreyeva T, Chaloupka FJ, Brownell KD. Estimating the potential of taxes on sugar-sweetened beverages to reduce consumption and generate revenue. *Prev Med*. 2011;52(6):413-6.
10. Andreyeva T, Long MW, Brownell KD. The impact of food prices on consumption: a systematic review of research on the price elasticity of demand for food. *Am J Public Health*. 2010;100(2):216-22.
11. Blaylock J, Smallwood D, Kassel K, Variyam J, Aldrich L. Economics, food choices, and nutrition. *Food Policy*. 1999;24(2-3):269-86.
12. Muhammad A, Seale JL, Meade B, Regmi A. International evidence on food consumption patterns: an update using 2005 international comparison program data. Washington, D.C.: Economic Research Service, USDA; 2011. Report No.: 1929.
13. Elmadfa I, Kornsteiner M. Dietary Fat Intake – A Global Perspective. *Ann Nutr Metab*. 2009;54(suppl 1)(Suppl. 1):8-14.
14. Micha R, Khatibzadeh S, Shi P, Fahimi S, Lim S, Andrews KG, et al. Global, regional, and national consumption levels of dietary fats and oils in 1990 and 2010: a systematic analysis

1  
2  
3 including 266 country-specific nutrition surveys. *BMJ : British Medical Journal*.  
4 2014;348:g2272.  
5

- 6  
7 15. Behrman JR, Wolfe BL. More evidence on nutrition demand: Income seems overrated  
8 and women's schooling underemphasized. *J Devel Econ*. 1984;14(1):105-28.  
9
- 10 16. Huang KS. Nutrient Elasticities in a Complete Food Demand System. *Amer J Agr Econ*.  
11 1996;78(1):21-9.  
12
- 13 17. Lancaster KJ. A New Approach to Consumer Theory. *J Polit Economy*. 1966;74(2):132.  
14
- 15 18. Khatibzadeh S, Saheb Kashaf M, Micha R, Fahimi S, Shi P, Elmadfa I, et al. A global  
16 database of food and nutrient consumption. *Bull World Health Organ*. 2016;94(12):931-4.  
17
- 18 19. Miller V, Reedy J, Cudhea F, Zhang J, Shi P, Erndt-Marino J, et al. Global, regional, and  
19 national consumption of animal-source foods between 1990 and 2018: findings from the Global  
20 Dietary Database. *Lancet Planet Health*. 2022;6(3):e243-e56.  
21
- 22 20. World Bank. Purchasing Power Parities and the Size of World Economies : Results from  
23 the 2017 International Comparison Program. Washington, DC: World Bank Group; 2020.  
24
- 25 21. Huth PJ, Fulgoni VL, Keast DR, Park K, Auestad N. Major food sources of calories,  
26 added sugars, and saturated fat and their contribution to essential nutrient intakes in the U.S. diet:  
27 data from the national health and nutrition examination survey (2003–2006). *Nutr J*.  
28 2013;12(1):116.  
29
- 30 22. World B. Purchasing Power Parities and the Real Size of World Economies: A  
31 Comprehensive Report of the 2011 International Comparison Program. World Bank. 2015.  
32
- 33 23. World B. Purchasing Power Parities for Policy Making: A Visual Guide to Using Data  
34 from the International Comparison Program. Washington, DC: World Bank; 2021 2021/06/10/.  
35
- 36 24. World B. World Development Indicators 2010. Washington DC: World Bank; 2010  
37 2010.  
38
- 39 25. LaFrance JT. Incomplete demand systems and semilogarithmic demand models.  
40 *Australian J Agr Econ*. 1990;34(2):118-31.  
41
- 42 26. von Haefen RH. A complete characterization of the linear, log-linear, and semi-log  
43 incomplete demand system models. *J Agr Resource Econ*. 2002;27(2):281-319.  
44
- 45 27. Sahn DE. The Effect of Price and Income Changes on Food-Energy Intake in Sri Lanka.  
46 *Economic Development and Cultural Change*. 1988;36(2):315-40.  
47
- 48 28. Muhammad A, D'Souza A, Meade B, Micha R, Mozaffarian D. How income and food  
49 prices influence global dietary intakes by age and sex: evidence from 164 countries. *BMJ Glob*  
50 *Health*. 2017;2(3):e000184.  
51  
52  
53  
54  
55  
56  
57  
58  
59  
60

- 1  
2  
3 29. Muhammad A, Meade B, Marquardt DR, Mozaffarian D. Global patterns in price  
4 elasticities of sugar-sweetened beverage intake and potential effectiveness of tax policy: a cross-  
5 sectional study of 164 countries by sex, age and global-income decile. *BMJ Open*.  
6 2019;9(8):e026390.  
7  
8  
9 30. Cameron AC, Trivedi PK. *Microeconometrics: Methods and Applications*. Cambridge:  
10 Cambridge University Press; 2005.  
11  
12 31. Allais O, Bertail P, Nichèle V. The Effects of a Fat Tax on French Households'  
13 Purchases: A Nutritional Approach. *Amer J Agr Econ*. 2010;92(1):228-45.  
14  
15 32. Smed S, Scarborough P, Rayner M, Jensen JD. The effects of the Danish saturated fat tax  
16 on food and nutrient intake and modelled health outcomes: an econometric and comparative risk  
17 assessment evaluation. *Eur J Clin Nutr*. 2016;70(6):681-6.  
18  
19  
20 33. Vallgård S, Holm L, Jensen JD. The Danish tax on saturated fat: why it did not survive.  
21 *Eur J Clin Nutr*. 2015;69(2):223-6.  
22  
23  
24  
25  
26  
27  
28  
29  
30  
31  
32  
33  
34  
35  
36  
37  
38  
39  
40  
41  
42  
43  
44  
45  
46  
47  
48  
49  
50  
51  
52  
53  
54  
55  
56  
57  
58  
59  
60

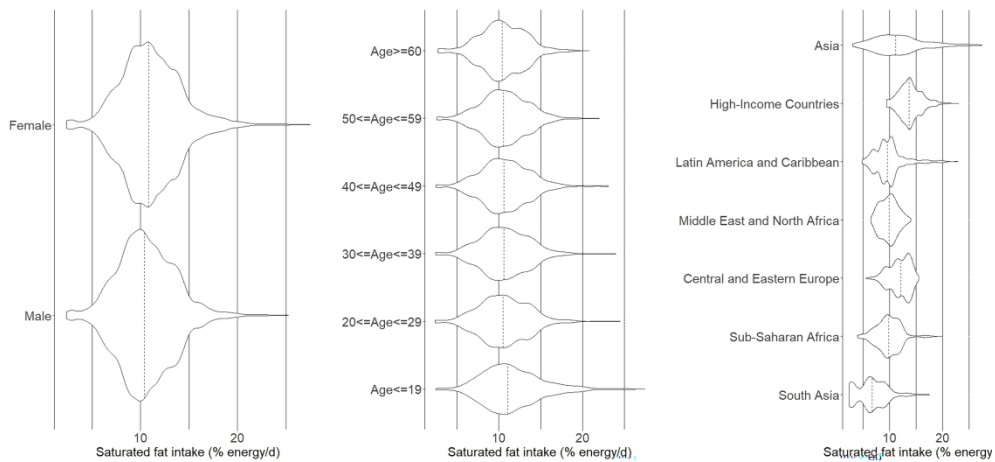

608x276mm (300 x 300 DPI)

1  
2  
3  
4  
5  
6  
7  
8  
9  
10  
11  
12  
13  
14  
15  
16  
17  
18  
19  
20  
21  
22  
23  
24  
25  
26  
27  
28  
29  
30  
31  
32  
33  
34  
35  
36  
37  
38  
39  
40  
41  
42  
43  
44  
45  
46  
47  
48  
49  
50  
51  
52  
53  
54  
55  
56  
57  
58  
59  
60

## Unable to Convert Image

The dimensions of this image (in pixels) are too large to be converted. For this image to convert, the total number of pixels (height x width) must be less than 40,000,000 (40 megapixels).

1  
2  
3  
4  
5  
6  
7  
8  
9  
10  
11  
12  
13  
14  
15  
16  
17  
18  
19  
20  
21  
22  
23  
24  
25  
26  
27  
28  
29  
30  
31  
32  
33  
34  
35  
36  
37  
38  
39  
40  
41  
42  
43  
44  
45  
46  
47  
48  
49  
50  
51  
52  
53  
54  
55  
56  
57  
58  
59  
60

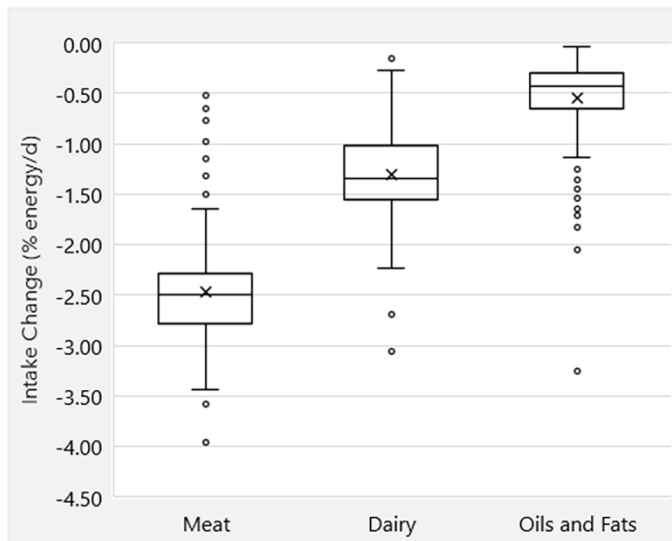

338x190mm (300 x 300 DPI)

## Unable to Convert Image

The dimensions of this image (in pixels) are too large to be converted. For this image to convert, the total number of pixels (height x width) must be less than 40,000,000 (40 megapixels).

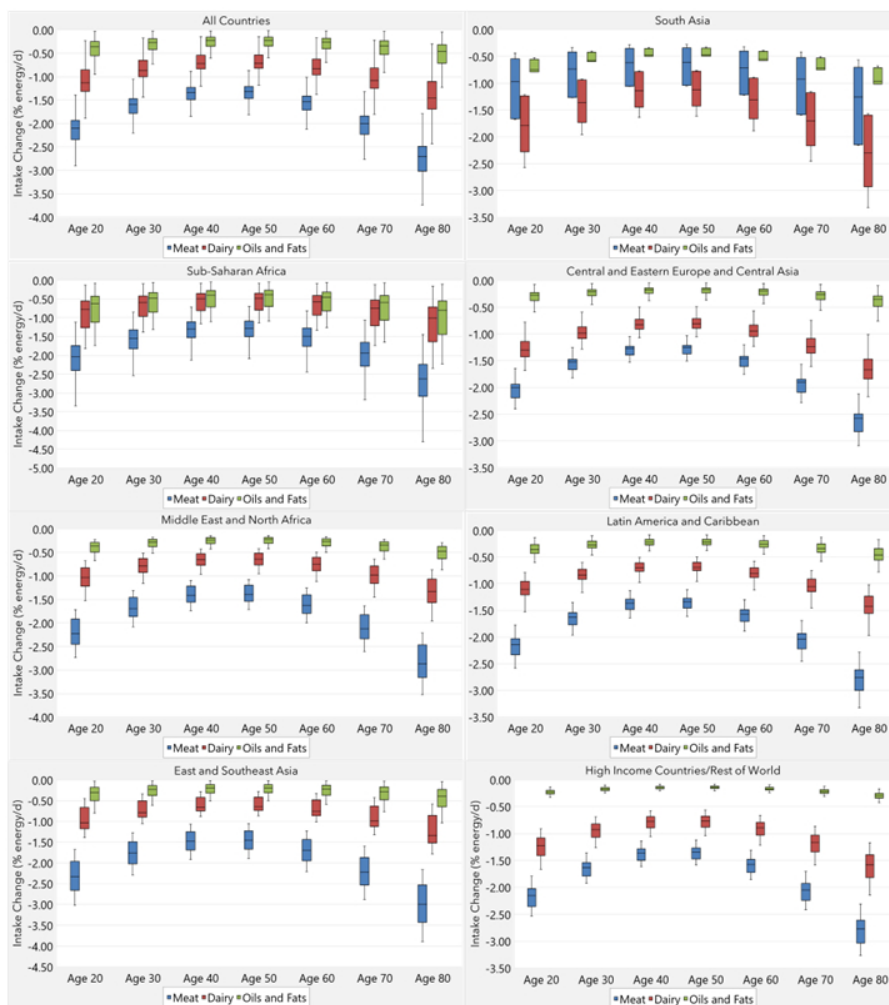

190x254mm (96 x 96 DPI)



## Supplemental Appendix

### Supplemental Table 1. Countries included in study by defined region

| Region                                                                      | Countries                                                                                                                                                                                                                                                                                                                                                                                                                                                        |
|-----------------------------------------------------------------------------|------------------------------------------------------------------------------------------------------------------------------------------------------------------------------------------------------------------------------------------------------------------------------------------------------------------------------------------------------------------------------------------------------------------------------------------------------------------|
| Southeast Asia, East Asia, and High-Income Asia Pacific (ASIA) 14 countries | Brunei Darussalam, Cambodia, China, Fiji, Indonesia, Japan, Laos, Malaysia, Myanmar, Philippines, Singapore, South Korea, Thailand, and Vietnam.                                                                                                                                                                                                                                                                                                                 |
| Central Europe, Eastern Europe, and Central Asia (CEE) 27 countries         | Albania, Armenia, Azerbaijan, Belarus, Bosnia and Herzegovina, Bulgaria, Croatia, Czech Republic, Estonia, Georgia, Hungary, Kazakhstan, Kyrgyz Republic, Latvia, Lithuania, Macedonia, Moldova, Mongolia, Montenegro, Poland, Romania, Russia, Serbia, Slovak Republic, Slovenia, Tajikistan, and Ukraine.                                                                                                                                                      |
| Latin America and the Caribbean (LAC) 29 countries                          | Antigua and Barbuda, Argentina, Bahamas, Barbados, Belize, Bolivia, Brazil, Chile, Colombia, Costa Rica, Dominica, Dominican Republic, Ecuador, El Salvador, Grenada, Guyana, Haiti, Honduras, Jamaica, Mexico, Nicaragua, Panama, Paraguay, Peru, St. Lucia, St. Vincent and Grenadines, Suriname, Trinidad and Tobago, and Uruguay.                                                                                                                            |
| Middle East and North Africa (MENA) 17 countries                            | Algeria, Bahrain, Egypt, Iran, Iraq, Israel, Jordan, Kuwait, Morocco, Oman, Qatar, Saudi Arabia, Tunisia, Turkey, United Arab Emirates, and West Bank and Gaza.                                                                                                                                                                                                                                                                                                  |
| South Asia (S-ASIA) – 7 countries                                           | Bangladesh, Bhutan, India, Maldives, Nepal, Pakistan, and Sri Lanka.                                                                                                                                                                                                                                                                                                                                                                                             |
| Sub-Saharan Africa (SSA) 43 countries                                       | Angola, Benin, Botswana, Burkina Faso, Burundi, Cabo Verde, Cameroon, Central African Republic, Chad, Comoros, Congo DR, Congo, Côte d'Ivoire, Djibouti, Equatorial Guinea, Eswatini, Ethiopia, Gabon, Gambia, Ghana, Guinea, Guinea Bissau, Kenya, Lesotho, Liberia, Madagascar, Malawi, Mali, Mauritania, Mauritius, Mozambique, Namibia, Niger, Nigeria, Rwanda, São Tomé and Príncipe, Senegal, Seychelles, Sierra Leone, Sudan, Tanzania, Togo, and Uganda. |
| High Income/Rest of World (HIC) 24 countries                                | Australia, Austria, Belgium, Canada, Cyprus, Denmark, Finland, France, Germany, Greece, Iceland, Ireland, Italy, Luxembourg, Malta, Netherlands, New Zealand, Norway, Portugal, Spain, Sweden, Switzerland, United Kingdom, and United States.                                                                                                                                                                                                                   |

## Income, Price, and Expenditure Data Across Countries

Supplemental Figures 1 – 3 contain box plots by region for the country-specific explanatory variables.

**Supplemental Figure 1** shows real GDP per capita (PPP) for the seven regions in our study. The highest GDP region is High-Income Countries, which is unsurprising. The median income for High-Income Countries was \$51,432 per person. In contrast, Sub-Saharan Africa had the smallest real GDP per capita, with a median value of \$3,147.

**Supplemental Figure 2** shows expenditure shares for the contributing food categories: meats, dairy, and oils and fats by region. Food expenditure shares were derived from the World Bank International Comparison Program (ICP) which allows for global spending comparisons by standardizing expenditures to a common currency (U.S. Dollars). Across regions, meat expenditures were the highest food expenditure category, except for South Asia. In South Asia, the median dairy food expenditure share was the highest at 0.47 and the interquartile range (IQR) was 0.34 to 0.60. Asia, Latin America and Caribbean, and Sub-Saharan Africa were the regions with the highest median expenditures for meats at 0.65 and an IQR from 0.55 to 0.74. South Asia has the lowest meat expenditure share at 0.31 with an IQR from 0.16 to 0.48. Apart from South Asia, dairy expenditure shares represented the second highest expenditure shares across regions. Oils and fats account for the smallest share of food expenditures compared to the other food categories for all regions.

**Supplemental Figure 3** shows the price indexes for meat, dairy, and oil and fats, and the weighted average price index (weighted based on the expenditures in Supplemental Figure 2) by region. The weighted average food price index is the sum of each price index times the expenditure share for the corresponding food category. Most regions exhibit relatively similar values across price index categories and shorter “whiskers” include Central and Eastern Europe, Middle East and North Africa, and South Asia. Alternatively, some regions (High-Income Countries, Latin America and Caribbean, and Sub-Saharan Africa) exhibit a greater range between the IQR and maximum and minimum values and greater variation in prices. For example, in the Latin American and Caribbean region, the dairy price index has a median value of 134.49 and IQR of 98.60 to 156.59. In contrast, the Central and Eastern Europe region has a dairy price index median value of 86.58 and IQR range of 75.84 to 93.50.

1  
2  
3  
4  
5  
6  
7  
8  
9  
10  
11  
12  
13  
14  
15  
16  
17  
18  
19  
20  
21  
22  
23  
24  
25  
26  
27  
28  
29  
30  
31  
32  
33  
34  
35  
36  
37  
38  
39  
40  
41  
42  
43  
44  
45  
46  
47

Supplemental Figure 1. Real GDP Per Capita (PPP) by Region

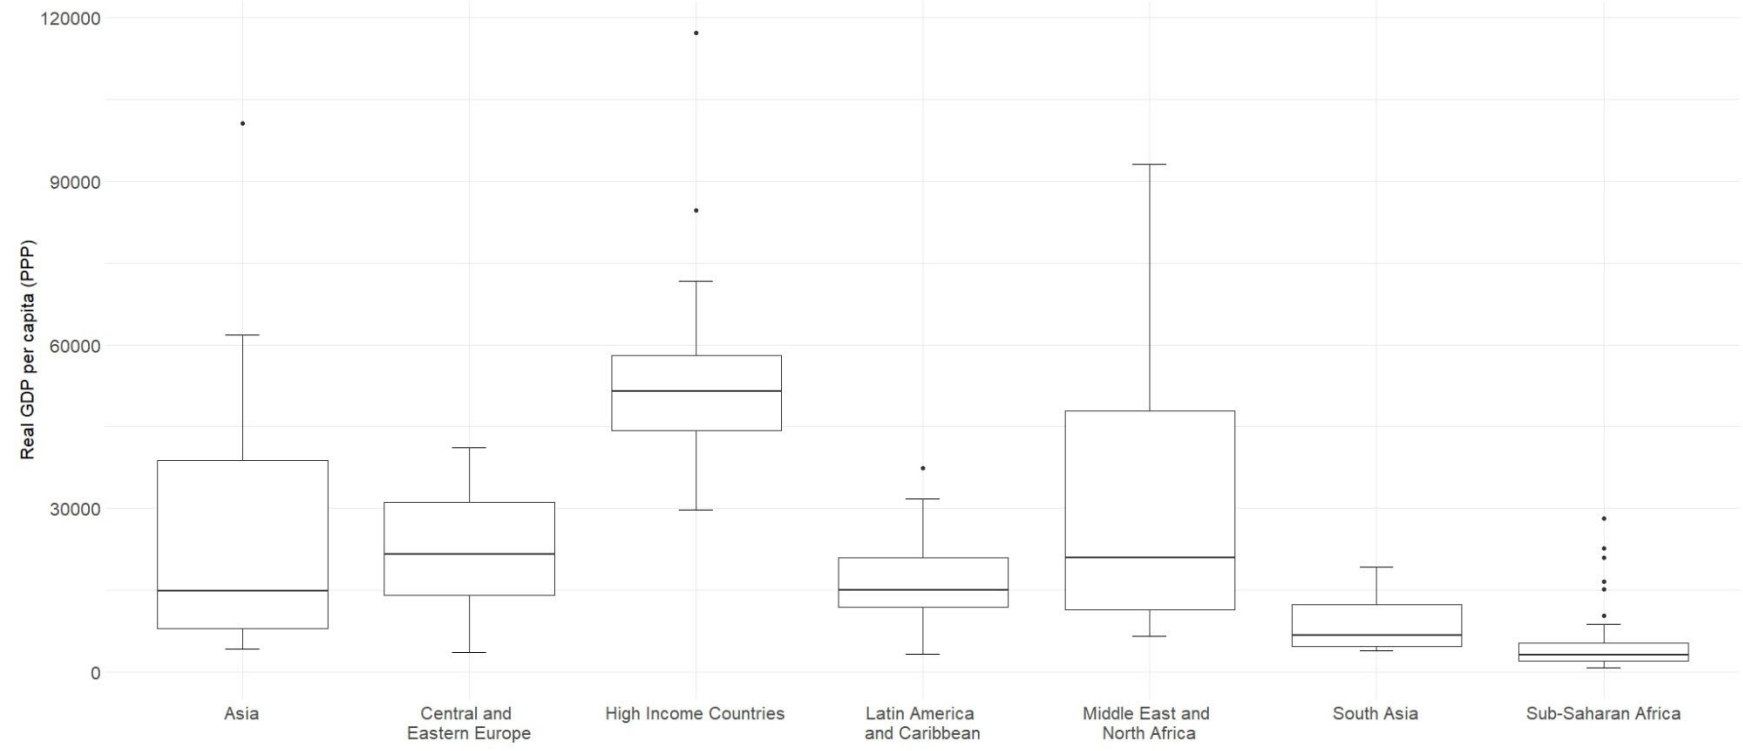

Supplemental Figure 2. Food Expenditure Shares by Region

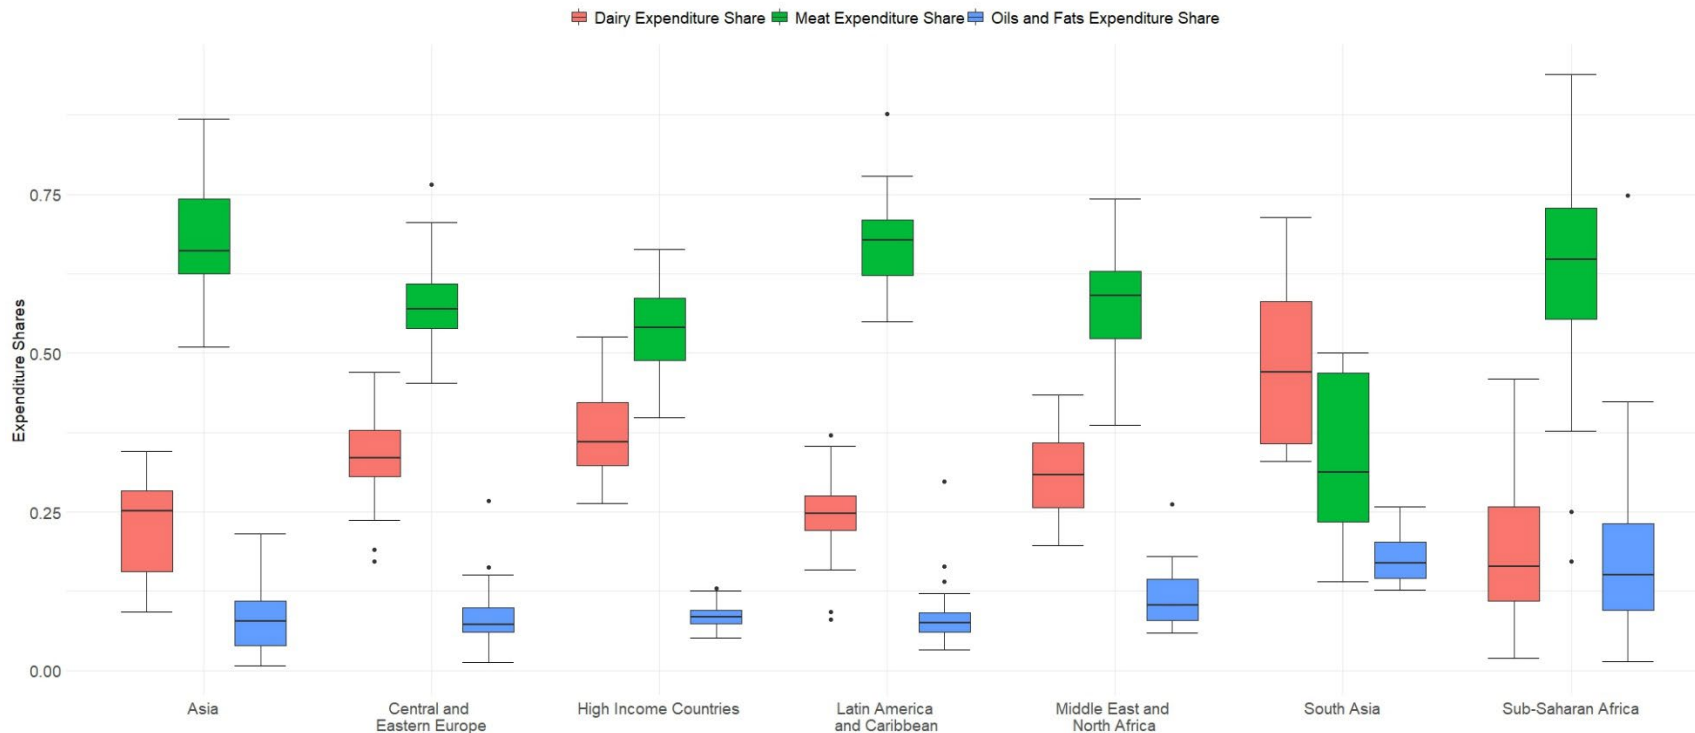

only

1  
2  
3  
4  
5  
6  
7  
8  
9  
10  
11  
12  
13  
14  
15  
16  
17  
18  
19  
20  
21  
22  
23  
24  
25  
26  
27  
28  
29  
30  
31  
32  
33  
34  
35  
36  
37  
38  
39  
40  
41  
42  
43  
44  
45  
46  
47

Supplemental Figure 3. Price Indexes for each Food Category and Weighted Average by Region

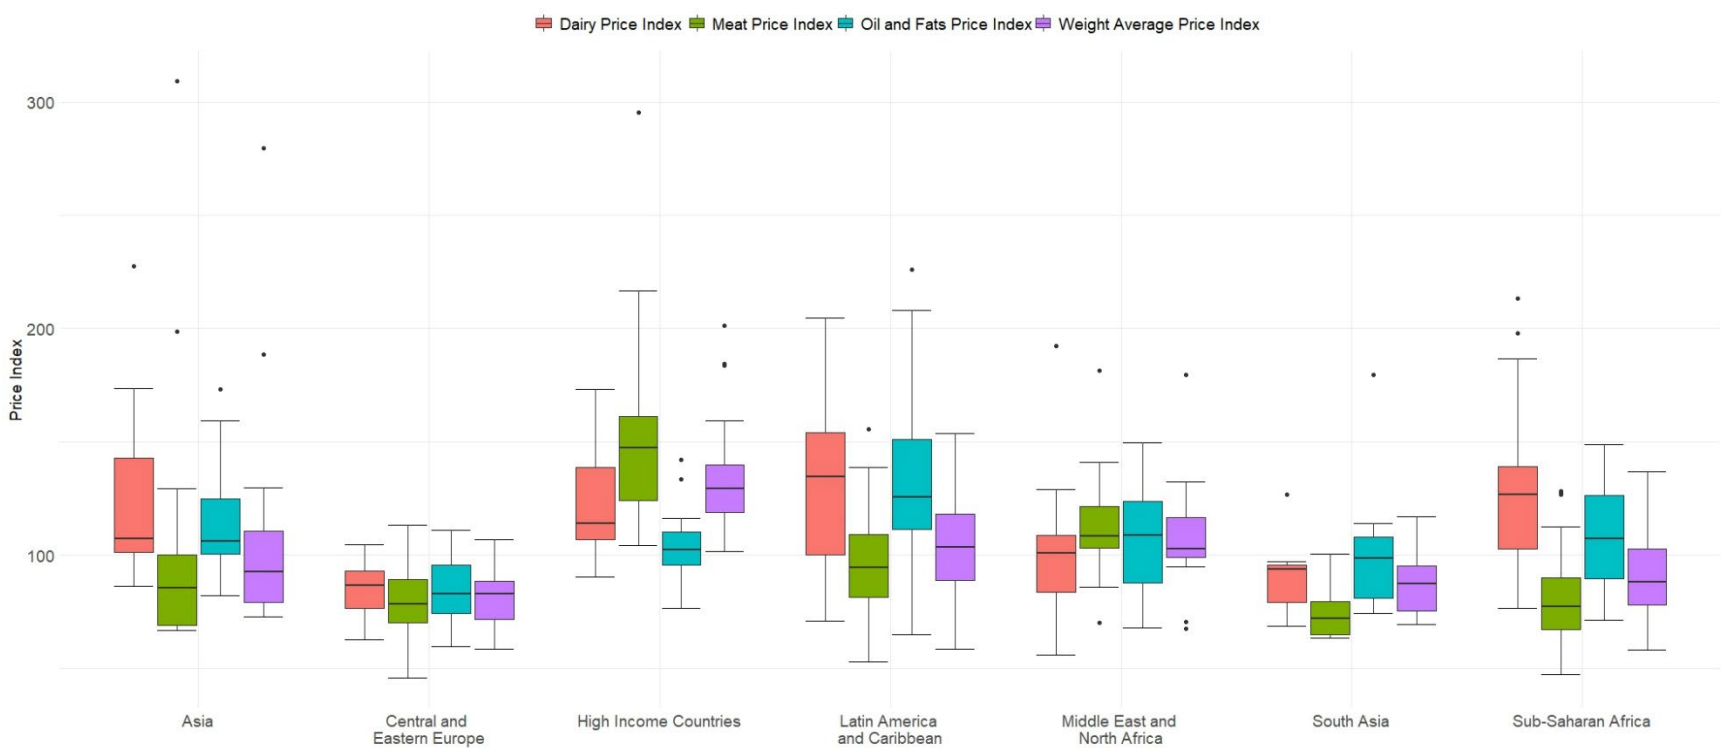

only

## Global Dietary Database Corresponding Members

Pamela Abbott, Director of the Centre for Global Development, University of Aberdeen, UK; Morteza Abdollahi, National Nutrition and Food Technology Research Institute (NNFTRI): SBMU; Parvin Abedi, Menopause Andropause Research Center, Ahvaz Jundishapur University of Medical Sciences; Suhad Abumweis, Al Ain University, Abu Dhabi, UAE; Linda Adair; Mohannad Al Nsour, Eastern Mediterranean Public Health Network: EMPHNET; Iftikhar Alam, BKUC.edu.pk; Nasser Al-Daghri and Dr. Shaun Sabico, King Saud University, Saudi Arabia; Nawal Ai, alHamad, Public Authority For Food and Nutrition, Kuwait; Suad Al-Hooti, Kuwait Institute for Scientific Research; Eman Alissa, King Abdulaziz University; Sameer Al-Zenki; Simon Anderson, University of Manchester; Karim Anzid, Cadi Ayyad University; Carukshi Arambepola, Faculty of Medicine, University of Colombo, Sri Lanka; Mustafa Arici, Hacettepe University Faculty of Medicine; Joanne Arsenault, FHI Solutions; Renzo Asciale; Lajos Biró; Noël Barengo, Herbert Wertheim College of Medicine; Simon Barquera, Juan Rivera Dommarco, Daniel Illescas-Zarate, Luz Maria Sánchez-Romero, Sonia Rodriguez Ramirez, and Ivonne Ramirez Silva, National Institute of Public Health (INSP), Mexico; Murat Bas, Acibadem University; Wulf Becker; Sigrid Beer-Borst; Per Bergman, Anna Karin Lindroos, Jessica Petrelius Sipinen, and Lotta Moraeus, Swedish National Food Agency; Sesikeran Boindala, National Institute of Nutrition India; Pascal Bovet, University Center for Primary Care and Public Health (Unisanté), Lausanne, Switzerland, and Ministry of Health, Seychelles; Debbie Bradshaw; Noriklil Bukhary Ismail Bukhary, Ministry of Health (Malaysia); Kanitta Bundhamcharoen; Mauricio T. Caballero, Fundacion INFANT and Consejo Nacional De Investigaciones Cientificas y Tecnicas (CONICET); Neville Calleja, Directorate for Health Information & Research; Xia Cao; Mario Capanzana, Food and Nutrition Research Institute, Department of Science and Technology; Jan Carmikle, Senior Intellectual Property Office; Katia Castetbon, Institut de Veille Sanitaire; Michelle Castro, Departamento de Alimentação Escolar; Corazon Cerdana; Hsing-Yi Chang, National Health Research Institutes; Karen Charlton; Yu Chen, NYU School of Medicine; Shashi Chiplonkar, HC Jehangir Medical Research Institute, Pune India; Yoonsu Cho, Korea University; Khun-Aik Chuah; Simona Costanzo, Marialaura Bonaccio, and Licia Iacoviello, IRCCS INM Neuromed; Melanie Cowan; Albertino Damasceno, Faculty of Medicine, Eduardo Mondlane University, Maputo, Mozambique; Saeed Dastgiri, Tabriz University of Medical Sciences; Stefaan De Henauw and Carl Lachat, Ghent University, Belgium; Karin DeRidder, Belgian Public Health Institute; Eric Ding, Harvard School of Public Health; Rokiah Don; Charmaine Duante; Vesselka Duleva, National Center for Public Health, Sofia, Bulgaria; Samuel Duran Aguero, Universidad San Sebastian, Chile; Veena Ekbote, Hirabai Cowasji Jehangir Medical Research Institute, Jehangir Hospital, Pune, India; Jalila El Ati, National Institute of Nutrition and Food Technology & SURVEN RL; Alison Eldridge, Nestle Research Center; Tatyana El-kour and Laetitia Nikiema, World Health Organization (WHO); Ibrahim Elmadfa, University of Vienna; Helene Enghardt Barbieri; Alireza Esteghamati, Tehran University of Medical Sciences; Zohreh Etemad, Dutch National Institute for Public Health and the Environment (RIVM); Fariza Fadzil, Ministry of Health, Malaysia; Farshad Farzadfar; Mei Fen Chan; Anne Fernandez, Perdana University, Royal College of Surgeons in Ireland; Dulitha Fernando; Regina Fisberg, University of Sao Paulo, Brazil; Simon Forsyth, The University of Queensland School of Public Health; Edna Gamboa Delgado, Fundacion Cardiovascular de Colombia; Didier Garriguet, Statistics Canada; Jean-Michel Gaspoz; Dorothy Gauci; Johanna M. Geleijnse, Wageningen University; Brahmam Ginnela;

1  
2  
3 Giuseppe Grosso, Department of Biomedical and Biotechnological Sciences, University of  
4 Catania, Italy; Idris Guessous, Geneva University Hospitals; Martin Gulliford, King's College  
5 London; Ingibjorg Gunnarsdottir and Inga Thorsdottir, University of Iceland; Holmfridur  
6 Thorgeirsdottir, Directorate of Health, Iceland; Wilbur Hadden; Aida Hadziomeragic, Institute of  
7 Public Health of Federation of Bosnia and Herzegovina; Christian Haerpfer; Jemal Haidar Ali,  
8 Addis Ababa University; Rubina Hakeem, Ziauddin University Karachi; Aminul Haque,  
9 University of Dhaka; Maryam Hashemian, Tehran University of Medical Sciences and Utica  
10 University; Rajkumar Hemalatha, Avula Laxmaiah, Indrapal Meshram, Harikumar Rachakulla,  
11 and Nimmathota Arlappa ICMR-National Institute of Nutrition, Hyderabad; Sigrun Henjum,  
12 Oslo and Akerhus University College; Hristo Hinkov, National Center of Public Health and  
13 Analyses (NCPHA); Zaiton Hjdaud; Daniel Hoffman, Rutgers University; Beth Hopping;  
14 Anahita Houshiar-rad, National Nutrition & Food Technology Research Ins; Yao-Te Hsieh,  
15 Institute of Biomedical Sciences, Academia Sinica, Taipei, Taiwan; Shu-Yi Hung; Inge  
16 Huybrechts, International Agency for Research on Cancer; Nahla Chawkat Hwalla, American  
17 University of Beirut; Nayu Ikeda; Manami Inoue; Olof Jonsdottir; Hamid Jan Bin Jan Mohamed,  
18 Universiti Sains Malaysia; Chandrashekar Janakiram, Amrita School of Dentistry; Ranil  
19 Jayawardena, University of Colombo; Rajesh Jeewon, University of Mauritius; Nattinee Jitnarin;  
20 Lars Johansson; Ola Kally; Mirnalini Kandiah; Tilakavati Karupaiah, National University of  
21 Malaysia; Lital Keinan-Boker, Rebecca Goldsmith, and Tal Shimony, Israel Center for Disease  
22 Control; Roya Kelishadi, Research Institute for Primordial Prevention of NCD, Isfahan  
23 University of Medical Sciences; Anuradha Khadilkar, Hirabai Cowasji Jehangir Medical  
24 Research Institute; Cho-il Kim, Korea Health Industry Development Institute; Eda Koksall, Gazi  
25 University; Jurgen Konig, University of Vienna, Department of Nutritional Sciences; Liisa  
26 Korkalo, Riitta Freese, and Maijaliisa Erkkola, University of Helsinki; Eva Roos, University of  
27 Helsinki, Department of Food and Nutrition; Jeremy Koster, University of Cincinnati; Irina  
28 Kovalskys, ICCAS (Instituto para la cooperacion científica en ambiente y salud), Argentina;  
29 Anand Krishnan, All India Institute of Medical Sciences; Herculina Kruger, North-West  
30 University, Potchefstroom South Africa; Rebecca Kuriyan-Raj, St John's Research Institute;  
31 Kyungwon Oh, Sanghui Kweon and Sihyun Park, Korea Disease Control and Prevention Agency  
32 (KDCA); Yuen Lai; Pulani Lanerolle, University of Colombo, Sri Lanka; Indu Waidyatilaka,  
33 University of Colombo, Sri Lanka; Catherine Leclercq; Meei-Shyuan Lee; Hae-Jeung Lee, Eulji  
34 University; J Lennert Veerman, The University of Queensland; Lydia Lera Marques, Unidad de  
35 Nutricion Publica-Professor Asociado; Yanping Li, Harvard School of Public Health; Jaana  
36 Lindström; Annie Ling; Nur Indrawaty Lipoeto, Andalas University; Patricio Lopez-Jaramillo,  
37 FOSCAL and UDES; Amy Luke, Loyola University Chicago; Widjaja Lukito; Nuno Lunet,  
38 Faculty of Medicine, University of Porto, Portugal; Carla Lopes and Milton Severo, Faculty of  
39 Medicine/ Institute of Public Health, University of Porto, Portugal; Duarte Torres, Faculty of  
40 Nutrition and Food Sciences / Institute of Public Health, University of Porto, Portugal; Elisabette  
41 Lupotto, Aida Turrini, Stefania Sette, and Raffaella Piccinelli, CREA-Alimenti e Nutrizione;  
42 Guansheng Ma; Yi Ma; Zaleha Abdullah Mahdy, National University of Malaysia (UKM); Reza  
43 Malekzadeh, Digestive Disease Research Institute, Tehran University of Medical Sciences; Wan  
44 Manan, Universiti Sains Malaysia; Dirce Marchioni, University of Sao Paolo; Pedro Marques-  
45 Vidal, Lausanne University Hospital (CHUV) and University of Lausanne, Switzerland; Yves  
46 Martin-Prevel, Institut de Recherche pour le Developpement; Hajah Masni Ibrahim; Angie  
47 Mathee; Yasuhiro Matsumura, Bunkyo University, Faculty of Health and Nutrition; Paramita  
48 Mazumdar, Centre For Media Studies; Abla M. Sibai, Faculty of Health Sciences - American  
49  
50  
51  
52  
53  
54  
55  
56  
57  
58  
59  
60



1  
2  
3 University of Beirut; Anjum Memon, Brighton and Sussex Medical School, UK; Gert Mensink,  
4 Robert Koch Institute; Alexa Meyer, University of Vienna, Austria; Parvin Mirmiran, Research  
5 Institute for Endocrine Sciences, Shahid Beheshti University of Medical Sciences; Masoud  
6 Mirzaei, Yazd Cardiovascular Research Centre, Shahid Sadoughi University of Medical  
7 Sciences; Puneet Misra, All India Institute of Medical Sciences; Anoop Misra, Fortis CDOC  
8 Center for Excellence for Diabetes; Claudette Mitchell and David Balfour, University of the  
9 Southern Caribbean; Noushin Mohammadifard, Nizal Sarrafzadegan, Moses Mwangi, and  
10 Maryam Maghroun, Isfahan Cardiovascular Research Center, Cardiovascular Research Institute,  
11 Isfahan University of Medical Sciences; Fatemeh Mohammadi-Nasrabadi, National Nutrition  
12 and Food technology Research Institute; Zalilah Mohd Shariff, Universiti Putra Malaysia; Foong  
13 Ming Moy, University of Malaya; Abdulrahman Musaiger, Arab Center for Nutrition; Elizabeth  
14 Mwaniki, The Technical University of Kenya; Jannicke Myhre; Balakrishna Nagalla, National  
15 Institute of Nutrition, Hyderabad; Androniki Naska; Augustin Nawidimbamba Zeba, Institut de  
16 Recherche en sciences de la Sante; Shu Wen Ng, University of North Carolina at Chapel Hill; Le  
17 Tran Ngoan, Hanoi Medical University; Sina Noshad, Tehran University of Medical Sciences;  
18 Angelica Ochoa, Universidad de Cuenca; Marga Ocke, Dutch National Institute for Public  
19 Health and the Environment: RIVM; Jillian Odenkirk; Mariana Oleas, Universidad Tecnica del  
20 Norte; Sonia Olivares, Institute of Nutrition and Food Technology (INTA), University of Chile;  
21 Philippos Orfanos; Johana Ortiz-Ulloa, Cuenca University; Johanna Otero, Fundacion  
22 Oftalmologica de Santander (FOSCAL); Marja-Leena Ovaskainen; Mohammadreza Pakseresht,  
23 University of Alberta; Cristina Palacios, Florida International University; Pam Palmer; Wen-  
24 Harn Pan, Institutes of Biomedical Sciences, Academia Sinica; Demosthenes Panagiotakos,  
25 Harokopio University; Rajendra Parajuli, Tribhuvan University; Gulden Pekcan; Stefka Petrova,  
26 National Centre of Public Health and Analyses; Noppawan Piaseu, Mahidol University; Christos  
27 Pitsavos; Kalpagam Polasa, National Institute of Nutrition; Luz Posada, Universidad de  
28 Antioquia; Farhad Pourfarzi, Ardabil University of Medical Sciences; Alan Martin Preston, Univ  
29 Puerto Rico-Med Sci Dept Biochemistry; Ingrid Rached, Centro de Atencion Nutricional  
30 Antimano (CANIA); Ali Reza Rahbar; Colin Rehm; Almut Richter, Robert Koch Institute;  
31 Leanne Riley; Benoit Salanave; Norie Sawada and Shoichiro Tsugane, National Cancer Center  
32 Institute for Cancer Control, Japan; Makiko Sekiyama, Graduate Program in Sustainability  
33 Science Global Leadership Initiative (GPSS–GLI), The University of Tokyo; Rusidah Selamat;  
34 Khadijah Shamsuddin, Universiti Kebangsaan Malaysia Medical Centre; Sangita Sharma,  
35 University of Alberta; Harri Sinkko; Isabelle Sioen; Ivan Sisa, Universidad San Francisco de  
36 Quito; Sheila Skeaff, University of Otago; Laufey Steingrimsdottir; Tor Strand, University of  
37 Bergen; Milton Fabian Suarez-Ortegon, University of Edinburgh; Sumathi Swaminathan, St  
38 John’s Research Institute; Gillian Swan; Elzbieta Sygnowska; Maria Szabo; Lucjan Szponar,  
39 National Food and Nutrition Institute; Ilse Khouw and Swee Ai Ng, FrieslandCampina, The  
40 Netherlands; Heli Tapanainen, The National Institute for Health and Welfare (THL); Reema  
41 Tayyem, Qatar University and University of Jordan; Bemnet Tedla; Alison Tedstone; Robert  
42 Templeton; Celine Termote, Bioversity International; Anastasia Thanopoulou, Diabetes Center,  
43 2nd Department of Internal Medicine, Athens University, Greece; Dimitrios Trichopoulos;  
44 Antonia Trichopoulou, Hellenic Health Foundation and University of Athens; Coline van  
45 Oosterhout; Erkki Vartiainen; Suvi Virtanen, National Institute for Health and Welfare; Peter  
46 Vollenweider; Marieke Vossenaar, CeSIAM in Guatemala; Eva Warensjo Lemming, Risk and  
47 Benefit Assessment Department, Swedish Food Agency; Anna Waskiewicz, Department of CVD  
48 Epidemiology, Prevention and Health Promotion, Institute of Cardiology, Warsaw, Poland;  
49  
50  
51  
52  
53  
54  
55  
56  
57  
58  
59  
60



1  
2  
3 Lothar Wieler, Robert Koch Institute; Suh Wu; Roseyati Yaakub; Mabel Yap; Safiah Yusof;  
4 Sahar Zaghoul, National Nutrition Institute, Egypt; Gábor Zajkás; Maria Elisa Zapata, CESNI;  
5 Khairul Zarina; Fatemeh Vida Zohoori, Teesside University; Mark Manary, Washington  
6 University in St. Louis; Zipporah Bukania and Yeri Kombe, Kenya Medical Research Institute;  
7 Sirje Vaask, Tallinn University; Julie Long, K. Michael Hambidge, Tshilenge S. Diba,  
8 Shivanand C. Mastiholi, Umber S. Khan, and Gabriela Tejada, University of Colorado Anschutz  
9 Medical Campus; Eha Nurk, Estonian National Institute for Health Development; Keiu Nelis;  
10 Ute Nöthlings and Ute Alexy, University of Bonn, Department of Nutrition and Food Sciences;  
11 Cornelia Tudorie and Anca Nicolau, University Dunarea de Jos, Galati, Romania; Amanda de  
12 Moura Souza, Institute of Studies in Public Health, Federal University of Rio de Janeiro (UFRJ);  
13 Alan de Brauw, Mourad Moursi, International Food Policy Research Institute (IFPRI); Alicia  
14 Roviroso, Centro de Estudios sobre Nutrición Infantil; Carol Henry, Getahun Ersino, and Gordon  
15 Zello, University of Saskatchewan, Saskatoon, Canada; Chanthaly Luangphaxay, Daovieng  
16 Douangvichit, and Latsamy Siengsounthone, Lao Tropical and Public Health Institute; Christine  
17 Hotz; Constance Rybak, Leibniz Centre for Agricultural Landscape Research; Corina Aurelia  
18 Zugravu, University of Medicine and Pharmacy Carol Davila Bucharest Romania; Donka  
19 Baykova, Medical Center Markovs; Elizabeth Yakes-Jimenez, The University of New Mexico;  
20 Gudrun B. Keding, University of Goettingen, Germany; Lydiah M. Waswa, Egerton University,  
21 Kenya; Irmgard Jordan, Justus Liebig University Giessen; J.V. Meenakshi, Delhi School of  
22 Economics, University of Delhi; Josie Desnacido and Imelda Angeles Agdeppa, Food and  
23 Nutrition Research Institute (DOST-FNRI); Justin Chileshe and Sydney Mwanza, Tropical  
24 Diseases Research Centre; Kalyana Sundram, Malaysian Palm Oil Council (MPOC); Laila  
25 Eleraky and Wolfgang Stuetz, University of Hohenheim; Lalka Rangelova, National Centre of  
26 Public Health and Analyses; Lilian Aluso, Julia Boedecker, and Francis Oduor, Consultative  
27 Group on International Agricultural Research (CGIAR); Lluís Serra-Majem, University of Las  
28 Palmas de Gran Canaria (ULPGC), Canary Islands, Spain; Tamene Taye Asayehu, College of  
29 Applied Sciences, Department of Food Science and Applied Nutrition, Addis Ababa Science and  
30 Technology University; Veronika Janská, Public Health Authority of the Slovak Republic; Ward  
31 Siamusantu, National Food and Nutrition Commission; Ken Brown, University of California,  
32 Davis  
33  
34  
35  
36  
37  
38  
39  
40  
41  
42  
43  
44  
45  
46  
47  
48  
49  
50  
51  
52  
53  
54  
55  
56  
57  
58  
59  
60

## CHEERS 2022 Checklist

| Topic           | No. | Item                                                                                       | Location where item is reported                                                                         |
|-----------------|-----|--------------------------------------------------------------------------------------------|---------------------------------------------------------------------------------------------------------|
| <b>Title</b>    |     |                                                                                            |                                                                                                         |
|                 | 1   | Identify the study as an economic evaluation and specify the interventions being compared. | Examining the influence of price and income on global saturated fat intake: evidence from 160 countries |
| <b>Abstract</b> |     |                                                                                            |                                                                                                         |

| Topic               | No. Item                                                                                                | Location where item is reported                                                                                                                                                                                                                                                                                                                                                                                                                                                                                                                                                                                                                                                                                                                                                                                                                                                                                                                                                                                                                                                                                                                                                                                                                                                                                                                                                                                                                                                                                                                                                                                                                                                                                                                                                                  |
|---------------------|---------------------------------------------------------------------------------------------------------|--------------------------------------------------------------------------------------------------------------------------------------------------------------------------------------------------------------------------------------------------------------------------------------------------------------------------------------------------------------------------------------------------------------------------------------------------------------------------------------------------------------------------------------------------------------------------------------------------------------------------------------------------------------------------------------------------------------------------------------------------------------------------------------------------------------------------------------------------------------------------------------------------------------------------------------------------------------------------------------------------------------------------------------------------------------------------------------------------------------------------------------------------------------------------------------------------------------------------------------------------------------------------------------------------------------------------------------------------------------------------------------------------------------------------------------------------------------------------------------------------------------------------------------------------------------------------------------------------------------------------------------------------------------------------------------------------------------------------------------------------------------------------------------------------|
|                     | 2 Provide a structured summary that highlights context, key methods, results, and alternative analyses. | <p>Introduction When considering proposals to improve diets, it is important to understand how factors like price and income can affect saturated fat intake and demand. This is even more important when considering economic interventions on a global scale. In this study, we examine and estimate the influence of price and income on intake across 160 countries, by age and sex, and derive sensitivity measures (elasticities) that vary by age, sex, and geographic region. Methods Secondary data were used for this analysis. Intake data by age, sex, and country were obtained from the 2018 Global Dietary Database. These data were then linked to global price data for select food groups from the World Bank International Comparison Program and income data from the World Development Indicators Databank (World Bank). We estimated intake responsiveness to income and prices, accounting for differences by world region, age, and sex. Results Intake differences due to price were highly significant, with a one percent increase in price associated with lower SF intake (% energy/d) of about 4.3 percentage points. Results indicated that the highest price sensitivity was due to meat consumption. We also find significant differences across regions. In high-income countries, median (age 40) intake reductions were e 1.4, 0.8, and 0.2 percentage points, given a one-percent increase in the price of meat, dairy, and oils and fats, respectively. Intake differences due to income were insignificant. Conclusion The results of this study show heterogeneous associations among prices and intake within and across countries. Policymakers should consider these heterogenous effects as they address global nutrition and health challenges.</p> |
| <b>Introduction</b> |                                                                                                         |                                                                                                                                                                                                                                                                                                                                                                                                                                                                                                                                                                                                                                                                                                                                                                                                                                                                                                                                                                                                                                                                                                                                                                                                                                                                                                                                                                                                                                                                                                                                                                                                                                                                                                                                                                                                  |

| Topic                                | No. | Item                                                                                                                            | Location where item is reported                                                                                                                                                                                                                                                                                                                                                                                                                                                                                                                                                                                                                                                                                                                                                                                                                    |
|--------------------------------------|-----|---------------------------------------------------------------------------------------------------------------------------------|----------------------------------------------------------------------------------------------------------------------------------------------------------------------------------------------------------------------------------------------------------------------------------------------------------------------------------------------------------------------------------------------------------------------------------------------------------------------------------------------------------------------------------------------------------------------------------------------------------------------------------------------------------------------------------------------------------------------------------------------------------------------------------------------------------------------------------------------------|
| <b>Background and objectives</b>     | 3   | Give the context for the study, the study question, and its practical relevance for decision making in policy or practice.      | To help address these knowledge gaps, this investigation assessed how price and country income relate to SF intake. We used nationally representative intake estimates from the 2018 Global Dietary Database to estimate how per capita income and prices jointly relate to SF intake by age and sex globally. Since nutrients are found in food, examinations of nutrient demand must consider food source demand, with price and income as explanatory variables.(15-17) Using price and expenditure data from the World Bank International Comparison Program, we constructed a global price series based on three food categories: meat, dairy, and oils and fats. This series sufficiently explained SF intake differences across countries and allowed for assessing the relationships of per capita income and price in each food category. |
| <b>Methods</b>                       |     |                                                                                                                                 |                                                                                                                                                                                                                                                                                                                                                                                                                                                                                                                                                                                                                                                                                                                                                                                                                                                    |
| <b>Health economic analysis plan</b> | 4   | Indicate whether a health economic analysis plan was developed and where available.                                             | No. This does not apply.                                                                                                                                                                                                                                                                                                                                                                                                                                                                                                                                                                                                                                                                                                                                                                                                                           |
| <b>Study population</b>              | 5   | Describe characteristics of the study population (such as age range, demographics, socioeconomic, or clinical characteristics). | Secondary data were used for this analysis. Intake data by age, sex, and country were obtained from the 2018 Global Dietary Database. These data were then linked to global price data for select food groups from the World Bank International Comparison Program and income data from the World Development Indicators Databank (World Bank). We estimated intake responsiveness to income and prices, accounting for differences by world region, age, and sex.                                                                                                                                                                                                                                                                                                                                                                                 |
| <b>Setting and location</b>          | 6   | Provide relevant contextual information that may influence findings.                                                            | Global study - 160 countries.                                                                                                                                                                                                                                                                                                                                                                                                                                                                                                                                                                                                                                                                                                                                                                                                                      |
| <b>Comparators</b>                   | 7   | Describe the interventions or strategies being compared and why chosen.                                                         | Economic analysis using secondary data. This does not apply.                                                                                                                                                                                                                                                                                                                                                                                                                                                                                                                                                                                                                                                                                                                                                                                       |

| Topic                                                   | No. | Item                                                                                                            | Location where item is reported                                                                                                                                                                                                                                                                                                                                                                                                                                                                                                                 |
|---------------------------------------------------------|-----|-----------------------------------------------------------------------------------------------------------------|-------------------------------------------------------------------------------------------------------------------------------------------------------------------------------------------------------------------------------------------------------------------------------------------------------------------------------------------------------------------------------------------------------------------------------------------------------------------------------------------------------------------------------------------------|
| <b>Perspective</b>                                      | 8   | State the perspective(s) adopted by the study and why chosen.                                                   | <ul style="list-style-type: none"> <li>It is generally understood that affordability is an important driver of food demand, underscoring the importance of income and prices in dietary choices. Research has confirmed significant associations among income, prices, and food demand. What is missing, however, is a better understanding of how price and income influence actual nutrient intake, particularly on a global scale, and how price and income relationships could vary by demographics within and across countries.</li> </ul> |
| <b>Time horizon</b>                                     | 9   | State the time horizon for the study and why appropriate.                                                       | 2017-2018                                                                                                                                                                                                                                                                                                                                                                                                                                                                                                                                       |
| <b>Discount rate</b>                                    | 10  | Report the discount rate(s) and reason chosen.                                                                  | N/A                                                                                                                                                                                                                                                                                                                                                                                                                                                                                                                                             |
| <b>Selection of outcomes</b>                            | 11  | Describe what outcomes were used as the measure(s) of benefit(s) and harm(s).                                   | N/A                                                                                                                                                                                                                                                                                                                                                                                                                                                                                                                                             |
| <b>Measurement of outcomes</b>                          | 12  | Describe how outcomes used to capture benefit(s) and harm(s) were measured.                                     | N/A                                                                                                                                                                                                                                                                                                                                                                                                                                                                                                                                             |
| <b>Valuation of outcomes</b>                            | 13  | Describe the population and methods used to measure and value outcomes.                                         | See 5.                                                                                                                                                                                                                                                                                                                                                                                                                                                                                                                                          |
| <b>Measurement and valuation of resources and costs</b> | 14  | Describe how costs were valued.                                                                                 | Income values were in \$US.                                                                                                                                                                                                                                                                                                                                                                                                                                                                                                                     |
| <b>Currency, price date, and conversion</b>             | 15  | Report the dates of the estimated resource quantities and unit costs, plus the currency and year of conversion. | Prices were indexes where World = 100.                                                                                                                                                                                                                                                                                                                                                                                                                                                                                                          |

| Topic                                                                        | No. | Item                                                                                                                                                                          | Location where item is reported                                                                                                                                                                                                                                                                                                                                                                                                                                                                                                                                           |
|------------------------------------------------------------------------------|-----|-------------------------------------------------------------------------------------------------------------------------------------------------------------------------------|---------------------------------------------------------------------------------------------------------------------------------------------------------------------------------------------------------------------------------------------------------------------------------------------------------------------------------------------------------------------------------------------------------------------------------------------------------------------------------------------------------------------------------------------------------------------------|
| <b>Rationale and description of model</b>                                    | 16  | If modelling is used, describe in detail and why used. Report if the model is publicly available and where it can be accessed.                                                | To estimate SF intake demand, we used a semi-log functional form that has been proven to be consistent with economic theory and rational consumer behavior.(25, 26) Many studies have used a double-log form.(27) However, a problem with the double-log form is that significant intake differences across subgroups can be lost in log conversions. A semi-log relationship allowed for a better assessment of subgroup effects on intake responsiveness.                                                                                                               |
| <b>Analytics and assumptions</b>                                             | 17  | Describe any methods for analysing or statistically transforming data, any extrapolation methods, and approaches for validating any model used.                               | Econometric analysis assuming country clusters.                                                                                                                                                                                                                                                                                                                                                                                                                                                                                                                           |
| <b>Characterising heterogeneity</b>                                          | 18  | Describe any methods used for estimating how the results of the study vary for subgroups.                                                                                     | Econometric analysis assuming country clusters.                                                                                                                                                                                                                                                                                                                                                                                                                                                                                                                           |
| <b>Characterising distributional effects</b>                                 | 19  | Describe how impacts are distributed across different individuals or adjustments made to reflect priority populations.                                                        | Intake differences due to price were highly significant, with a one percent increase in price associated with lower SF intake (% energy/d) of about 4.3 percentage points. Results indicated that the highest price sensitivity was due to meat consumption. We also find significant differences across regions. In high-income countries, median (age 40) intake reductions were e 1.4, 0.8, and 0.2 percentage points, given a one-percent increase in the price of meat, dairy, and oils and fats, respectively. Intake differences due to income were insignificant. |
| <b>Characterising uncertainty</b>                                            | 20  | Describe methods to characterise any sources of uncertainty in the analysis.                                                                                                  | Not applicable                                                                                                                                                                                                                                                                                                                                                                                                                                                                                                                                                            |
| <b>Approach to engagement with patients and others affected by the study</b> | 21  | Describe any approaches to engage patients or service recipients, the general public, communities, or stakeholders (such as clinicians or payers) in the design of the study. | N/A                                                                                                                                                                                                                                                                                                                                                                                                                                                                                                                                                                       |
| <b>Results</b>                                                               |     |                                                                                                                                                                               |                                                                                                                                                                                                                                                                                                                                                                                                                                                                                                                                                                           |

| Topic                                                                       | No. | Item                                                                                                                                                                     | Location where item is reported |
|-----------------------------------------------------------------------------|-----|--------------------------------------------------------------------------------------------------------------------------------------------------------------------------|---------------------------------|
| <b>Study parameters</b>                                                     | 22  | Report all analytic inputs (such as values, ranges, references) including uncertainty or distributional assumptions.                                                     | See Results                     |
| <b>Summary of main results</b>                                              | 23  | Report the mean values for the main categories of costs and outcomes of interest and summarise them in the most appropriate overall measure.                             | See Results                     |
| <b>Effect of uncertainty</b>                                                | 24  | Describe how uncertainty about analytic judgments, inputs, or projections affect findings. Report the effect of choice of discount rate and time horizon, if applicable. | N/A                             |
| <b>Effect of engagement with patients and others affected by the study</b>  | 25  | Report on any difference patient/service recipient, general public, community, or stakeholder involvement made to the approach or findings of the study                  | N/A                             |
| <b>Discussion</b>                                                           |     |                                                                                                                                                                          |                                 |
| <b>Study findings, limitations, generalisability, and current knowledge</b> | 26  | Report key findings, limitations, ethical or equity considerations not captured, and how these could affect patients, policy, or practice.                               | Discussion                      |
| <b>Other relevant information</b>                                           |     |                                                                                                                                                                          |                                 |
| <b>Source of funding</b>                                                    | 27  | Describe how the study was funded and any role of the funder in the identification, design, conduct, and reporting of the analysis                                       | End of manuscript               |
| <b>Conflicts of interest</b>                                                | 28  | Report authors conflicts of interest according to journal or International Committee of Medical Journal Editors requirements.                                            | End of manuscript               |

1  
2  
3 *From:* Husereau D, Drummond M, Augustovski F, et al. Consolidated Health Economic  
4 Evaluation Reporting Standards 2022 (CHEERS 2022) Explanation and Elaboration: A  
5 Report of the ISPOR CHEERS II Good Practices Task Force. Value Health 2022;25.  
6 [doi:10.1016/j.jval.2021.10.008](https://doi.org/10.1016/j.jval.2021.10.008)  
7  
8  
9  
10  
11  
12  
13  
14  
15  
16  
17  
18  
19  
20  
21  
22  
23  
24  
25  
26  
27  
28  
29  
30  
31  
32  
33  
34  
35  
36  
37  
38  
39  
40  
41  
42  
43  
44  
45  
46  
47  
48  
49  
50  
51  
52  
53  
54  
55  
56  
57  
58  
59  
60

For peer review only



# BMJ Open

## Examining the influence of price and income on global saturated fat intake: evidence from 160 countries

|                                 |                                                                                                                                                                                                                                                                                                                                                                                                                                                                                                                                                                                                                                                                                                                                                                                                                                                   |
|---------------------------------|---------------------------------------------------------------------------------------------------------------------------------------------------------------------------------------------------------------------------------------------------------------------------------------------------------------------------------------------------------------------------------------------------------------------------------------------------------------------------------------------------------------------------------------------------------------------------------------------------------------------------------------------------------------------------------------------------------------------------------------------------------------------------------------------------------------------------------------------------|
| Journal:                        | <i>BMJ Open</i>                                                                                                                                                                                                                                                                                                                                                                                                                                                                                                                                                                                                                                                                                                                                                                                                                                   |
| Manuscript ID                   | bmjopen-2023-074562.R1                                                                                                                                                                                                                                                                                                                                                                                                                                                                                                                                                                                                                                                                                                                                                                                                                            |
| Article Type:                   | Original research                                                                                                                                                                                                                                                                                                                                                                                                                                                                                                                                                                                                                                                                                                                                                                                                                                 |
| Date Submitted by the Author:   | 22-Nov-2023                                                                                                                                                                                                                                                                                                                                                                                                                                                                                                                                                                                                                                                                                                                                                                                                                                       |
| Complete List of Authors:       | Ahles, Amelia; Texas A&M University System<br>MUHAMMAD, ANDREW; The University of Tennessee Knoxville Institute of Agriculture,<br>Yenerall, Jacqueline; The University of Tennessee Knoxville Institute of Agriculture<br>Reedy, Julia; Tufts University Friedman School of Nutrition Science and Policy<br>Shi, Peilin; Friedman School of Nutrition Science and Policy, Tufts University,<br>Zhang, Jianyi; Tufts University Friedman School of Nutrition Science and Policy<br>Cudhea, Frederick; Tufts University Friedman School of Nutrition Science and Policy,<br>Erndt-Marino, Josh; Tufts University Friedman School of Nutrition Science and Policy<br>Miller, Victoria ; Tufts University Friedman School of Nutrition Science and Policy,<br>Mozaffarian, Dariush; Tufts University Friedman School of Nutrition Science and Policy |
| <b>Primary Subject Heading</b>: | Health economics                                                                                                                                                                                                                                                                                                                                                                                                                                                                                                                                                                                                                                                                                                                                                                                                                                  |
| Secondary Subject Heading:      | Health economics, Global health                                                                                                                                                                                                                                                                                                                                                                                                                                                                                                                                                                                                                                                                                                                                                                                                                   |
| Keywords:                       | HEALTH ECONOMICS, Decision Making, Obesity                                                                                                                                                                                                                                                                                                                                                                                                                                                                                                                                                                                                                                                                                                                                                                                                        |
|                                 |                                                                                                                                                                                                                                                                                                                                                                                                                                                                                                                                                                                                                                                                                                                                                                                                                                                   |

SCHOLARONE™  
Manuscripts

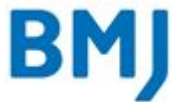

I, the Submitting Author has the right to grant and does grant on behalf of all authors of the Work (as defined in the below author licence), an exclusive licence and/or a non-exclusive licence for contributions from authors who are: i) UK Crown employees; ii) where BMJ has agreed a CC-BY licence shall apply, and/or iii) in accordance with the terms applicable for US Federal Government officers or employees acting as part of their official duties; on a worldwide, perpetual, irrevocable, royalty-free basis to BMJ Publishing Group Ltd ("BMJ") its licensees and where the relevant Journal is co-owned by BMJ to the co-owners of the Journal, to publish the Work in this journal and any other BMJ products and to exploit all rights, as set out in our [licence](#).

The Submitting Author accepts and understands that any supply made under these terms is made by BMJ to the Submitting Author unless you are acting as an employee on behalf of your employer or a postgraduate student of an affiliated institution which is paying any applicable article publishing charge ("APC") for Open Access articles. Where the Submitting Author wishes to make the Work available on an Open Access basis (and intends to pay the relevant APC), the terms of reuse of such Open Access shall be governed by a Creative Commons licence – details of these licences and which [Creative Commons](#) licence will apply to this Work are set out in our licence referred to above.

Other than as permitted in any relevant BMJ Author's Self Archiving Policies, I confirm this Work has not been accepted for publication elsewhere, is not being considered for publication elsewhere and does not duplicate material already published. I confirm all authors consent to publication of this Work and authorise the granting of this licence.

# Examining the influence of price and income on global saturated fat intake: evidence from 160 countries

## Abstract

## Introduction

When considering proposals to improve diets, it is important to understand how factors like price and income can affect saturated fat intake and demand. This is even more important when considering economic interventions on a global scale. In this study, we examine and estimate the influence of price and income on intake across 160 countries, by age and sex, and derive sensitivity measures (price elasticities) that vary by age, sex, and geographic region.

## Methods

Secondary data were used for this analysis. Saturated fat intake data by age, sex, and country were obtained from the 2018 Global Dietary Database. These data were then linked to global price data for select food groups from the World Bank International Comparison Program and income data from the World Development Indicators Databank (World Bank). We estimated intake responsiveness to income and prices, accounting for differences by world region, age, and sex.

## Results

Intake differences due to price were highly significant, with a one percent increase in price associated with lower SF intake (% energy/d) of about 4.3 percentage points. We also find significant differences across regions. In high-income countries, median (age 40) intake reductions were 1.4, 0.8, and 0.2 percentage points, given a one-percent increase in the price of meat, dairy, and oils and fats, respectively. Price elasticities varied with age but not sex. Intake differences due to income were insignificant when regional binary variables were included in the analysis.

## Conclusion

The results of this study show heterogeneous associations among prices and intake within and across countries. Policymakers should consider these heterogenous effects as they address global nutrition and health challenges.

### Strengths and Limitations of this Study

- We derived detailed estimates of how price and income influence saturated fat intake across 160 countries, by age and sex.
- The strength of our analysis is the large country coverage, which is rarely seen in food and nutrition demand research, allowing for comparisons across population subgroups within and across countries.
- Our price and income measures were at the country level and could not account for within-country differences across population subgroups.
- The global price series used in this study was limited to primary contributing food categories and did not include, for instance, processed food prices.

## INTRODUCTION

While nutritional guidelines call for reductions in saturated fat (SF), the literature is not clear and remains controversial on the causal link between SF intake and cardiovascular disease risk and other health-related outcomes.(1-3) Studies note that different food sources of SF may have different relationships with risk, for example with higher risk for red meats and their fats, generally neutral relationships for dairy foods and their fats, and protective associations for plant oils.(4) In addition, low SF intake has been associated with higher mortality risk in studies comprising mostly low- and middle-income countries, and very low SF intake is associated with higher risk of hemorrhagic stroke, potentially due to increased cerebral vascular fragility.(3, 4)

Governments and international organizations have proposed economic interventions to improve diets and health outcomes.(5-8) Associated intake and health responses from the taxation of unhealthy foods has been the subject of many studies.(9-12) For instance, studies have considered the effectiveness of economic interventions to reduce the consumption of sugar-sweetened beverages (SSBs) and calorically dense foods across countries and cities over the past decade. However, the effectiveness of these economic interventions in reducing intake and improving health varies widely.(9, 13, 14) For instance, taxation in a particular jurisdiction could increase cross-border shopping (i.e., purchasing outside of the jurisdiction) or substitutions for unhealthy, untaxed alternatives.(9, 13)

In considering these proposals to improve diets, it is important to understand how factors like price and income influence SF intake and demand.(6, 15-17) Sensitivity to prices of SF-source foods could vary by per capita income, age, sex, educational attainment, etc. This relationship may also vary by world region, given differing cultural preferences, with important implications for health policy interventions.(18-20) However, to-date, no evidence exists on the

1  
2  
3 global income and price sensitivity of SF intake, nor potential variation by important  
4 demographic characteristics. Other than a few noted exceptions, global assessments of SF intake  
5 have been limited, particularly when considering price and income effects.(21, 22)  
6  
7  
8  
9

10 To help address these knowledge gaps, this investigation assessed how price and country  
11 income relate to SF intake. We used nationally representative intake estimates from the 2018  
12 Global Dietary Database to estimate how per capita income and prices jointly relate to SF intake  
13 by age and sex globally. Since nutrients are found in food, examinations of nutrient demand  
14 must consider food source demand, with price and income as explanatory variables.(23-25)  
15 Using price and expenditure data from the World Bank International Comparison Program, we  
16 constructed a global price series based on three food categories: meat, dairy, and oils and fats.  
17 This series sufficiently explained SF intake differences across countries and allowed for  
18 assessing the relationships of per capita income and price in each food category.  
19  
20  
21  
22  
23  
24  
25  
26  
27  
28  
29  
30  
31  
32

## 33 **METHODS**

### 34 **Data and sources**

35 We used secondary data sources for the analysis. SF intake data measured in percent of total  
36 energy per day (% energy/d) for a representative individual was obtained from the 2018 Global  
37 Dietary Database (GDD). The GDD, maintained by the Global Nutrition and Policy Consortium  
38 at Tufts Friedman School of Nutrition Science and Policy provides comprehensive and  
39 comparable dietary intakes for major foods and nutrients in 185 countries and territories. The  
40 GDD was developed using systematic searches of available survey data of individual-based  
41 dietary intakes for key food and nutrient categories at the national and subnational level. GDD  
42 intake estimates are based on the results of existing surveys (1,248 in total), representing 188  
43  
44  
45  
46  
47  
48  
49  
50  
51  
52  
53  
54  
55  
56  
57  
58  
59  
60

1  
2  
3 countries and approximately 99% of the global population. It is the first database to provide  
4  
5 estimates of daily consumption levels by food or nutrient category and contains representative  
6  
7 individual intake data by age (0-1 year, 1-2 years, 2-5 years, and then by increments of 5 years to  
8  
9 age 97.5) and sex.(26) The GDD also disaggregates individual intakes by three education levels  
10  
11 and residence (urban and rural). The GDD data estimation process included extensive  
12  
13 communication with researchers and government authorities and large subnational surveys, when  
14  
15 other options were are unavailable (27, 28). For details on the GDD coverage, data  
16  
17 methodology, and data collection, see:  
18  
19

20  
21 <https://www.globaldietarydatabase.org/methods/summary-methods-and-data-collection>.  
22  
23

24 National food expenditure and price data from the World Bank International Comparison  
25  
26 Program (ICP) were used to derive a SF price series. Although our intake measure is  
27  
28 comprehensive and inclusive of all food sources, the price series used for the analysis was  
29  
30 limited to the primary contributing food categories: meats, dairy, and oils and fats. The price  
31  
32 series for the *meats* category in the ICP database is an aggregation of the following: beef and  
33  
34 veal; pork; lamb, mutton, and goat; poultry; and other meats and meat preparations. *Dairy* –  
35  
36 fresh milk; preserved milk and other milk products; cheese and curd; and eggs and egg-based  
37  
38 products. *Oils and fats* – butter and margarine; and other edible oils and fats (29). Although  
39  
40 saturated fat is readily found in a wide array of foods, these categories have been identified as  
41  
42 major contributors to saturated fatty acids in diets.(30) While other foods, such as sweet and  
43  
44 savory snacks, also contribute and are included in our SF intake variable, global price series for  
45  
46 these food categories are not widely available.  
47  
48  
49

50  
51 The ICP is a global initiative that estimates purchasing power parities (PPPs) and price  
52  
53 level indices (PLIs) across countries, which allows for global comparisons of spending and  
54  
55  
56  
57

1  
2  
3 economic wellbeing. PPPs are spatial price deflators that make it possible to compare  
4 expenditures across economies.(31) PLIs are PPPs standardized to a common currency  
5 (generally the U.S Dollar) or indexed to a global average or base country.(32) The most recent  
6 ICP data round (2017) included comparative prices and expenditure data from 176 participating  
7 economies.(32)

8  
9  
10 For income, we used 2018 PPP-adjusted, gross domestic product (GDP) per capita from  
11 the World Development Indicators (WDI) database. Because differences in currency values and  
12 exchange rates do not always consistently reflect price-level differences across countries, PPP-  
13 adjusted GDP allowed for cross-country comparisons because overall price disparities across  
14 countries are taken into account.(33)

15  
16  
17 The analysis was limited to the 160 countries represented in all three databases (GDD,  
18 ICP, and WDI), which are listed in Supplementary Table 1 by geographic region (see the  
19 Supplemental Appendix): East Asia, Southeast Asia, and the Asian Pacific (Asia) (14 countries);  
20 Central and Eastern Europe and Central Asia (CEE) (27 countries); Latin America and  
21 Caribbean (LAC) (29 countries); Middle East and North Africa (MENA) (17 countries); South  
22 Asia (S-Asia) (7 countries); Sub-Saharan Africa (SSA) (43 countries), and High-Income/Western  
23 Countries (HIC) (24 countries). HIC is an aggregation of high-income countries in the Western  
24 hemisphere, Australia, and New Zealand, with the addition of a few surrounding islands.  
25 Countries without data in any of the three databases were excluded.

26  
27  
28 See the Supplemental Appendix for a more detailed discussion of the price, expenditure,  
29 and income data by geographic region.

## 30 31 32 33 34 35 36 37 38 39 40 41 42 43 44 45 46 47 48 49 50 51 52 53 54 **Patient and public involvement**



1  
2  
3 We used secondary data for this study. All data are publicly available and did not require direct  
4 patient involvement in the study design or implementation.  
5  
6  
7

### 8 9 10 **Model and estimation**

11  
12 To estimate SF intake demand, we used a semi-log functional form that has been proven to be  
13 consistent with economic theory and rational consumer behavior.(34, 35) Many studies have  
14 used a double-log form.(36) However, a problem with the double-log form is that significant  
15 intake differences across subgroups can be lost in log conversions. A semi-log relationship  
16 allowed for a better assessment of subgroup effects on intake responsiveness. Also, it has been  
17 shown that semi-log models contain the necessary information for obtaining, for instance,  
18 reliable measures of consumer welfare and the underlying preference structure of consumers.(34)  
19 Prior studies have also used a demand-system approach, primarily due to the adding-up property  
20 when using expenditure data (i.e., expenditures on all food categories “add up” to total food  
21 expenditures), which results in the error terms being correlated across equations specific to each  
22 food category. Since this relationship does not exist with individual intakes, particularly when  
23 the correspondence between purchases and intakes is not one to one, we can estimate intake  
24 demand for a single food or nutrient category separately.(37, 38)  
25  
26  
27  
28  
29  
30  
31  
32  
33  
34  
35  
36  
37  
38  
39  
40  
41

42 Let  $q_{gC}$  represent the % energy/d from saturated fat for demographic subgroup  $g$  ( $g$ : sex  
43 and age) in country  $C$  and let  $p_C$  represent the price level index for the contributing food  
44 categories in country  $C$ . Let  $Y_C$  and  $P_C$  represent real per capita income and the food price level  
45 index, respectively, in country  $C$ . Given these terms, the following model was used to estimate  
46 the relationship between intake, income, and prices:  
47  
48  
49  
50  
51  
52  
53  
54  
55  
56  
57  
58  
59  
60

$$q_{gC} = \beta_0^* + \beta_1^* \ln(Y_C) + \beta_2^* \ln\left(\frac{p_C}{P_C}\right) + u_{gC}. \quad (1)$$

The  $\beta_k^*$  terms [ $k = \{0,1,2\}$ ] are parameters to be estimated and  $u_{gC}$  is a random error term. Note that the price term is defined by the price of contributing food categories ( $p_C$ ) relative to overall food prices ( $P_C$ ). Thus, the model discounts any price differences across countries due to differences in overall food prices and implicitly accounts for the cross-price effects of other foods. For instance, if dairy prices were the same in two countries, but overall food prices differed, intake would be greater in the country with the higher food-price level since dairy is *relatively* cheaper when compared to food overall. Note that equation (1) does not include higher order income and price effects (e.g., quadratic income and price-income interactions). In preliminary analysis, these higher-order terms were highly insignificant, which implied that price or income responsiveness did not depend on the level of per-capita income level.

Using equation (1), we estimated intake demand using a procedure that allowed for error correlations among observations from the same country (i.e., country-clustered errors).<sup>(39)</sup> To account for differences in preferences across countries due to cultural differences or other related factors, we included regional binary variables in the analysis (ASIA, CEE, LAC, MENA, S-ASIA, and SSA). We accounted for age and sex by allowing these factors to have a direct effect on intake, as well as an additional effect through income and prices. Thus, the beta terms ( $\beta_k^*$ ) were expanded to account for age and sex interactions:  $\beta_k^* = f(\text{sex}, \text{age}) \forall k$ . Further disaggregations (education level and residence) were not considered due to estimation concerns resulting from negligible differences in SF intake across these factors. Although we used a single price index ( $p_C$ ) to represent the three food categories (meats, dairy, and oils and fats),

intake responsiveness with respect to the price of each food category were easily derived.

Defining the conditional expenditure share and price for the  $i$ th food category in country  $C$  as  $s_{iC}$

and  $p_{iC}$ , respectively,  $p_C$  is as follows:  $p_C = \sum_i s_{iC} p_{iC}$ . Thus, relationships between  $q_{gC}$  and  $p_{iC}$

were derived using the estimate on the price term in equation (1) ( $\beta_2^*$ ) and the conditional

expenditure share  $s_{iC}$  as follows:  $\frac{\partial q_{gC}}{\partial p_{iC}} = \frac{\partial q_{gC} \partial p_C}{\partial p_C \partial p_{iC}} = \frac{\beta_2^*}{p_C} s_{iC}$ .

## RESULTS

### Descriptive statistics and SF intake overview

Table 1 shows the descriptive statistics for the variables used in the model. Mean SF intake across all observations was 10.3% energy/d and ranged from 2.39 to 27.28. PPP-adjust real GDP per capita ranged from \$780 to \$117,245 (mean = \$22,226). The deflated price index ( $\frac{p_C}{P_C}$ ) ranged from 0.71 to 1.40 (mean = 1.00). Mean values for the region and sex variables reflect the country and subgroup representation in the data.(26, 33)

Figure 1 contains violin plots for SF intake by sex, age, and region based on all observations ( $n = 7,040$ ). Violin plots use kernel densities to visualize the distribution of intake. The width of the violin plot corresponded to the probability of an observation taking a specific value of SF intake and the vertical black line in each violin plot corresponds to the median value. In general, the violin plots showed that the distribution of SF is similar across age and sex subgroups, although there was greater variation across regions. Additionally, the presence of long right tails across most subgroups suggested the presence of outliers with very high values of SF intake.(26)

1  
2  
3 While the median value for SF intake was around 10.60 % energy/d, there were notable  
4 differences (Figure 1). Median SF intake was slightly higher in females (females = 10.88,  
5 males=10.40). Across regions, median SF intake was lowest in S-Asia (6.42) and highest in HIC  
6 (13.78). Overall, the maximum value for saturated fat intake occurred in the Philippines (27.48)  
7 amongst female infants (< 1 year old), while the overall minimum occurred in Nepal (2.39)  
8 amongst females between the ages of 20 and 25. Even within regions, notable differences  
9 occurred. In HIC, for instance, intake ranged from a high of 23.02 % energy/d in France  
10 amongst female infants to 9.45 % energy/d in Portugal amongst males, age 95 years and  
11 older.(26)  
12  
13  
14  
15  
16  
17  
18  
19  
20  
21  
22  
23  
24  
25

### 26 **Estimation results**

27  
28 We first estimated the model using intake values at the country level (i.e., intake averaged over  
29 all demographic subgroups) ( $n = 160$ ) (See Supplemental Table 2). Since our explanatory  
30 variables (price and income) were country specific and did not vary with demographic  
31 subgroups, it was useful to examine the significance of price or income without age and sex  
32 differences. The country-level analysis also revealed the importance of each variable in  
33 explaining global differences in SF intake. For instance, Model 1 showed that regional  
34 differences accounted for a large share of intake differences across countries (Adjusted  $R^2 =$   
35 0.39). When regional differences were not accounted for, both income (1.03,  $p < 0.01$ ) (Model  
36 2) and price (-3.90,  $p < 0.05$ ) (Model 3) were significant. When regional differences were  
37 accounted for (Model 4), price was still significant (-4.33,  $p < 0.05$ ), but income was  
38 insignificant. The negative price estimate was consistent with economic theory (higher prices  
39  
40  
41  
42  
43  
44  
45  
46  
47  
48  
49  
50  
51  
52  
53  
54  
55  
56  
57  
58  
59  
60

1  
2  
3 being associated with lower intake) and indicated that a unit increase in the log of price was  
4  
5 associated with lower SF intake by 4.33 percentage points.  
6

7  
8 Since the intake variable was measured as a percent, it is important to clarify the  
9  
10 difference between a percentage point change and percent change. For instance, intake falling  
11  
12 from 10.83 to 6.50 % energy/d, is a 4.33 percentage point decline, but a 40% decline:  $-4.33 \div$   
13  
14 10.83). This distinction is important when considering elasticity relationships where both intake  
15  
16 and prices are measured in percentage. Assuming mean intake (10.83 % energy/day) as the base,  
17  
18 intake falling by 4.33 percentage points or 40% given a unit change in the log of price (a two-  
19  
20 fold increase) suggested a price elasticity of about -0.40. That is, SF intake declines by 0.40%  
21  
22 for every 1.0% increase in price, which indicates minimal price sensitivity and inelastic demand.  
23  
24 Note that this result is based on a price increase across all food categories in the price series. As  
25  
26 discussed later in this section, intake responsiveness to the price of a particular food category  
27  
28 (e.g., dairy) was smaller.  
29  
30  
31

32  
33 Estimation results for the full model (Model 4) are reported in Table 2. Other than ASIA,  
34  
35 SF intake was significantly lower in all regions relative to HIC intake. Intake also decreased  
36  
37 with higher age ( $-0.10, p < 0.01$ ), but this effect was less significant with older adults. Results  
38  
39 (Model 4) indicated a price effect of  $-7.16 (p < 0.01)$ , where the magnitude became smaller with  
40  
41 age ( $0.20, p < 0.01$ ), but then increased for older populations. There was no significant  
42  
43 difference in the price effect by sex – and like the country-level analysis – the income effect on  
44  
45 intake was insignificant when regional differences were considered. Consequently, we did not  
46  
47 examine income effects in detail and the price-specific measures that follow are not specific to  
48  
49 sex.  
50  
51  
52  
53  
54  
55  
56  
57

### **Intake responsiveness and food prices**

Using the country-level estimates from Supplemental Table 2, we derived measures of aggregate intake change with respect to price changes specific to the food categories in the SF price series (meat, dairy, and oils and fats) (Figure 2). Note that our dependent variable is SF intake from all foods, including ultra-processed food. Thus, the price effects reported in this section measure how changes in the price of meat (e.g.) affect total SF intake, not just SF intake from meat. An increase in the meat price index resulted in the largest intake decrease: -2.47 percentage points from a two-fold increase in price (IQR: -2.29 to -2.78). Assuming mean intake as the base, this implied a price elasticity of about -0.23 (i.e., a 0.23% decline for every 1.0% increase in meat prices). The next highest intake decrease was in response to the dairy price index (-1.30 percentage points and IQR: -1.01 to -1.56), implying a price elasticity of -0.12. The results for oils and fats indicate the lowest intake response to a price change (-0.55 percentage point change and IQR: -0.29 to -0.65); the elasticity with respect to the price of oils and fats is about -0.06.

Using the estimates from Table 2, we assessed intake responsive by food category, age, and region (See Figure 3). Across regions, meat prices resulted in the largest variation in SF intake, with S-Asia being the only exception. In HIC, for instance, median SF intake reductions at age 40 were 1.37, 0.78, and 0.15 percentage points, for 1% higher prices of meat, dairy, and oils and fats, respectively. In contrast, intake reductions in S-Asia at age 40 were highest for dairy prices (1.14 percentage points) followed by meat prices (0.62 percentage points) and then the price of oils and fats (0.48 percentage points). However, the IQR overlap for meat and dairy in S-Asia suggested that intake responsiveness to these two prices was not significantly different.

Across regions, there were key differences in intake responsiveness with respect to price changes. In HIC, there was no IQR overlap, suggesting significantly higher intake

1  
2  
3 responsiveness to meat prices when compared to dairy prices, and dairy prices compared to the  
4 price of oils and fats. Similar patterns were observed for CEE, LAC, and MENA. In SSA,  
5  
6 however, intake changes from meat prices were significantly larger, but the estimates for dairy  
7  
8 and oils and fats prices show considerable IQR overlap.  
9  
10

11  
12 Results also indicated that middle-aged groups (age 40-60 years) were the least sensitive  
13  
14 to price changes. This was consistent with expectations as the middle-aged often have higher  
15  
16 incomes and may be less sensitive to price changes. Based on the “All Countries” estimates  
17  
18 (upper left panel), the median intake response from a two-fold increase in meat prices was -2.10  
19  
20 percentage points (age 20), responsiveness then decreased to -1.32 percentage points by age 50,  
21  
22 and then increased to -2.71 percentage points by age 80. There was a similar pattern for dairy  
23  
24 and oils and fats prices, but the differences between age groups were not as large.  
25  
26  
27  
28  
29

## 30 31 **DISCUSSION**

32  
33 This investigation provides evidence on how differences in income and food prices might jointly  
34  
35 influence SF consumption by sex and age across the spectrum of rich and poor countries. Both  
36  
37 the country-level and disaggregated (age and sex) analysis indicated that intake differences due  
38  
39 to income were insignificant. These results suggest that intake differences across countries are  
40  
41 better explained by regional dissimilarities and not economic wellbeing as measured by per-  
42  
43 capita income. In contrast, differences due to food prices were highly significant. Globally, a  
44  
45 one-percent increase in prices was estimated to decrease SF intake by about 0.40%. Across  
46  
47 regions, meat-price sensitivity of SF intake was relatively high, except for S-Asia where dairy  
48  
49 price sensitivity of SF intake was higher. Within regions and by age, price sensitivity was lowest  
50  
51 among middle-aged adults.  
52  
53  
54  
55  
56  
57  
58  
59  
60

1  
2  
3 The higher sensitivity of SF intake to price changes in meat consumption suggests that  
4 fiscal policies focused on a reducing SF intake would be more effective through meat-price  
5 interventions. That said, the magnitudes of price sensitivity were small, indicating relatively  
6 inelastic demand. Thus, high taxes would be needed to reduce intake: for example, global  
7 findings suggest that a two-fold increase in meat prices (i.e., a 100% tax) is associated with  
8 decreased intake of only 2.47 percentage points. Our results are consistent with previous  
9 findings. Research has shown that fat taxes in Denmark, Hungary, and France had small and  
10 ambiguous effects on demand.(40, 41) A similar outcome was observed from the Danish fat tax  
11 experience that targeted dairy and vegetable fat sources.(42)  
12  
13  
14  
15  
16  
17  
18  
19  
20  
21  
22  
23

24 The findings in this study can help to inform strategies that counter worsening diets.  
25 However, our modeling cannot prove causality of price changes on intake, and thus our findings  
26 should be interpreted cautiously when informing interventions and evaluations. Furthermore, the  
27 invariability of price and income across demographic subgroups ignores differences within  
28 countries and may have affected results, although we address this issue, in part, with age and sex  
29 variable interactions. Although the lack of price data for other food categories limited our ability  
30 to parse out other intake-price relationships, to the degree that our derived SF price series based  
31 on meat, dairy, and oils and fats is representative of a “true” global SF price the aggregate price  
32 effects could be applied to other food categories.  
33  
34  
35  
36  
37  
38  
39  
40  
41  
42  
43

44 The benefit of our analysis is the country coverage. While relationships between income,  
45 prices, and food choice have been studied, combining GDD, World Bank, and ICP data allowed  
46 for a global coverage rarely seen in food and nutrition research, allowing for comparisons across  
47 individuals in rich and poor countries and an examination of intake responsiveness by age and  
48 sex.(37, 38)  
49  
50  
51  
52  
53  
54  
55  
56  
57



## CONCLUSION

Our results provide novel global evidence on how income and prices influence SF intake by region, age, and sex. Our results confirm that the effectiveness of price interventions would be limited in most countries but provide evidence where interventions would be most effective if implemented (meat versus dairy or oils and fats; youth, young adults, and the elderly). These observed relationships can assist policymakers as they consider how pricing policies can be leveraged to tackle nutrition challenges.

**Table 1. Descriptive statistics for study variables**

| Variable                  | Measure           | Mean     | Std. Dev. | Min   | Max       |
|---------------------------|-------------------|----------|-----------|-------|-----------|
| SF intake                 | % energy/d        | 10.83    | 3.09      | 2.39  | 27.48     |
| Female                    | Binary            | 0.50     | 0.50      | 0     | 1         |
| Age                       | 5-year intervals* | 45.6     | 30.83     | 1     | 98        |
| ASIA                      | Binary            | 0.09     | 0.29      | 0     | 1         |
| CEE                       | Binary            | 0.17     | 0.37      | 0     | 1         |
| HIC                       | Binary            | 0.15     | 0.36      | 0     | 1         |
| LAC                       | Binary            | 0.18     | 0.39      | 0     | 1         |
| MENA                      | Binary            | 0.10     | 0.30      | 0     | 1         |
| S-ASIA                    | Binary            | 0.04     | 0.20      | 0     | 1         |
| SSA                       | Binary            | 0.27     | 0.44      | 0     | 1         |
| Real GDP per capita (PPP) | \$/person         | \$22,226 | \$21,646  | \$780 | \$117,245 |
| Deflated price            | index (US=1)      | 1.00     | 0.12      | 0.71  | 1.40      |

SF is saturated fat. Note that  $n = 7,040$  (160 countries  $\times$  44 demographic subgroups);  $n = 160$  for the GDP and price index. East and Southeast Asia (ASIA), Central and Eastern Europe and Central Asia (CEE), Latin America and Caribbean (LAC), Middle East and North Africa (MENA), South Asia (S-ASIA), Sub-Saharan Africa (SSA), and High-Income Countries/Rest of World (HIC). PPP is purchasing power parity.

**Table 2 Saturated fat intake estimates using country and demographic (sex and age) level data (n = 7,040)**

|                          | Model 1         | Model 2          | Model 3         | Model 4         |
|--------------------------|-----------------|------------------|-----------------|-----------------|
| Constant                 | 14.64 (0.39)*** | 2.81 (1.73)      | 12.44 (2.89)*** | 12.01 (2.90)*** |
| ASIA                     | -2.20 (1.14)*   |                  | -1.61 (1.12)    | -1.61 (1.12)    |
| CEE                      | -1.94 (0.48)*** |                  | -1.68 (0.51)*** | -1.68 (0.51)*** |
| LAC                      | -3.97 (0.49)*** |                  | -4.09 (0.65)*** | -4.09 (0.65)*** |
| MENA                     | -3.98 (0.52)*** |                  | -3.35 (0.55)*** | -3.35 (0.55)*** |
| S-ASIA                   | -7.26 (1.00)*** |                  | -6.08 (1.08)*** | -6.08 (1.08)*** |
| SSA                      | -4.03 (0.49)*** |                  | -3.47 (0.81)*** | -3.47 (0.81)*** |
| Female                   | 0.48 (0.04)***  | 0.48 (0.04)***   | 0.48 (0.04)***  | 0.06 (0.31)     |
| Age                      | -0.04 (0.01)*** | -0.04 (0.008)*** | -0.04 (0.01)*** | -0.10 (0.04)*** |
| Age <sup>2</sup>         | 0.00 (0.00)***  | 0.00 (0.00)***   | 0.00 (0.00)***  | 0.00 (0.00)***  |
| ln(Y)                    |                 | 0.93 (0.18)***   | 0.19 (0.26)     | 0.24 (0.27)     |
| Female × ln(Y)           |                 |                  |                 | 0.04 (0.04)     |
| Age × ln(Y)              |                 |                  |                 | 0.01 (0.00)     |
| Age <sup>2</sup> × ln(Y) |                 |                  |                 | 0.00 (0.00)***  |
| ln(P)                    |                 | -3.73 (1.59)***  | -4.32 (1.88)**  | -7.16 (2.29)*** |
| Female × ln(P)           |                 |                  |                 | -0.13 (0.14)    |
| Age × ln(P)              |                 |                  |                 | 0.20 (0.06)***  |
| Age <sup>2</sup> × ln(P) |                 |                  |                 | 0.00 (0.00)***  |
| Adjusted R <sup>2</sup>  | 0.34            | 0.18             | 0.36            | 0.37            |

Dependent variable is saturated fat intake in % energy/d. Robust standard errors (clustered by country) are in (parenthesis). \* $p \leq 0.10$ ; \*\* $p \leq 0.05$ ; \*\*\* $p \leq 0.01$ . East and Southeast Asia (ASIA), Central and Eastern Europe (CEE), Latin America and Caribbean (LAC), Middle East and North Africa (MENA), South Asia (S-ASIA), and Sub-Saharan Africa (SSA). Y is real GDP per capita, purchasing-power-parity adjusted. P is an inflation adjusted price index for meats, dairy products and eggs, and oils and fats.

## List of Figures

**Figure 1. Comparison of percentage energy from saturated fat among individuals in sex, age, and country-specific strata globally and across world regions.** Note that  $n = 7,040$  (160 countries  $\times$  44 demographic subgroups). Female  $n = 3,520$ ; male  $n = 3,520$ .

Age categories: Age $\leq 19$   $n = 1,920$ ; Age $\geq 60$   $n = 2,560$ ; for all other age groups  $n = 640$ ;  
Regions: South Asia  $n = 308$ ; Sub-Saharan Africa  $n = 1,892$ ; Central and Eastern Europe  $n = 1,188$ ; Middle East and North Africa  $n = 704$ ; Latin America and Caribbean  $n = 1,276$ ; High-Income Countries  $n = 1,056$ ; Asia  $n = 616$ .

Source: Global Dietary Database, 2018.

**Figure 2. Change in saturated fat intake when prices double for each food category.** Intake change values measure the change in % energy/d from saturated fat. Boxes denote the median value and IQR, error bars are min and max values, and data points are outliers.

**Figure 3. Change in saturated fat intake when prices double for each food category by select region and age.** Intake change values measure the change in % energy/d from saturated fat. Boxes denote the median value and IQR and error bars are min and max values.

### **Contributorship statement**

AA and AM contributed to the study conceptualization; JR, PS, JZ, FC, JEM VM, and DM contributed to data cu and data curation; AA and AM contributed to the methodology and economic analysis; AA, AM, JNY, DM contributed to writing (original draft); AA, AM, and JNY contributed to writing (review and editing); AA and AM are joint senior authors. Collaborators are listed in the supplemental appendix.

### **Competing interests**

There are no competing interests for any author.

### **Funding**

No funding organization contributed to this research.

### **Data sharing statement**

The expenditure and price data are available in a public, open access repository managed by the World Bank. The intake data can be obtained from the Global Dietary Database (GDD) through a data user agreement. The GDD is maintained by the Global Nutrition and Policy Consortium at Tufts Friedman School of Nutrition Science and Policy.

### **Ethical statement**

This study does not involve human participants.

## References

1. Forouhi NG, Krauss RM, Taubes G, Willett W. Dietary fat and cardiometabolic health: evidence, controversies, and consensus for guidance. *BMJ*. 2018;361.
2. Yu E, Hu FB. Dairy Products, Dairy Fatty Acids, and the Prevention of Cardiometabolic Disease: a Review of Recent Evidence. *Curr Atheroscler Rep*. 2018;20(5):24.
3. Siri-Tarino PW, Sun Q, Hu FB, Krauss RM. Meta-analysis of prospective cohort studies evaluating the association of saturated fat with cardiovascular disease. *The American Journal of Clinical Nutrition*. 2010;91(3):535-46.
4. Dehghan M, Mente A, Zhang X, Swaminathan S, Li W, Mohan V, et al. Associations of fats and carbohydrate intake with cardiovascular disease and mortality in 18 countries from five continents (PURE): a prospective cohort study. *The Lancet*. 2017;390(10107):2050-62.
5. Khan R, Misra K, Singh V. Will a Fat Tax Work? *Marketing Science*. 2016;35(1):10-26.
6. Powell LM, Chaloupka FJ. Food Prices and Obesity: Evidence and Policy Implications for Taxes and Subsidies. *The Milbank Quarterly*. 2009;87(1):229-57.
7. Powell LM, Chriqui JF, Wada R, Chaloupka FJ. Assessing the potential effectiveness of food and beverage taxes and subsidies for improving public health: a systematic review of prices, demand and body weight outcomes. *Obesity Reviews*. 2013;14(2):110-28.
8. World Health Organization. Fiscal Policies for Diet and the Prevention of Noncommunicable Diseases. Technical Meeting Report. Geneva, Switzerland: World Health Organization; 2016.
9. Aguilar A, Gutierrez E, Seira E. The effectiveness of sin food taxes: Evidence from Mexico. *Journal of Health Economics*. 2021;77:102455.
10. Blakely T, Cleghorn C, Mizdrak A, Waterlander W, Nghiem N, Swinburn B, et al. The effect of food taxes and subsidies on population health and health costs: a modelling study. *The Lancet Public Health*. 2020;5(7):e404-e13.
11. Caro JC, Ng SW, Taillie LS, Popkin BM. Designing a tax to discourage unhealthy food and beverage purchases: The case of Chile. *Food Policy*. 2017;71:86-100.
12. Cornelsen L, Mazzocchi M, Smith RD. Fat tax or thin subsidy? How price increases and decreases affect the energy and nutrient content of food and beverage purchases in Great Britain. *Social Science & Medicine*. 2019;230:318-27.
13. Cawley J, Thow AM, Wen K, Frisvold D. The Economics of Taxes on Sugar-Sweetened Beverages: A Review of the Effects on Prices, Sales, Cross-Border Shopping, and Consumption. *Annual Review of Nutrition*. 2019;39(1):317-38.

14. Popkin BM, Ng SW. Sugar-sweetened beverage taxes: Lessons to date and the future of taxation. *PLOS Medicine*. 2021;18(1):e1003412.
15. Andreyeva T, Chaloupka FJ, Brownell KD. Estimating the potential of taxes on sugar-sweetened beverages to reduce consumption and generate revenue. *Preventive Medicine*. 2011;52(6):413-6.
16. Andreyeva T, Long MW, Brownell KD. The impact of food prices on consumption: a systematic review of research on the price elasticity of demand for food. *American Journal of Public Health*. 2010;100(2):216-22.
17. Blaylock J, Smallwood D, Kassel K, Variyam J, Aldrich L. Economics, food choices, and nutrition. *Food Policy*. 1999;24(2-3):269-86.
18. Muhammad A, Seale JL, Meade B, Regmi A. International evidence on food consumption patterns: an update using 2005 international comparison program data. Washington, D.C.: Economic Research Service, USDA; 2011. Report No.: 1929.
19. Andrew M, Anna DS, Birgit M, Renata M, Dariush M. How income and food prices influence global dietary intakes by age and sex: evidence from 164 countries. *BMJ Global Health*. 2017;2(3):e000184.
20. Andrew M, Birgit M, David RM, Dariush M. Global patterns in price elasticities of sugar-sweetened beverage intake and potential effectiveness of tax policy: a cross-sectional study of 164 countries by sex, age and global-income decile. *BMJ Open*. 2019;9(8):e026390.
21. Elmadfa I, Kornsteiner M. Dietary Fat Intake – A Global Perspective. *Annals of Nutrition and Metabolism*. 2009;54(suppl 1)(Suppl. 1):8-14.
22. Micha R, Khatibzadeh S, Shi P, Fahimi S, Lim S, Andrews KG, et al. Global, regional, and national consumption levels of dietary fats and oils in 1990 and 2010: a systematic analysis including 266 country-specific nutrition surveys. *BMJ : British Medical Journal*. 2014;348:g2272.
23. Behrman JR, Wolfe BL. More evidence on nutrition demand: Income seems overrated and women's schooling underemphasized. *Journal of Development Economics*. 1984;14(1):105-28.
24. Huang KS. Nutrient Elasticities in a Complete Food Demand System. *American Journal of Agricultural Economics*. 1996;78(1):21-9.
25. Lancaster KJ. A New Approach to Consumer Theory. *Journal of Political Economy*. 1966;74(2):132.
26. [dataset] Global Nutrition and Policy Consortium. Global Dietary Database. 2022. <https://www.globaldietarydatabase.org/about-us>.

- 1
- 2
- 3 27. Khatibzadeh S, Saheb Kashaf M, Micha R, Fahimi S, Shi P, Elmadfa I, et al. A global
- 4 database of food and nutrient consumption. *Bull World Health Organ.* 2016;94(12):931-4.
- 5
- 6 28. Miller V, Reedy J, Cudhea F, Zhang J, Shi P, Erndt-Marino J, et al. Global, regional, and
- 7 national consumption of animal-source foods between 1990 and 2018: findings from the Global
- 8 Dietary Database. *Lancet Planet Health.* 2022;6(3):e243-e56.
- 9
- 10 29. World Bank. *Purchasing Power Parities and the Size of World Economies : Results from*
- 11 *the 2017 International Comparison Program.* Washington, DC: World Bank Group; 2020.
- 12
- 13
- 14 30. Huth PJ, Fulgoni VL, Keast DR, Park K, Auestad N. Major food sources of calories,
- 15 added sugars, and saturated fat and their contribution to essential nutrient intakes in the U.S. diet:
- 16 data from the national health and nutrition examination survey (2003–2006). *Nutrition Journal.*
- 17 *2013;12(1):116.*
- 18
- 19
- 20 31. World Bank. *Purchasing Power Parities and the Real Size of World Economies: A*
- 21 *Comprehensive Report of the 2011 International Comparison Program.* World Bank. 2015.
- 22
- 23 32. World Bank. *Purchasing Power Parities for Policy Making: A Visual Guide to Using*
- 24 *Data from the International Comparison Program.* Washington, DC: World Bank; 2021
- 25 *2021/06/10/.*
- 26
- 27
- 28 33. [dataset] World Bank. *World Development Indicators.* 2023.
- 29 <https://databank.worldbank.org/source/world-development-indicators>.
- 30
- 31 34. LaFrance JT. Incomplete demand systems and semilogarithmic demand models.
- 32 *Australian Journal of Agricultural Economics.* 1990;34(2):118-31.
- 33
- 34 35. von Haefen RH. A complete characterization of the linear, log-linear, and semi-log
- 35 incomplete demand system models. *Journal of Agricultural and Resource Economics.*
- 36 *2002;27(2):281-319.*
- 37
- 38 36. Sahn DE. The Effect of Price and Income Changes on Food-Energy Intake in Sri Lanka.
- 39 *Economic Development and Cultural Change.* 1988;36(2):315-40.
- 40
- 41
- 42 37. Muhammad A, D'Souza A, Meade B, Micha R, Mozaffarian D. How income and food
- 43 prices influence global dietary intakes by age and sex: evidence from 164 countries. *BMJ Global*
- 44 *Health.* 2017;2(3):e000184.
- 45
- 46 38. Muhammad A, Meade B, Marquardt DR, Mozaffarian D. Global patterns in price
- 47 elasticities of sugar-sweetened beverage intake and potential effectiveness of tax policy: a cross-
- 48 sectional study of 164 countries by sex, age and global-income decile. *BMJ Open.*
- 49 *2019;9(8):e026390.*
- 50
- 51
- 52 39. Cameron AC, Trivedi PK. *Microeconometrics: Methods and Applications.* Cambridge:
- 53 *Cambridge University Press; 2005.*
- 54
- 55
- 56
- 57
- 58
- 59
- 60



- 1  
2  
3 40. Allais O, Bertail P, Nichèle V. The Effects of a Fat Tax on French Households'  
4 Purchases: A Nutritional Approach. *American Journal of Agricultural Economics*.  
5 2010;92(1):228-45.  
6  
7  
8 41. Smed S, Scarborough P, Rayner M, Jensen JD. The effects of the Danish saturated fat tax  
9 on food and nutrient intake and modelled health outcomes: an econometric and comparative risk  
10 assessment evaluation. *European Journal of Clinical Nutrition*. 2016;70(6):681-6.  
11  
12 42. Vallgård S, Holm L, Jensen JD. The Danish tax on saturated fat: why it did not survive.  
13 *European Journal of Clinical Nutrition*. 2015;69(2):223-6.  
14  
15  
16  
17  
18  
19  
20  
21  
22  
23  
24  
25  
26  
27  
28  
29  
30  
31  
32  
33  
34  
35  
36  
37  
38  
39  
40  
41  
42  
43  
44  
45  
46  
47  
48  
49  
50  
51  
52  
53  
54  
55  
56  
57  
58  
59  
60

For peer review only

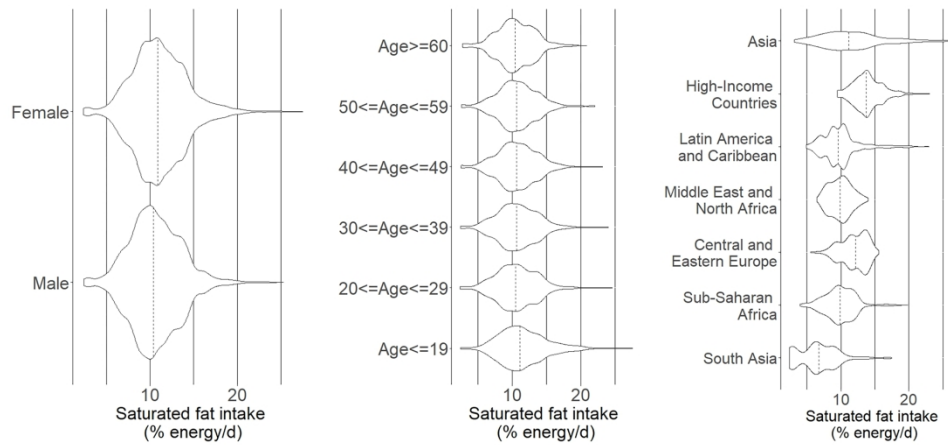

Figure 1. Comparison of percentage energy from saturated fat among individuals in sex, age, and country-specific strata globally and across world regions. Note that  $n = 7,040$  (160 countries  $\times$  44 demographic subgroups). Female  $n = 3,520$ ; male  $n = 3,520$ . Age categories: Age  $\leq 19$   $n = 1,920$ ; Age  $\geq 60$   $n = 2,560$ ; for all other age groups  $n = 640$ ; Regions: South Asia  $n = 308$ ; Sub-Saharan Africa  $n = 1,892$ ; Central and Eastern Europe  $n = 1,188$ ; Middle East and North Africa  $n = 704$ ; Latin America and Caribbean  $n = 1,276$ ; High-Income Countries  $n = 1,056$ ; Asia  $n = 616$ . Source: Global Dietary Database, 2018.

203x101mm (300 x 300 DPI)

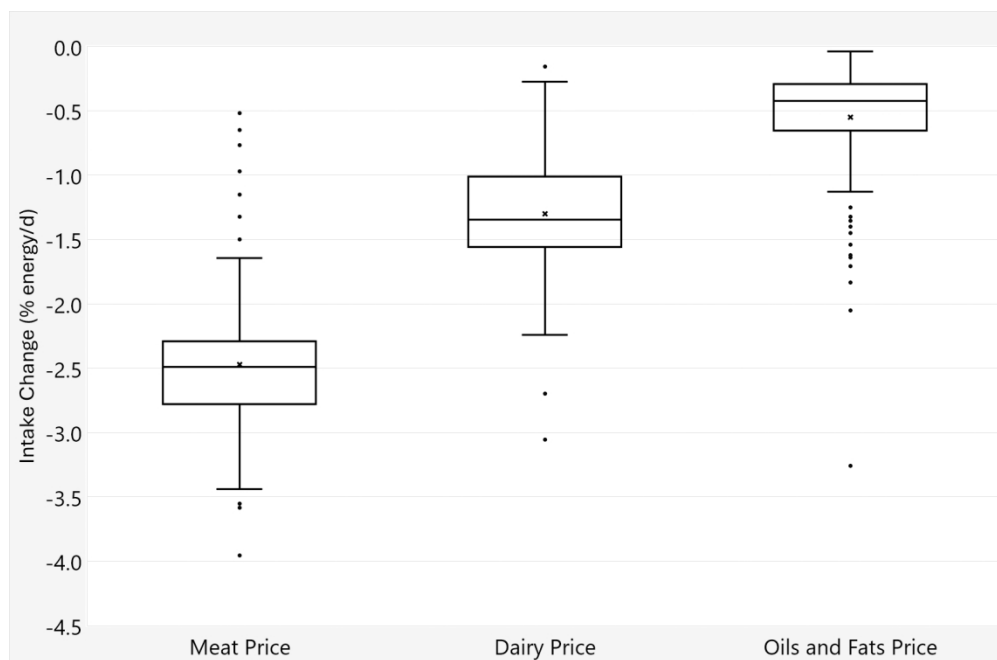

Figure 2. Change in saturated fat intake when prices double for each food category. Intake change values measure the change in % energy/d from saturated fat. Boxes denote the median value and IQR, error bars are min and max values, and data points are outliers.

145x94mm (300 x 300 DPI)

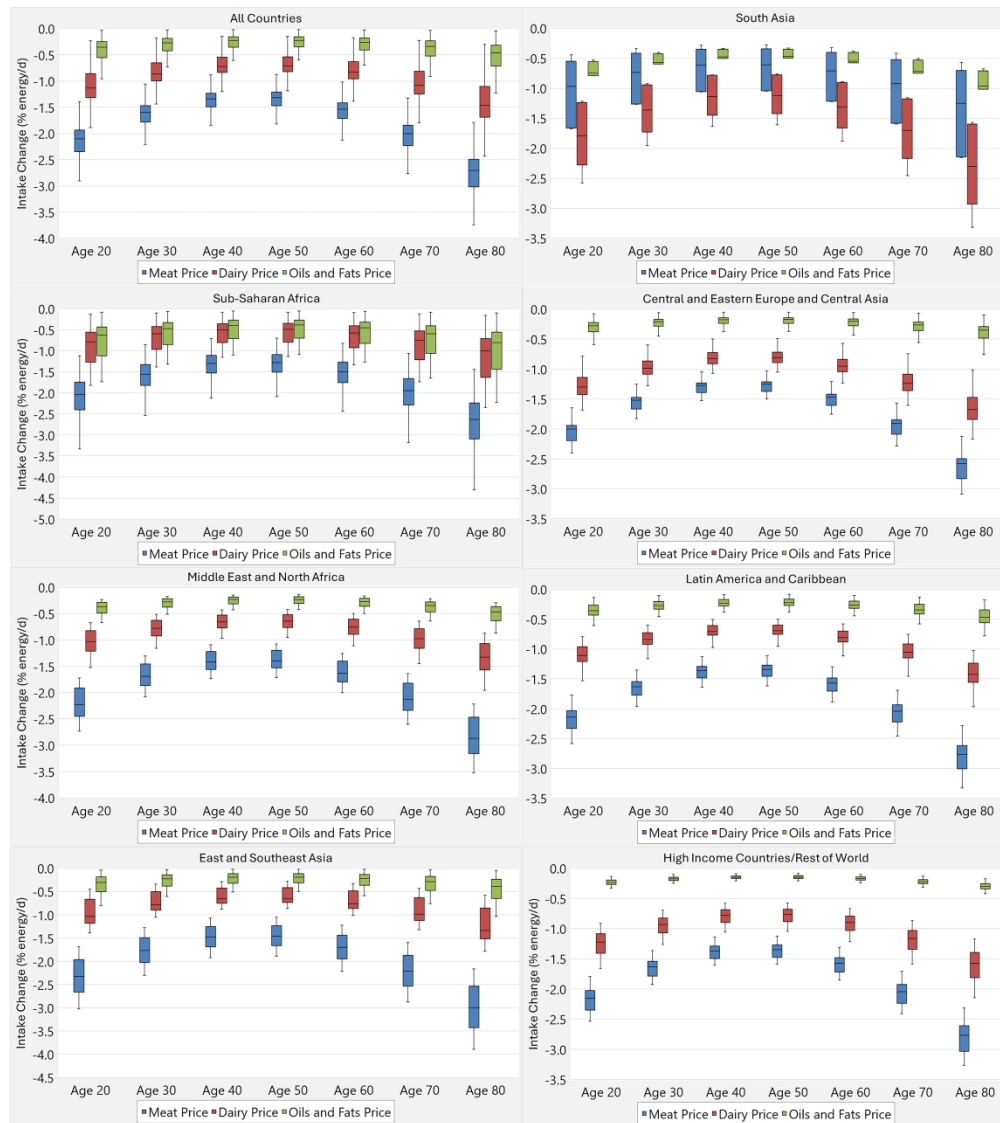

Figure 3. Change in saturated fat intake when prices double for each food category by select region and age. Intake change values measure the change in % energy/d from saturated fat. Boxes denote the median value and IQR and error bars are min and max values.

381x426mm (300 x 300 DPI)

## Supplemental Appendix

### Supplemental Table 1. Countries included in study by defined region

| Region                                                                      | Countries                                                                                                                                                                                                                                                                                                                                                                                                                                                        |
|-----------------------------------------------------------------------------|------------------------------------------------------------------------------------------------------------------------------------------------------------------------------------------------------------------------------------------------------------------------------------------------------------------------------------------------------------------------------------------------------------------------------------------------------------------|
| Southeast Asia, East Asia, and High-Income Asia Pacific (ASIA) 14 countries | Brunei Darussalam, Cambodia, China, Fiji, Indonesia, Japan, Laos, Malaysia, Myanmar, Philippines, Singapore, South Korea, Thailand, and Vietnam.                                                                                                                                                                                                                                                                                                                 |
| Central Europe, Eastern Europe, and Central Asia (CEE) 27 countries         | Albania, Armenia, Azerbaijan, Belarus, Bosnia and Herzegovina, Bulgaria, Croatia, Czech Republic, Estonia, Georgia, Hungary, Kazakhstan, Kyrgyz Republic, Latvia, Lithuania, Macedonia, Moldova, Mongolia, Montenegro, Poland, Romania, Russia, Serbia, Slovak Republic, Slovenia, Tajikistan, and Ukraine.                                                                                                                                                      |
| Latin America and the Caribbean (LAC) 29 countries                          | Antigua and Barbuda, Argentina, Bahamas, Barbados, Belize, Bolivia, Brazil, Chile, Colombia, Costa Rica, Dominica, Dominican Republic, Ecuador, El Salvador, Grenada, Guyana, Haiti, Honduras, Jamaica, Mexico, Nicaragua, Panama, Paraguay, Peru, St. Lucia, St. Vincent and Grenadines, Suriname, Trinidad and Tobago, and Uruguay.                                                                                                                            |
| Middle East and North Africa (MENA) 17 countries                            | Algeria, Bahrain, Egypt, Iran, Iraq, Israel, Jordan, Kuwait, Morocco, Oman, Qatar, Saudi Arabia, Tunisia, Turkey, United Arab Emirates, and West Bank and Gaza.                                                                                                                                                                                                                                                                                                  |
| South Asia (S-ASIA) – 7 countries                                           | Bangladesh, Bhutan, India, Maldives, Nepal, Pakistan, and Sri Lanka.                                                                                                                                                                                                                                                                                                                                                                                             |
| Sub-Saharan Africa (SSA) 43 countries                                       | Angola, Benin, Botswana, Burkina Faso, Burundi, Cabo Verde, Cameroon, Central African Republic, Chad, Comoros, Congo DR, Congo, Côte d'Ivoire, Djibouti, Equatorial Guinea, Eswatini, Ethiopia, Gabon, Gambia, Ghana, Guinea, Guinea Bissau, Kenya, Lesotho, Liberia, Madagascar, Malawi, Mali, Mauritania, Mauritius, Mozambique, Namibia, Niger, Nigeria, Rwanda, São Tomé and Príncipe, Senegal, Seychelles, Sierra Leone, Sudan, Tanzania, Togo, and Uganda. |
| High Income/Rest of World (HIC) 24 countries                                | Australia, Austria, Belgium, Canada, Cyprus, Denmark, Finland, France, Germany, Greece, Iceland, Ireland, Italy, Luxembourg, Malta, Netherlands, New Zealand, Norway, Portugal, Spain, Sweden, Switzerland, United Kingdom, and United States.                                                                                                                                                                                                                   |

**Supplemental Table 2. Saturated fat intake estimates using country level data ( $n = 160$ )**

|                         | Model 1         | Model 2        | Model 3         | Model 4         |
|-------------------------|-----------------|----------------|-----------------|-----------------|
| Constant                | 13.66 (0.46)*** | 1.03 (1.75)    | 10.81 (0.23)*** | 12.05 (2.87)*** |
| ASIA                    | -1.19 (0.76)    |                |                 | -0.66 (0.81)    |
| CEE                     | -1.36 (0.63)**  |                |                 | -1.16 (0.67)*   |
| LAC                     | -4.07 (0.62)*** |                |                 | -4.26 (0.74)*** |
| MENA                    | -3.43 (0.73)*** |                |                 | -2.85 (0.77)*** |
| S-ASIA                  | -7.41 (0.97)*** |                |                 | -6.34 (1.10)*** |
| SSA                     | -4.07 (0.58)*** |                |                 | -3.65 (0.90)*** |
| ln(Y)                   |                 | 1.03 (0.18)*** |                 | 0.14 (0.26)     |
| ln(P)                   |                 |                | -3.90 (1.94)**  | -4.33 (1.89)**  |
| Adjusted R <sup>2</sup> | 0.39            | 0.16           | 0.02            | 0.41            |

Dependent variable is saturated fat intake measured in % energy/d. Robust standard errors are in (parenthesis). \* $p \leq 0.10$ ; \*\* $p \leq 0.05$ ; \*\*\* $p \leq 0.01$ . East and Southeast Asia (ASIA), Central and Eastern Europe and Central Asia (CEE), Latin America and Caribbean (LAC), Middle East and North Africa (MENA), South Asia (S-ASIA), and Sub-Saharan Africa (SSA). Y is real GDP per capita, purchasing-power-parity adjusted. P is an inflation adjusted price index for meats, dairy products and eggs, and oils and fats.

## Income, Price, and Expenditure Data Across Countries

Supplemental Figures 1 – 3 contain box plots by region for the country-specific explanatory variables.

**Supplemental Figure 1** shows real GDP per capita (PPP) for the seven regions in our study. The highest GDP region is High-Income Countries, which is unsurprising. The median income for High-Income Countries was \$51,432 per person. In contrast, Sub-Saharan Africa had the smallest real GDP per capita, with a median value of \$3,147.

**Supplemental Figure 2** shows expenditure shares for the contributing food categories: meats, dairy, and oils and fats by region. Food expenditure shares were derived from the World Bank International Comparison Program (ICP) which allows for global spending comparisons by standardizing expenditures to a common currency (U.S. Dollars). Across regions, meat expenditures were the highest food expenditure category, except for South Asia. In South Asia, the median dairy food expenditure share was the highest at 0.47 and the interquartile range (IQR) was 0.34 to 0.60. Asia, Latin America and Caribbean, and Sub-Saharan Africa were the regions with the highest median expenditures for meats at 0.65 and an IQR from 0.55 to 0.74. South Asia has the lowest meat expenditure share at 0.31 with an IQR from 0.16 to 0.48. Apart from South Asia, dairy expenditure shares represented the second highest expenditure shares across regions. Oils and fats account for the smallest share of food expenditures compared to the other food categories for all regions.

**Supplemental Figure 3** shows the price indexes for meat, dairy, and oil and fats, and the weighted average price index (weighted based on the expenditures in Supplemental Figure 2) by region. The weighted average food price index is the sum of each price index times the expenditure share for the corresponding food category. Most regions exhibit relatively similar values across price index categories and shorter “whiskers” include Central and Eastern Europe, Middle East and North Africa, and South Asia. Alternatively, some regions (High-Income Countries, Latin America and Caribbean, and Sub-Saharan Africa) exhibit a greater range between the IQR and maximum and minimum values and greater variation in prices. For example, in the Latin American and Caribbean region, the dairy price index has a median value of 134.49 and IQR of 98.60 to 156.59. In contrast, the Central and Eastern Europe region has a dairy price index median value of 86.58 and IQR range of 75.84 to 93.50.

1  
2  
3  
4  
5  
6  
7  
8  
9  
10  
11  
12  
13  
14  
15  
16  
17  
18  
19  
20  
21  
22  
23  
24  
25  
26  
27  
28  
29  
30  
31  
32  
33  
34  
35  
36  
37  
38  
39  
40  
41  
42  
43  
44  
45  
46  
47

Supplemental Figure 1. Real GDP Per Capita (PPP) by Region

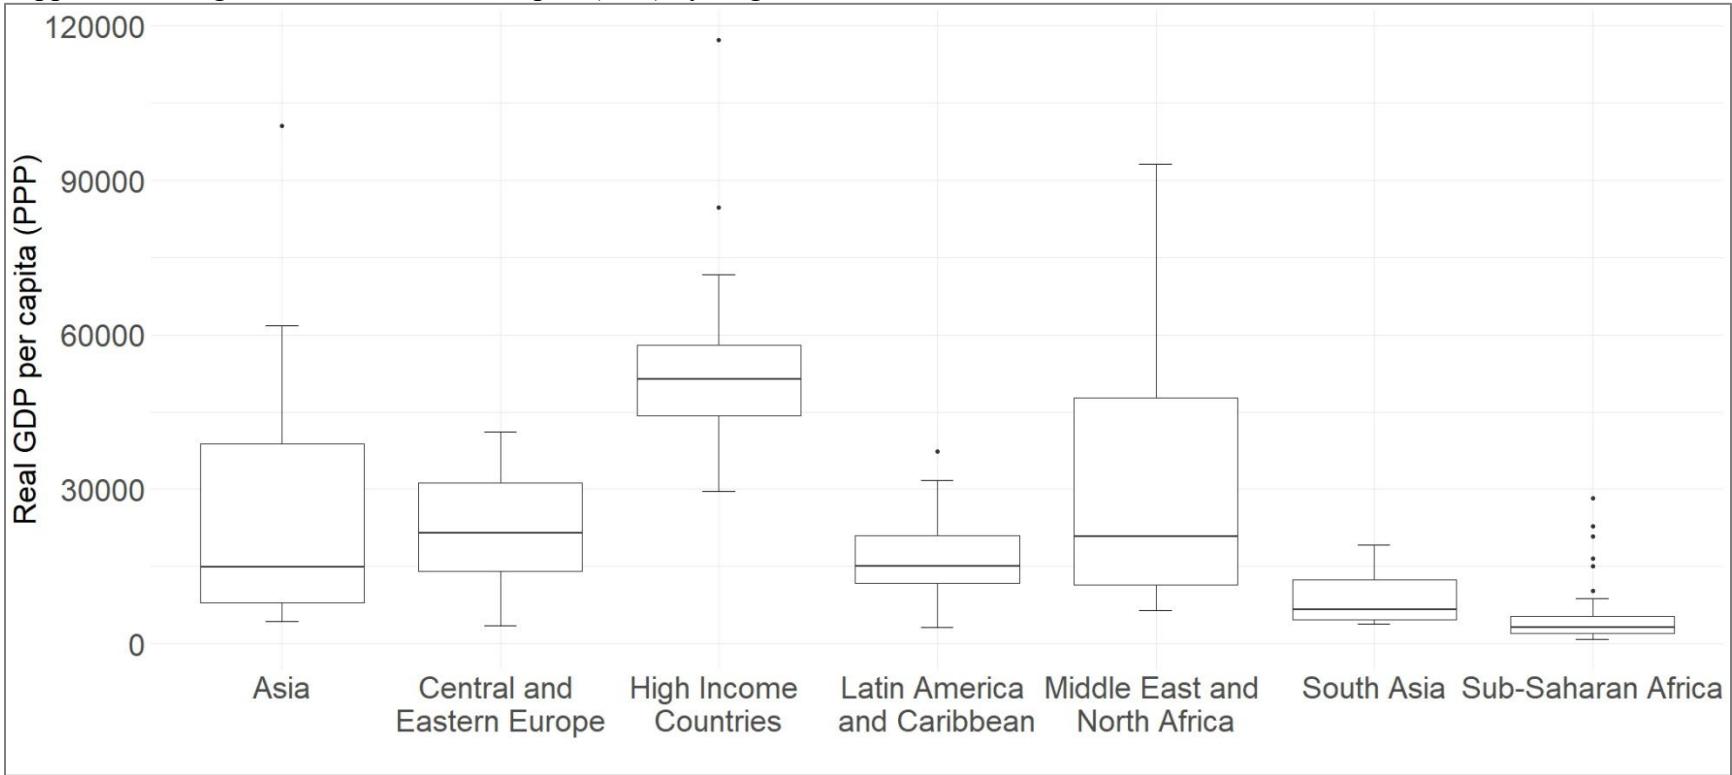

Source: Authors' estimates using income data from the World Bank Development Indicators.



Supplemental Figure 2. Food Expenditure Shares by Region

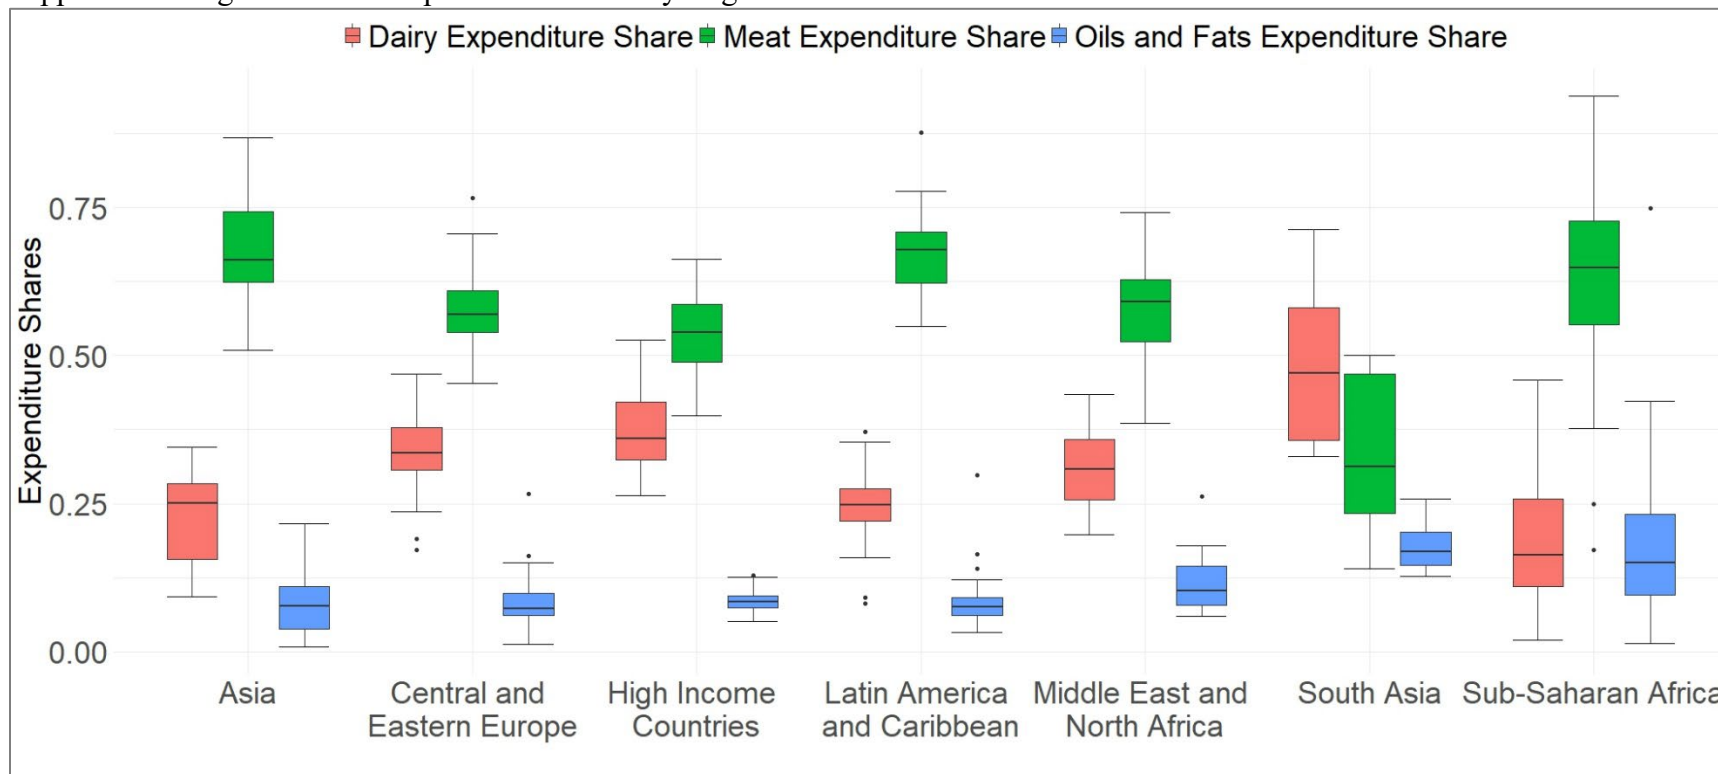

Source: Authors' estimates using income data from the World Bank International Comparison Program.

1  
2  
3  
4  
5  
6  
7  
8  
9  
10  
11  
12  
13  
14  
15  
16  
17  
18  
19  
20  
21  
22  
23  
24  
25  
26  
27  
28  
29  
30  
31  
32  
33  
34  
35  
36  
37  
38  
39  
40  
41  
42  
43  
44  
45  
46  
47

Supplemental Figure 3. Price Indexes for each Food Category and Weighted Average by Region

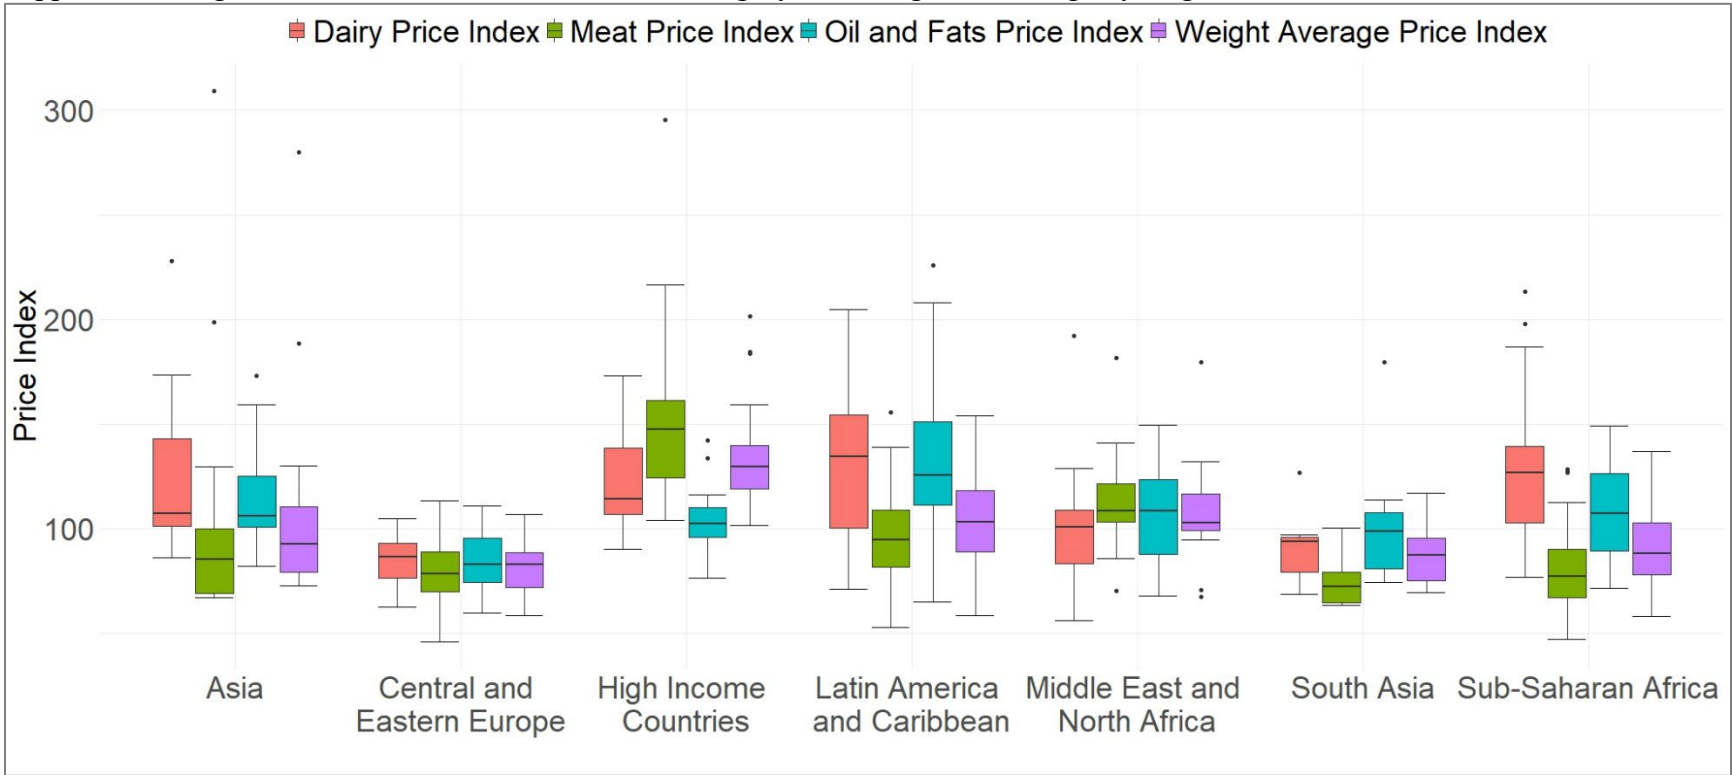

Source: Authors' estimates using income data from the World Bank International Comparison Program.

## Global Dietary Database Corresponding Members

Pamela Abbott, Director of the Centre for Global Development, University of Aberdeen, UK; Morteza Abdollahi, National Nutrition and Food Technology Research Institute (NNFTRI): SBMU; Parvin Abedi, Menopause Andropause Research Center, Ahvaz Jundishapur University of Medical Sciences; Suhad Abumweis, Al Ain University, Abu Dhabi, UAE; Linda Adair; Mohannad Al Nsour, Eastern Mediterranean Public Health Network: EMPHNET; Iftikhar Alam, BKUC.edu.pk; Nasser Al-Daghri and Dr. Shaun Sabico, King Saud University, Saudi Arabia; Nawal Ai, alHamad, Public Authority For Food and Nutrition, Kuwait; Suad Al-Hooti, Kuwait Institute for Scientific Research; Eman Alissa, King Abdulaziz University; Sameer Al-Zenki; Simon Anderson, University of Manchester; Karim Anzid, Cadi Ayyad University; Carukshi Arambepola, Faculty of Medicine, University of Colombo, Sri Lanka; Mustafa Arici, Hacettepe University Faculty of Medicine; Joanne Arsenault, FHI Solutions; Renzo Asciale; Lajos Biró; Noël Barengo, Herbert Wertheim College of Medicine; Simon Barquera, Juan Rivera Dommarco, Daniel Illescas-Zarate, Luz Maria Sánchez-Romero, Sonia Rodriguez Ramirez, and Ivonne Ramirez Silva, National Institute of Public Health (INSP), Mexico; Murat Bas, Acibadem University; Wulf Becker; Sigrid Beer-Borst; Per Bergman, Anna Karin Lindroos, Jessica Petrelius Sipinen, and Lotta Moraeus, Swedish National Food Agency; Sesikeran Boindala, National Institute of Nutrition India; Pascal Bovet, University Center for Primary Care and Public Health (Unisanté), Lausanne, Switzerland, and Ministry of Health, Seychelles; Debbie Bradshaw; Noriklil Bukhary Ismail Bukhary, Ministry of Health (Malaysia); Kanitta Bundhamcharoen; Mauricio T. Caballero, Fundacion INFANT and Consejo Nacional De Investigaciones Cientificas y Tecnicas (CONICET); Neville Calleja, Directorate for Health Information & Research; Xia Cao; Mario Capanzana, Food and Nutrition Research Institute, Department of Science and Technology; Jan Carmikle, Senior Intellectual Property Office; Katia Castetbon, Institut de Veille Sanitaire; Michelle Castro, Departamento de Alimentação Escolar; Corazon Cerdana; Hsing-Yi Chang, National Health Research Institutes; Karen Charlton; Yu Chen, NYU School of Medicine; Shashi Chiplonkar, HC Jehangir Medical Research Institute, Pune India; Yoonsu Cho, Korea University; Khun-Aik Chuah; Simona Costanzo, Marialaura Bonaccio, and Licia Iacoviello, IRCCS INM Neuromed; Melanie Cowan; Albertino Damasceno, Faculty of Medicine, Eduardo Mondlane University, Maputo, Mozambique; Saeed Dastgiri, Tabriz University of Medical Sciences; Stefaan De Henauw and Carl Lachat, Ghent University, Belgium; Karin DeRidder, Belgian Public Health Institute; Eric Ding, Harvard School of Public Health; Rokiah Don; Charmaine Duante; Vesselka Duleva, National Center for Public Health, Sofia, Bulgaria; Samuel Duran Aguero, Universidad San Sebastian, Chile; Veena Ekbote, Hirabai Cowasji Jehangir Medical Research Institute, Jehangir Hospital, Pune, India; Jalila El Ati, National Institute of Nutrition and Food Technology & SURVEN RL; Alison Eldridge, Nestle Research Center; Tatyana El-kour and Laetitia Nikiema, World Health Organization (WHO); Ibrahim Elmadfa, University of Vienna; Helene Enghardt Barbieri; Alireza Esteghamati, Tehran University of Medical Sciences; Zohreh Etemad, Dutch National Institute for Public Health and the Environment (RIVM); Fariza Fadzil, Ministry of Health, Malaysia; Farshad Farzadfar; Mei Fen Chan; Anne Fernandez, Perdana University, Royal College of Surgeons in Ireland; Dulitha Fernando; Regina Fisberg, University of Sao Paulo, Brazil; Simon Forsyth, The University of Queensland School of Public Health; Edna Gamboa Delgado, Fundacion Cardiovascular de Colombia; Didier Garriguet, Statistics Canada; Jean-Michel Gaspoz; Dorothy Gauci; Johanna M. Geleijnse, Wageningen University; Brahmam Ginnela;

1  
2  
3 Giuseppe Grosso, Department of Biomedical and Biotechnological Sciences, University of  
4 Catania, Italy; Idris Guessous, Geneva University Hospitals; Martin Gulliford, King's College  
5 London; Ingibjorg Gunnarsdottir and Inga Thorsdottir, University of Iceland; Holmfridur  
6 Thorgeirsdottir, Directorate of Health, Iceland; Wilbur Hadden; Aida Hadziomeragic, Institute of  
7 Public Health of Federation of Bosnia and Herzegovina; Christian Haerpfer; Jemal Haidar Ali,  
8 Addis Ababa University; Rubina Hakeem, Ziauddin University Karachi; Aminul Haque,  
9 University of Dhaka; Maryam Hashemian, Tehran University of Medical Sciences and Uta  
10 University; Rajkumar Hemalatha, Avula Laxmaiah, Indrapal Meshram, Harikumar Rachakulla,  
11 and Nimmathota Arlappa ICMR-National Institute of Nutrition, Hyderabad; Sigrun Henjum,  
12 Oslo and Akerhus University College; Hristo Hinkov, National Center of Public Health and  
13 Analyses (NCPHA); Zaiton Hjdaud; Daniel Hoffman, Rutgers University; Beth Hopping;  
14 Anahita Houshiar-rad, National Nutrition & Food Technology Research Ins; Yao-Te Hsieh,  
15 Institute of Biomedical Sciences, Academia Sinica, Taipei, Taiwan; Shu-Yi Hung; Inge  
16 Huybrechts, International Agency for Research on Cancer; Nahla Chawkat Hwalla, American  
17 University of Beirut; Nayu Ikeda; Manami Inoue; Olof Jonsdottir; Hamid Jan Bin Jan Mohamed,  
18 Universiti Sains Malaysia; Chandrashekar Janakiram, Amrita School of Dentistry; Ranil  
19 Jayawardena, University of Colombo; Rajesh Jeewon, University of Mauritius; Nattinee Jitnarin;  
20 Lars Johansson; Ola Kally; Mirnalini Kandiah; Tilakavati Karupaiah, National University of  
21 Malaysia; Lital Keinan-Boker, Rebecca Goldsmith, and Tal Shimony, Israel Center for Disease  
22 Control; Roya Kelishadi, Research Institute for Primordial Prevention of NCD, Isfahan  
23 University of Medical Sciences; Anuradha Khadilkar, Hirabai Cowasji Jehangir Medical  
24 Research Institute; Cho-il Kim, Korea Health Industry Development Institute; Eda Koksall, Gazi  
25 University; Jurgen Konig, University of Vienna, Department of Nutritional Sciences; Liisa  
26 Korkalo, Riitta Freese, and Maijaliisa Erkkola, University of Helsinki; Eva Roos, University of  
27 Helsinki, Department of Food and Nutrition; Jeremy Koster, University of Cincinnati; Irina  
28 Kovalskys, ICCAS (Instituto para la cooperacion científica en ambiente y salud), Argentina;  
29 Anand Krishnan, All India Institute of Medical Sciences; Herculina Kruger, North-West  
30 University, Potchefstroom South Africa; Rebecca Kuriyan-Raj, St John's Research Institute;  
31 Kyungwon Oh, Sanghui Kweon and Sihyun Park, Korea Disease Control and Prevention Agency  
32 (KDCA); Yuen Lai; Pulani Lanerolle, University of Colombo, Sri Lanka; Indu Waidyatilaka,  
33 University of Colombo, Sri Lanka; Catherine Leclercq; Meei-Shyuan Lee; Hae-Jeung Lee, Eulji  
34 University; J Lennert Veerman, The University of Queensland; Lydia Lera Marques, Unidada de  
35 Nutricion Publica-Professor Asociado; Yanping Li, Harvard School of Public Health; Jaana  
36 Lindström; Annie Ling; Nur Indrawaty Lipoeto, Andalas University; Patricio Lopez-Jaramillo,  
37 FOSCAL and UDES; Amy Luke, Loyola University Chicago; Widjaja Lukito; Nuno Lunet,  
38 Faculty of Medicine, University of Porto, Portugal; Carla Lopes and Milton Severo, Faculty of  
39 Medicine/ Institute of Public Health, University of Porto, Portugal; Duarte Torres, Faculty of  
40 Nutrition and Food Sciences / Institute of Public Health, University of Porto, Portugal; Elisabette  
41 Lupotto, Aida Turrini, Stefania Sette, and Raffaella Piccinelli, CREA-Alimenti e Nutrizione;  
42 Guansheng Ma; Yi Ma; Zaleha Abdullah Mahdy, National University of Malaysia (UKM); Reza  
43 Malekzadeh, Digestive Disease Research Institute, Tehran University of Medical Sciences; Wan  
44 Manan, Universiti Sains Malaysia; Dirce Marchioni, University of Sao Paulo; Pedro Marques-  
45 Vidal, Lausanne University Hospital (CHUV) and University of Lausanne, Switzerland; Yves  
46 Martin-Prevel, Institut de Recherche pour le Developpement; Hajah Masni Ibrahim; Angie  
47 Mathee; Yasuhiro Matsumura, Bunkyo University, Faculty of Health and Nutrition; Paramita  
48 Mazumdar, Centre For Media Studies; Abila M. Sibai, Faculty of Health Sciences - American  
49  
50  
51  
52  
53  
54  
55  
56  
57  
58  
59  
60

1  
2  
3 University of Beirut; Anjum Memon, Brighton and Sussex Medical School, UK; Gert Mensink,  
4 Robert Koch Institute; Alexa Meyer, University of Vienna, Austria; Parvin Mirmiran, Research  
5 Institute for Endocrine Sciences, Shahid Beheshti University of Medical Sciences; Masoud  
6 Mirzaei, Yazd Cardiovascular Research Centre, Shahid Sadoughi University of Medical  
7 Sciences; Puneet Misra, All India Institute of Medical Sciences; Anoop Misra, Fortis CDOC  
8 Center for Excellence for Diabetes; Claudette Mitchell and David Balfour, University of the  
9 Southern Caribbean; Noushin Mohammadifard, Nizal Sarrafzadegan, Moses Mwangi, and  
10 Maryam Maghroun, Isfahan Cardiovascular Research Center, Cardiovascular Research Institute,  
11 Isfahan University of Medical Sciences; Fatemeh Mohammadi-Nasrabadi, National Nutrition  
12 and Food technology Research Institute; Zalilah Mohd Shariff, Universiti Putra Malaysia; Foong  
13 Ming Moy, University of Malaya; Abdulrahman Musaiger, Arab Center for Nutrition; Elizabeth  
14 Mwaniki, The Technical University of Kenya; Jannicke Myhre; Balakrishna Nagalla, National  
15 Institute of Nutrition, Hyderabad; Androniki Naska; Augustin Nawidimbamba Zeba, Institut de  
16 Recherche en sciences de la Sante; Shu Wen Ng, University of North Carolina at Chapel Hill; Le  
17 Tran Ngoan, Hanoi Medical University; Sina Noshad, Tehran University of Medical Sciences;  
18 Angelica Ochoa, Universidad de Cuenca; Marga Ocke, Dutch National Institute for Public  
19 Health and the Environment: RIVM; Jillian Odenkirk; Mariana Oleas, Universidad Tecnica del  
20 Norte; Sonia Olivares, Institute of Nutrition and Food Technology (INTA), University of Chile;  
21 Philippos Orfanos; Johana Ortiz-Ulloa, Cuenca University; Johanna Otero, Fundacion  
22 Oftalmologica de Santander (FOSCAL); Marja-Leena Ovaskainen; Mohammadreza Pakseresht,  
23 University of Alberta; Cristina Palacios, Florida International University; Pam Palmer; Wen-  
24 Harn Pan, Institutes of Biomedical Sciences, Academia Sinica; Demosthenes Panagiotakos,  
25 Harokopio University; Rajendra Parajuli, Tribhuvan University; Gulden Pekcan; Stefka Petrova,  
26 National Centre of Public Health and Analyses; Noppawan Piaseu, Mahidol University; Christos  
27 Pitsavos; Kalpagam Polasa, National Institute of Nutrition; Luz Posada, Universidad de  
28 Antioquia; Farhad Pourfarzi, Ardabil University of Medical Sciences; Alan Martin Preston, Univ  
29 Puerto Rico-Med Sci Dept Biochemistry; Ingrid Rached, Centro de Atencion Nutricional  
30 Antimano (CANIA); Ali Reza Rahbar; Colin Rehm; Almut Richter, Robert Koch Institute;  
31 Leanne Riley; Benoit Salanave; Norie Sawada and Shoichiro Tsugane, National Cancer Center  
32 Institute for Cancer Control, Japan; Makiko Sekiyama, Graduate Program in Sustainability  
33 Science Global Leadership Initiative (GPSS–GLI), The University of Tokyo; Rusidah Selamat;  
34 Khadijah Shamsuddin, Universiti Kebangsaan Malaysia Medical Centre; Sangita Sharma,  
35 University of Alberta; Harri Sinkko; Isabelle Sioen; Ivan Sisa, Universidad San Francisco de  
36 Quito; Sheila Skeaff, University of Otago; Laufey Steingrimsdottir; Tor Strand, University of  
37 Bergen; Milton Fabian Suarez-Ortegon, University of Edinburgh; Sumathi Swaminathan, St  
38 John’s Research Institute; Gillian Swan; Elzbieta Sygnowska; Maria Szabo; Lucjan Szponar,  
39 National Food and Nutrition Institute; Ilse Khouw and Swee Ai Ng, FrieslandCampina, The  
40 Netherlands; Heli Tapanainen, The National Institute for Health and Welfare (THL); Reema  
41 Tayyem, Qatar University and University of Jordan; Bemnet Tedla; Alison Tedstone; Robert  
42 Templeton; Celine Termote, Bioversity International; Anastasia Thanopoulou, Diabetes Center,  
43 2nd Department of Internal Medicine, Athens University, Greece; Dimitrios Trichopoulos;  
44 Antonia Trichopoulou, Hellenic Health Foundation and University of Athens; Coline van  
45 Oosterhout; Erkki Vartiainen; Suvi Virtanen, National Institute for Health and Welfare; Peter  
46 Vollenweider; Marieke Vossenaar, CeSIAM in Guatemala; Eva Warensjo Lemming, Risk and  
47 Benefit Assessment Department, Swedish Food Agency; Anna Waskiewicz, Department of CVD  
48 Epidemiology, Prevention and Health Promotion, Institute of Cardiology, Warsaw, Poland;  
49  
50  
51  
52  
53  
54  
55  
56  
57  
58  
59  
60



1  
2  
3 Lothar Wieler, Robert Koch Institute; Suh Wu; Roseyati Yaakub; Mabel Yap; Safiah Yusof;  
4 Sahar Zaghoul, National Nutrition Institute, Egypt; Gábor Zajkás; Maria Elisa Zapata, CESNI;  
5 Khairul Zarina; Fatemeh Vida Zohoori, Teesside University; Mark Manary, Washington  
6 University in St. Louis; Zipporah Bukania and Yeri Kombe, Kenya Medical Research Institute;  
7 Sirje Vaask, Tallinn University; Julie Long, K. Michael Hambidge, Tshilenge S. Diba,  
8 Shivanand C. Mastiholi, Umber S. Khan, and Gabriela Tejada, University of Colorado Anschutz  
9 Medical Campus; Eha Nurk, Estonian National Institute for Health Development; Keiu Nelis;  
10 Ute Nöthlings and Ute Alexy, University of Bonn, Department of Nutrition and Food Sciences;  
11 Cornelia Tudorie and Anca Nicolau, University Dunarea de Jos, Galati, Romania; Amanda de  
12 Moura Souza, Institute of Studies in Public Health, Federal University of Rio de Janeiro (UFRJ);  
13 Alan de Brauw, Mourad Moursi, International Food Policy Research Institute (IFPRI); Alicia  
14 Roviroso, Centro de Estudios sobre Nutrición Infantil; Carol Henry, Getahun Ersino, and Gordon  
15 Zello, University of Saskatchewan, Saskatoon, Canada; Chanthaly Luangphaxay, Daovieng  
16 Douangvichit, and Latsamy Siengsounthone, Lao Tropical and Public Health Institute; Christine  
17 Hotz; Constance Rybak, Leibniz Centre for Agricultural Landscape Research; Corina Aurelia  
18 Zugravu, University of Medicine and Pharmacy Carol Davila Bucharest Romania; Donka  
19 Baykova, Medical Center Markovs; Elizabeth Yakes-Jimenez, The University of New Mexico;  
20 Gudrun B. Keding, University of Goettingen, Germany; Lydiah M. Waswa, Egerton University,  
21 Kenya; Irmgard Jordan, Justus Liebig University Giessen; J.V. Meenakshi, Delhi School of  
22 Economics, University of Delhi; Josie Desnacido and Imelda Angeles Agdeppa, Food and  
23 Nutrition Research Institute (DOST-FNRI); Justin Chileshe and Sydney Mwanza, Tropical  
24 Diseases Research Centre; Kalyana Sundram, Malaysian Palm Oil Council (MPOC); Laila  
25 Eleraky and Wolfgang Stuetz, University of Hohenheim; Lalka Rangelova, National Centre of  
26 Public Health and Analyses; Lilian Aluso, Julia Boedecker, and Francis Oduor, Consultative  
27 Group on International Agricultural Research (CGIAR); Lluís Serra-Majem, University of Las  
28 Palmas de Gran Canaria (ULPGC), Canary Islands, Spain; Tamene Taye Asayehu, College of  
29 Applied Sciences, Department of Food Science and Applied Nutrition, Addis Ababa Science and  
30 Technology University; Veronika Janská, Public Health Authority of the Slovak Republic; Ward  
31 Siamusantu, National Food and Nutrition Commission; Ken Brown, University of California,  
32 Davis.  
33  
34  
35  
36  
37  
38  
39  
40  
41  
42  
43  
44  
45  
46  
47  
48  
49  
50  
51  
52  
53  
54  
55  
56  
57  
58  
59  
60

## CHEERS 2022 Checklist

| Topic           | No. | Item                                                                                       | Location where item is reported                                                                         |
|-----------------|-----|--------------------------------------------------------------------------------------------|---------------------------------------------------------------------------------------------------------|
| <b>Title</b>    |     |                                                                                            |                                                                                                         |
|                 | 1   | Identify the study as an economic evaluation and specify the interventions being compared. | Examining the influence of price and income on global saturated fat intake: evidence from 160 countries |
| <b>Abstract</b> |     |                                                                                            |                                                                                                         |

| Topic               | No. Item                                                                                                | Location where item is reported                                                                                                                                                                                                                                                                                                                                                                                                                                                                                                                                                                                                                                                                                                                                                                                                                                                                                                                                                                                                                                                                                                                                                                                                                                                                                                                                                                                                                                                                                                                                                                                                                                                                                                                                                                  |
|---------------------|---------------------------------------------------------------------------------------------------------|--------------------------------------------------------------------------------------------------------------------------------------------------------------------------------------------------------------------------------------------------------------------------------------------------------------------------------------------------------------------------------------------------------------------------------------------------------------------------------------------------------------------------------------------------------------------------------------------------------------------------------------------------------------------------------------------------------------------------------------------------------------------------------------------------------------------------------------------------------------------------------------------------------------------------------------------------------------------------------------------------------------------------------------------------------------------------------------------------------------------------------------------------------------------------------------------------------------------------------------------------------------------------------------------------------------------------------------------------------------------------------------------------------------------------------------------------------------------------------------------------------------------------------------------------------------------------------------------------------------------------------------------------------------------------------------------------------------------------------------------------------------------------------------------------|
|                     | 2 Provide a structured summary that highlights context, key methods, results, and alternative analyses. | <p>Introduction When considering proposals to improve diets, it is important to understand how factors like price and income can affect saturated fat intake and demand. This is even more important when considering economic interventions on a global scale. In this study, we examine and estimate the influence of price and income on intake across 160 countries, by age and sex, and derive sensitivity measures (elasticities) that vary by age, sex, and geographic region. Methods Secondary data were used for this analysis. Intake data by age, sex, and country were obtained from the 2018 Global Dietary Database. These data were then linked to global price data for select food groups from the World Bank International Comparison Program and income data from the World Development Indicators Databank (World Bank). We estimated intake responsiveness to income and prices, accounting for differences by world region, age, and sex. Results Intake differences due to price were highly significant, with a one percent increase in price associated with lower SF intake (% energy/d) of about 4.3 percentage points. Results indicated that the highest price sensitivity was due to meat consumption. We also find significant differences across regions. In high-income countries, median (age 40) intake reductions were e 1.4, 0.8, and 0.2 percentage points, given a one-percent increase in the price of meat, dairy, and oils and fats, respectively. Intake differences due to income were insignificant. Conclusion The results of this study show heterogeneous associations among prices and intake within and across countries. Policymakers should consider these heterogenous effects as they address global nutrition and health challenges.</p> |
| <b>Introduction</b> |                                                                                                         |                                                                                                                                                                                                                                                                                                                                                                                                                                                                                                                                                                                                                                                                                                                                                                                                                                                                                                                                                                                                                                                                                                                                                                                                                                                                                                                                                                                                                                                                                                                                                                                                                                                                                                                                                                                                  |



| Topic                                | No. | Item                                                                                                                            | Location where item is reported                                                                                                                                                                                                                                                                                                                                                                                                                                                                                                                                                                                                                                                                                                                                                                                                                    |
|--------------------------------------|-----|---------------------------------------------------------------------------------------------------------------------------------|----------------------------------------------------------------------------------------------------------------------------------------------------------------------------------------------------------------------------------------------------------------------------------------------------------------------------------------------------------------------------------------------------------------------------------------------------------------------------------------------------------------------------------------------------------------------------------------------------------------------------------------------------------------------------------------------------------------------------------------------------------------------------------------------------------------------------------------------------|
| <b>Background and objectives</b>     | 3   | Give the context for the study, the study question, and its practical relevance for decision making in policy or practice.      | To help address these knowledge gaps, this investigation assessed how price and country income relate to SF intake. We used nationally representative intake estimates from the 2018 Global Dietary Database to estimate how per capita income and prices jointly relate to SF intake by age and sex globally. Since nutrients are found in food, examinations of nutrient demand must consider food source demand, with price and income as explanatory variables.(15-17) Using price and expenditure data from the World Bank International Comparison Program, we constructed a global price series based on three food categories: meat, dairy, and oils and fats. This series sufficiently explained SF intake differences across countries and allowed for assessing the relationships of per capita income and price in each food category. |
| <b>Methods</b>                       |     |                                                                                                                                 |                                                                                                                                                                                                                                                                                                                                                                                                                                                                                                                                                                                                                                                                                                                                                                                                                                                    |
| <b>Health economic analysis plan</b> | 4   | Indicate whether a health economic analysis plan was developed and where available.                                             | No. This does not apply.                                                                                                                                                                                                                                                                                                                                                                                                                                                                                                                                                                                                                                                                                                                                                                                                                           |
| <b>Study population</b>              | 5   | Describe characteristics of the study population (such as age range, demographics, socioeconomic, or clinical characteristics). | Secondary data were used for this analysis. Intake data by age, sex, and country were obtained from the 2018 Global Dietary Database. These data were then linked to global price data for select food groups from the World Bank International Comparison Program and income data from the World Development Indicators Databank (World Bank). We estimated intake responsiveness to income and prices, accounting for differences by world region, age, and sex.                                                                                                                                                                                                                                                                                                                                                                                 |
| <b>Setting and location</b>          | 6   | Provide relevant contextual information that may influence findings.                                                            | Global study - 160 countries.                                                                                                                                                                                                                                                                                                                                                                                                                                                                                                                                                                                                                                                                                                                                                                                                                      |
| <b>Comparators</b>                   | 7   | Describe the interventions or strategies being compared and why chosen.                                                         | Economic analysis using secondary data. This does not apply.                                                                                                                                                                                                                                                                                                                                                                                                                                                                                                                                                                                                                                                                                                                                                                                       |

| Topic                                                   | No. | Item                                                                                                            | Location where item is reported                                                                                                                                                                                                                                                                                                                                                                                                                                                                                                                 |
|---------------------------------------------------------|-----|-----------------------------------------------------------------------------------------------------------------|-------------------------------------------------------------------------------------------------------------------------------------------------------------------------------------------------------------------------------------------------------------------------------------------------------------------------------------------------------------------------------------------------------------------------------------------------------------------------------------------------------------------------------------------------|
| <b>Perspective</b>                                      | 8   | State the perspective(s) adopted by the study and why chosen.                                                   | <ul style="list-style-type: none"> <li>It is generally understood that affordability is an important driver of food demand, underscoring the importance of income and prices in dietary choices. Research has confirmed significant associations among income, prices, and food demand. What is missing, however, is a better understanding of how price and income influence actual nutrient intake, particularly on a global scale, and how price and income relationships could vary by demographics within and across countries.</li> </ul> |
| <b>Time horizon</b>                                     | 9   | State the time horizon for the study and why appropriate.                                                       | 2017-2018                                                                                                                                                                                                                                                                                                                                                                                                                                                                                                                                       |
| <b>Discount rate</b>                                    | 10  | Report the discount rate(s) and reason chosen.                                                                  | N/A                                                                                                                                                                                                                                                                                                                                                                                                                                                                                                                                             |
| <b>Selection of outcomes</b>                            | 11  | Describe what outcomes were used as the measure(s) of benefit(s) and harm(s).                                   | N/A                                                                                                                                                                                                                                                                                                                                                                                                                                                                                                                                             |
| <b>Measurement of outcomes</b>                          | 12  | Describe how outcomes used to capture benefit(s) and harm(s) were measured.                                     | N/A                                                                                                                                                                                                                                                                                                                                                                                                                                                                                                                                             |
| <b>Valuation of outcomes</b>                            | 13  | Describe the population and methods used to measure and value outcomes.                                         | See 5.                                                                                                                                                                                                                                                                                                                                                                                                                                                                                                                                          |
| <b>Measurement and valuation of resources and costs</b> | 14  | Describe how costs were valued.                                                                                 | Income values were in \$US.                                                                                                                                                                                                                                                                                                                                                                                                                                                                                                                     |
| <b>Currency, price date, and conversion</b>             | 15  | Report the dates of the estimated resource quantities and unit costs, plus the currency and year of conversion. | Prices were indexes where World = 100.                                                                                                                                                                                                                                                                                                                                                                                                                                                                                                          |

| Topic                                                                        | No. | Item                                                                                                                                                                          | Location where item is reported                                                                                                                                                                                                                                                                                                                                                                                                                                                                                                                                           |
|------------------------------------------------------------------------------|-----|-------------------------------------------------------------------------------------------------------------------------------------------------------------------------------|---------------------------------------------------------------------------------------------------------------------------------------------------------------------------------------------------------------------------------------------------------------------------------------------------------------------------------------------------------------------------------------------------------------------------------------------------------------------------------------------------------------------------------------------------------------------------|
| <b>Rationale and description of model</b>                                    | 16  | If modelling is used, describe in detail and why used. Report if the model is publicly available and where it can be accessed.                                                | To estimate SF intake demand, we used a semi-log functional form that has been proven to be consistent with economic theory and rational consumer behavior.(25, 26) Many studies have used a double-log form.(27) However, a problem with the double-log form is that significant intake differences across subgroups can be lost in log conversions. A semi-log relationship allowed for a better assessment of subgroup effects on intake responsiveness.                                                                                                               |
| <b>Analytics and assumptions</b>                                             | 17  | Describe any methods for analysing or statistically transforming data, any extrapolation methods, and approaches for validating any model used.                               | Econometric analysis assuming country clusters.                                                                                                                                                                                                                                                                                                                                                                                                                                                                                                                           |
| <b>Characterising heterogeneity</b>                                          | 18  | Describe any methods used for estimating how the results of the study vary for subgroups.                                                                                     | Econometric analysis assuming country clusters.                                                                                                                                                                                                                                                                                                                                                                                                                                                                                                                           |
| <b>Characterising distributional effects</b>                                 | 19  | Describe how impacts are distributed across different individuals or adjustments made to reflect priority populations.                                                        | Intake differences due to price were highly significant, with a one percent increase in price associated with lower SF intake (% energy/d) of about 4.3 percentage points. Results indicated that the highest price sensitivity was due to meat consumption. We also find significant differences across regions. In high-income countries, median (age 40) intake reductions were e 1.4, 0.8, and 0.2 percentage points, given a one-percent increase in the price of meat, dairy, and oils and fats, respectively. Intake differences due to income were insignificant. |
| <b>Characterising uncertainty</b>                                            | 20  | Describe methods to characterise any sources of uncertainty in the analysis.                                                                                                  | Not applicable                                                                                                                                                                                                                                                                                                                                                                                                                                                                                                                                                            |
| <b>Approach to engagement with patients and others affected by the study</b> | 21  | Describe any approaches to engage patients or service recipients, the general public, communities, or stakeholders (such as clinicians or payers) in the design of the study. | N/A                                                                                                                                                                                                                                                                                                                                                                                                                                                                                                                                                                       |
| <b>Results</b>                                                               |     |                                                                                                                                                                               |                                                                                                                                                                                                                                                                                                                                                                                                                                                                                                                                                                           |

| Topic                                                                       | No. | Item                                                                                                                                                                     | Location where item is reported |
|-----------------------------------------------------------------------------|-----|--------------------------------------------------------------------------------------------------------------------------------------------------------------------------|---------------------------------|
| <b>Study parameters</b>                                                     | 22  | Report all analytic inputs (such as values, ranges, references) including uncertainty or distributional assumptions.                                                     | See Results                     |
| <b>Summary of main results</b>                                              | 23  | Report the mean values for the main categories of costs and outcomes of interest and summarise them in the most appropriate overall measure.                             | See Results                     |
| <b>Effect of uncertainty</b>                                                | 24  | Describe how uncertainty about analytic judgments, inputs, or projections affect findings. Report the effect of choice of discount rate and time horizon, if applicable. | N/A                             |
| <b>Effect of engagement with patients and others affected by the study</b>  | 25  | Report on any difference patient/service recipient, general public, community, or stakeholder involvement made to the approach or findings of the study                  | N/A                             |
| <b>Discussion</b>                                                           |     |                                                                                                                                                                          |                                 |
| <b>Study findings, limitations, generalisability, and current knowledge</b> | 26  | Report key findings, limitations, ethical or equity considerations not captured, and how these could affect patients, policy, or practice.                               | Discussion                      |
| <b>Other relevant information</b>                                           |     |                                                                                                                                                                          |                                 |
| <b>Source of funding</b>                                                    | 27  | Describe how the study was funded and any role of the funder in the identification, design, conduct, and reporting of the analysis                                       | End of manuscript               |
| <b>Conflicts of interest</b>                                                | 28  | Report authors conflicts of interest according to journal or International Committee of Medical Journal Editors requirements.                                            | End of manuscript               |

1  
2  
3 *From:* Husereau D, Drummond M, Augustovski F, et al. Consolidated Health Economic  
4 Evaluation Reporting Standards 2022 (CHEERS 2022) Explanation and Elaboration: A  
5 Report of the ISPOR CHEERS II Good Practices Task Force. Value Health 2022;25.  
6 [doi:10.1016/j.jval.2021.10.008](https://doi.org/10.1016/j.jval.2021.10.008)  
7  
8  
9  
10  
11  
12  
13  
14  
15  
16  
17  
18  
19  
20  
21  
22  
23  
24  
25  
26  
27  
28  
29  
30  
31  
32  
33  
34  
35  
36  
37  
38  
39  
40  
41  
42  
43  
44  
45  
46  
47  
48  
49  
50  
51  
52  
53  
54  
55  
56  
57  
58  
59  
60

For peer review only

# BMJ Open

## How prices and income influence global patterns in saturated fat intake by age, sex, and world region: a cross-sectional analysis of 160 countries

|                                 |                                                                                                                                                                                                                                                                                                                                                                                                                                                                                                                                                                                                                                                                                                                                                                                                                                                   |
|---------------------------------|---------------------------------------------------------------------------------------------------------------------------------------------------------------------------------------------------------------------------------------------------------------------------------------------------------------------------------------------------------------------------------------------------------------------------------------------------------------------------------------------------------------------------------------------------------------------------------------------------------------------------------------------------------------------------------------------------------------------------------------------------------------------------------------------------------------------------------------------------|
| Journal:                        | <i>BMJ Open</i>                                                                                                                                                                                                                                                                                                                                                                                                                                                                                                                                                                                                                                                                                                                                                                                                                                   |
| Manuscript ID                   | bmjopen-2023-074562.R2                                                                                                                                                                                                                                                                                                                                                                                                                                                                                                                                                                                                                                                                                                                                                                                                                            |
| Article Type:                   | Original research                                                                                                                                                                                                                                                                                                                                                                                                                                                                                                                                                                                                                                                                                                                                                                                                                                 |
| Date Submitted by the Author:   | 19-Dec-2023                                                                                                                                                                                                                                                                                                                                                                                                                                                                                                                                                                                                                                                                                                                                                                                                                                       |
| Complete List of Authors:       | Ahles, Amelia; Texas A&M University System<br>MUHAMMAD, ANDREW; The University of Tennessee Knoxville Institute of Agriculture,<br>Yenerall, Jacqueline; The University of Tennessee Knoxville Institute of Agriculture<br>Reedy, Julia; Tufts University Friedman School of Nutrition Science and Policy<br>Shi, Peilin; Friedman School of Nutrition Science and Policy, Tufts University,<br>Zhang, Jianyi; Tufts University Friedman School of Nutrition Science and Policy<br>Cudhea, Frederick; Tufts University Friedman School of Nutrition Science and Policy,<br>Erndt-Marino, Josh; Tufts University Friedman School of Nutrition Science and Policy<br>Miller, Victoria ; Tufts University Friedman School of Nutrition Science and Policy,<br>Mozaffarian, Dariush; Tufts University Friedman School of Nutrition Science and Policy |
| <b>Primary Subject Heading</b>: | Health economics                                                                                                                                                                                                                                                                                                                                                                                                                                                                                                                                                                                                                                                                                                                                                                                                                                  |
| Secondary Subject Heading:      | Health economics, Global health                                                                                                                                                                                                                                                                                                                                                                                                                                                                                                                                                                                                                                                                                                                                                                                                                   |
| Keywords:                       | HEALTH ECONOMICS, Decision Making, Obesity                                                                                                                                                                                                                                                                                                                                                                                                                                                                                                                                                                                                                                                                                                                                                                                                        |
|                                 |                                                                                                                                                                                                                                                                                                                                                                                                                                                                                                                                                                                                                                                                                                                                                                                                                                                   |

SCHOLARONE™  
Manuscripts

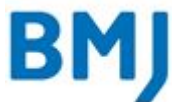

I, the Submitting Author has the right to grant and does grant on behalf of all authors of the Work (as defined in the below author licence), an exclusive licence and/or a non-exclusive licence for contributions from authors who are: i) UK Crown employees; ii) where BMJ has agreed a CC-BY licence shall apply, and/or iii) in accordance with the terms applicable for US Federal Government officers or employees acting as part of their official duties; on a worldwide, perpetual, irrevocable, royalty-free basis to BMJ Publishing Group Ltd ("BMJ") its licensees and where the relevant Journal is co-owned by BMJ to the co-owners of the Journal, to publish the Work in this journal and any other BMJ products and to exploit all rights, as set out in our [licence](#).

The Submitting Author accepts and understands that any supply made under these terms is made by BMJ to the Submitting Author unless you are acting as an employee on behalf of your employer or a postgraduate student of an affiliated institution which is paying any applicable article publishing charge ("APC") for Open Access articles. Where the Submitting Author wishes to make the Work available on an Open Access basis (and intends to pay the relevant APC), the terms of reuse of such Open Access shall be governed by a Creative Commons licence – details of these licences and which [Creative Commons](#) licence will apply to this Work are set out in our licence referred to above.

Other than as permitted in any relevant BMJ Author's Self Archiving Policies, I confirm this Work has not been accepted for publication elsewhere, is not being considered for publication elsewhere and does not duplicate material already published. I confirm all authors consent to publication of this Work and authorise the granting of this licence.

# How prices and income influence global patterns in saturated fat intake by age, sex, and world region: a cross-sectional analysis of 160 countries

## Abstract

### Objective

When considering proposals to improve diets, it is important to understand how factors like price and income can affect saturated fat intake and demand. In this study, we examine and estimate the influence of price and income on intake across 160 countries, by age and sex, and derive sensitivity measures (price elasticities) that vary by age, sex, and world region.

### Design

We econometrically estimate intake responsiveness to income and prices across countries, accounting for differences by world region, age, and sex. Intake data by age, sex, and country were obtained from the 2018 Global Dietary Database. These data were then linked to global price data for select food groups from the World Bank International Comparison Program and income data from the World Development Indicators Databank (World Bank).

### Results

Intake differences due to price were highly significant, with a one percent increase in price associated with lower SF intake (% energy/d) of about 4.3 percentage points. We also find significant differences across regions. In high-income countries, median (age 40) intake reductions were 1.4, 0.8, and 0.2 percentage points, given a one-percent increase in the price of meat, dairy, and oils and fats, respectively. Price elasticities varied with age but not sex. Intake differences due to income were insignificant when regional binary variables were included in the analysis.

### Conclusion

The results of this study show heterogeneous associations among prices and intake within and across countries. Policymakers should consider these heterogenous effects as they address global nutrition and health challenges.



### Strengths and Limitations of this Study

- We compared price responsiveness across population subgroups (by age and sex) and across countries by world region.
- The analysis allowed for price elasticity comparison across primary contributing food categories that included the price of meat, dairy, and oils/fats.
- Price and income measures were at the country level and could not account for within-country price and income differences.
- The price series used in this study was limited to the primary contributing food categories and did not include, for instance, ultra processed foods.

For peer review only

## INTRODUCTION

While nutritional guidelines call for reductions in saturated fat (SF), the literature is not clear and remains controversial on the causal link between SF intake and cardiovascular disease risk and other health-related outcomes.(1-3) Studies note that different food sources of SF may have different relationships with risk, for example with higher risk for red meats and their fats, generally neutral relationships for dairy foods and their fats, and protective associations for plant oils.(4) In addition, low SF intake has been associated with higher mortality risk in studies comprising mostly low- and middle-income countries, and very low SF intake is associated with higher risk of hemorrhagic stroke, potentially due to increased cerebral vascular fragility.(3, 4)

Governments and international organizations have proposed economic interventions to improve diets and health outcomes.(5-8) Associated intake and health responses from the taxation of unhealthy foods has been the subject of many studies.(9-12) For instance, studies have considered the effectiveness of economic interventions to reduce the consumption of sugar-sweetened beverages (SSBs) and calorically dense foods across countries and cities over the past decade. However, the effectiveness of these economic interventions in reducing intake and improving health varies widely.(9, 13, 14) For instance, taxation in a particular jurisdiction could increase cross-border shopping (i.e., purchasing outside of the jurisdiction) or substitutions for unhealthy, untaxed alternatives.(9, 13)

In considering these proposals to improve diets, it is important to understand how factors like price and income influence SF intake and demand.(6, 15-17) Sensitivity to prices of SF-source foods could vary by per capita income, age, sex, educational attainment, etc. This relationship may also vary by world region, given differing cultural preferences, with important implications for health policy interventions.(18-20) However, to-date, no evidence exists on the

1  
2  
3 global income and price sensitivity of SF intake, nor potential variation by important  
4 demographic characteristics. Other than a few noted exceptions, global assessments of SF intake  
5 have been limited, particularly when considering price and income effects.(21, 22)  
6  
7  
8  
9

10 To help address these knowledge gaps, this investigation assessed how price and country  
11 income relate to SF intake. We used nationally representative intake estimates from the 2018  
12 Global Dietary Database to estimate how per capita income and prices jointly relate to SF intake  
13 by age and sex globally. Since nutrients are found in food, examinations of nutrient demand  
14 must consider food source demand, with price and income as explanatory variables.(23-25)  
15 Using price and expenditure data from the World Bank International Comparison Program, we  
16 constructed a global price series based on three food categories: meat, dairy, and oils and fats.  
17 This series sufficiently explained SF intake differences across countries and allowed for  
18 assessing the relationships of per capita income and price in each food category.  
19  
20  
21  
22  
23  
24  
25  
26  
27  
28  
29  
30  
31  
32

## 33 **METHODS**

### 34 **Data and sources**

35 We used secondary data sources for the analysis. SF intake data measured in percent of total  
36 energy per day (% energy/d) for a representative individual was obtained from the 2018 Global  
37 Dietary Database (GDD). The GDD, maintained by the Global Nutrition and Policy Consortium  
38 at Tufts Friedman School of Nutrition Science and Policy provides comprehensive and  
39 comparable dietary intakes for major foods and nutrients in 185 countries and territories. The  
40 GDD was developed using systematic searches of available survey data of individual-based  
41 dietary intakes for key food and nutrient categories at the national and subnational level. GDD  
42 intake estimates are based on the results of existing surveys (1,248 in total), representing 188  
43  
44  
45  
46  
47  
48  
49  
50  
51  
52  
53  
54  
55  
56  
57  
58  
59  
60

1  
2  
3 countries and approximately 99% of the global population. It is the first database to provide  
4  
5 estimates of daily consumption levels by food or nutrient category and contains representative  
6  
7 individual intake data by age (0-1 year, 1-2 years, 2-5 years, and then by increments of 5 years to  
8  
9 age 97.5) and sex.(26) The GDD also disaggregates individual intakes by three education levels  
10  
11 and residence (urban and rural). The GDD data estimation process included extensive  
12  
13 communication with researchers and government authorities and large subnational surveys, when  
14  
15 other options were are unavailable (27, 28). For details on the GDD coverage, data  
16  
17 methodology, and data collection, see:  
18  
19

20  
21 <https://www.globaldietarydatabase.org/methods/summary-methods-and-data-collection>.  
22  
23

24 National food expenditure and price data from the World Bank International Comparison  
25  
26 Program (ICP) were used to derive a SF price series. Although our intake measure is  
27  
28 comprehensive and inclusive of all food sources, the price series used for the analysis was  
29  
30 limited to the primary contributing food categories: meats, dairy, and oils and fats. The price  
31  
32 series for the *meats* category in the ICP database is an aggregation of the following: beef and  
33  
34 veal; pork; lamb, mutton, and goat; poultry; and other meats and meat preparations. *Dairy* –  
35  
36 fresh milk; preserved milk and other milk products; cheese and curd; and eggs and egg-based  
37  
38 products. *Oils and fats* – butter and margarine; and other edible oils and fats (29). Although  
39  
40 saturated fat is readily found in a wide array of foods, these categories have been identified as  
41  
42 major contributors to saturated fatty acids in diets.(30) While other foods, such as sweet and  
43  
44 savory snacks, also contribute and are included in our SF intake variable, global price series for  
45  
46 these food categories are not widely available.  
47  
48  
49

50  
51 The ICP is a global initiative that estimates purchasing power parities (PPPs) and price  
52  
53 level indices (PLIs) across countries, which allows for global comparisons of spending and  
54  
55  
56  
57

1  
2  
3 economic wellbeing. PPPs are spatial price deflators that make it possible to compare  
4 expenditures across economies.(31) PLIs are PPPs standardized to a common currency  
5 (generally the U.S Dollar) or indexed to a global average or base country.(32) The most recent  
6 ICP data round (2017) included comparative prices and expenditure data from 176 participating  
7 economies.(32)

8  
9  
10 For income, we used 2018 PPP-adjusted, gross domestic product (GDP) per capita from  
11 the World Development Indicators (WDI) database. Because differences in currency values and  
12 exchange rates do not always consistently reflect price-level differences across countries, PPP-  
13 adjusted GDP allowed for cross-country comparisons because overall price disparities across  
14 countries are taken into account.(33)

15  
16  
17 The analysis was limited to the 160 countries represented in all three databases (GDD,  
18 ICP, and WDI), which are listed in Supplementary Table 1 by geographic region (see the  
19 Supplemental Appendix): East Asia, Southeast Asia, and the Asian Pacific (Asia) (14 countries);  
20 Central and Eastern Europe and Central Asia (CEE) (27 countries); Latin America and  
21 Caribbean (LAC) (29 countries); Middle East and North Africa (MENA) (17 countries); South  
22 Asia (S-Asia) (7 countries); Sub-Saharan Africa (SSA) (43 countries), and High-Income/Western  
23 Countries (HIC) (24 countries). HIC is an aggregation of high-income countries in the Western  
24 hemisphere, Australia, and New Zealand, with the addition of a few surrounding islands.  
25 Countries without data in any of the three databases were excluded.

26  
27  
28 See the Supplemental Appendix for a more detailed discussion of the price, expenditure,  
29 and income data by geographic region.

## 30 31 32 33 34 35 36 37 38 39 40 41 42 43 44 45 46 47 48 49 50 51 52 53 54 **Patient and public involvement**

1  
2  
3 We used secondary data for this study. All data are publicly available and did not require direct  
4 patient involvement in the study design or implementation.  
5  
6  
7

### 8 9 10 **Model and estimation**

11  
12 To estimate SF intake demand, we used a semi-log functional form that has been proven to be  
13 consistent with economic theory and rational consumer behavior.(34, 35) Many studies have  
14 used a double-log form.(36) However, a problem with the double-log form is that significant  
15 intake differences across subgroups can be lost in log conversions. A semi-log relationship  
16 allowed for a better assessment of subgroup effects on intake responsiveness. Also, it has been  
17 shown that semi-log models contain the necessary information for obtaining, for instance,  
18 reliable measures of consumer welfare and the underlying preference structure of consumers.(34)  
19 Prior studies have also used a demand-system approach, primarily due to the adding-up property  
20 when using expenditure data (i.e., expenditures on all food categories “add up” to total food  
21 expenditures), which results in the error terms being correlated across equations specific to each  
22 food category. Since this relationship does not exist with individual intakes, particularly when  
23 the correspondence between purchases and intakes is not one to one, we can estimate intake  
24 demand for a single food or nutrient category separately.(37, 38)  
25  
26  
27  
28  
29  
30  
31  
32  
33  
34  
35  
36  
37  
38  
39  
40  
41

42 Let  $q_{gC}$  represent the % energy/d from saturated fat for demographic subgroup  $g$  ( $g$ : sex  
43 and age) in country  $C$  and let  $p_C$  represent the price level index for the contributing food  
44 categories in country  $C$ . Let  $Y_C$  and  $P_C$  represent real per capita income and the food price level  
45 index, respectively, in country  $C$ . Given these terms, the following model was used to estimate  
46 the relationship between intake, income, and prices:  
47  
48  
49  
50  
51  
52  
53  
54  
55  
56  
57  
58  
59  
60

$$q_{gC} = \beta_0^* + \beta_1^* \ln(Y_C) + \beta_2^* \ln\left(\frac{p_C}{P_C}\right) + u_{gC}. \quad (1)$$

The  $\beta_k^*$  terms [ $k = \{0,1,2\}$ ] are parameters to be estimated and  $u_{gC}$  is a random error term. Note that the price term is defined by the price of contributing food categories ( $p_C$ ) relative to overall food prices ( $P_C$ ). Thus, the model discounts any price differences across countries due to differences in overall food prices and implicitly accounts for the cross-price effects of other foods. For instance, if dairy prices were the same in two countries, but overall food prices differed, intake would be greater in the country with the higher food-price level since dairy is *relatively* cheaper when compared to food overall. Note that equation (1) does not include higher order income and price effects (e.g., quadratic income and price-income interactions). In preliminary analysis, these higher-order terms were highly insignificant, which implied that price or income responsiveness did not depend on the level of per-capita income level.

Using equation (1), we estimated intake demand using a procedure that allowed for error correlations among observations from the same country (i.e., country-clustered errors).<sup>(39)</sup> To account for differences in preferences across countries due to cultural differences or other related factors, we included regional binary variables in the analysis (ASIA, CEE, LAC, MENA, S-ASIA, and SSA). We accounted for age and sex by allowing these factors to have a direct effect on intake, as well as an additional effect through income and prices. Thus, the beta terms ( $\beta_k^*$ ) were expanded to account for age and sex interactions:  $\beta_k^* = f(\text{sex}, \text{age}) \forall k$ . Further disaggregations (education level and residence) were not considered due to estimation concerns resulting from negligible differences in SF intake across these factors. Although we used a single price index ( $p_C$ ) to represent the three food categories (meats, dairy, and oils and fats),

intake responsiveness with respect to the price of each food category were easily derived.

Defining the conditional expenditure share and price for the  $i$ th food category in country  $C$  as  $s_{iC}$

and  $p_{iC}$ , respectively,  $p_C$  is as follows:  $p_C = \sum_i s_{iC} p_{iC}$ . Thus, relationships between  $q_{gC}$  and  $p_{iC}$

were derived using the estimate on the price term in equation (1) ( $\beta_2^*$ ) and the conditional

expenditure share  $s_{iC}$  as follows:  $\frac{\partial q_{gC}}{\partial p_{iC}} = \frac{\partial q_{gC} \partial p_C}{\partial p_C \partial p_{iC}} = \frac{\beta_2^*}{p_C} s_{iC}$ .

## RESULTS

### Descriptive statistics and SF intake overview

Table 1 shows the descriptive statistics for the variables used in the model. Mean SF intake across all observations was 10.3% energy/d and ranged from 2.39 to 27.28. PPP-adjust real GDP per capita ranged from \$780 to \$117,245 (mean = \$22,226). The deflated price index ( $\frac{p_C}{P_C}$ ) ranged from 0.71 to 1.40 (mean = 1.00). Mean values for the region and sex variables reflect the country and subgroup representation in the data.(26, 33)

Figure 1 contains violin plots for SF intake by sex, age, and region based on all observations ( $n = 7,040$ ). Violin plots use kernel densities to visualize the distribution of intake. The width of the violin plot corresponded to the probability of an observation taking a specific value of SF intake and the vertical black line in each violin plot corresponds to the median value. In general, the violin plots showed that the distribution of SF is similar across age and sex subgroups, although there was greater variation across regions. Additionally, the presence of long right tails across most subgroups suggested the presence of outliers with very high values of SF intake.(26)



1  
2  
3 While the median value for SF intake was around 10.60 % energy/d, there were notable  
4 differences (Figure 1). Median SF intake was slightly higher in females (females = 10.88,  
5 males=10.40). Across regions, median SF intake was lowest in S-Asia (6.42) and highest in HIC  
6 (13.78). Overall, the maximum value for saturated fat intake occurred in the Philippines (27.48)  
7 amongst female infants (< 1 year old), while the overall minimum occurred in Nepal (2.39)  
8 amongst females between the ages of 20 and 25. Even within regions, notable differences  
9 occurred. In HIC, for instance, intake ranged from a high of 23.02 % energy/d in France  
10 amongst female infants to 9.45 % energy/d in Portugal amongst males, age 95 years and  
11 older.(26)  
12  
13  
14  
15  
16  
17  
18  
19  
20  
21  
22  
23  
24  
25

### 26 **Estimation results**

27  
28 We first estimated the model using intake values at the country level (i.e., intake averaged over  
29 all demographic subgroups) ( $n = 160$ ) (See Supplemental Table 2). Since our explanatory  
30 variables (price and income) were country specific and did not vary with demographic  
31 subgroups, it was useful to examine the significance of price or income without age and sex  
32 differences. The country-level analysis also revealed the importance of each variable in  
33 explaining global differences in SF intake. For instance, Model 1 showed that regional  
34 differences accounted for a large share of intake differences across countries (Adjusted  $R^2 =$   
35 0.39). When regional differences were not accounted for, both income (1.03,  $p < 0.01$ ) (Model  
36 2) and price (-3.90,  $p < 0.05$ ) (Model 3) were significant. When regional differences were  
37 accounted for (Model 4), price was still significant (-4.33,  $p < 0.05$ ), but income was  
38 insignificant. The negative price estimate was consistent with economic theory (higher prices  
39  
40  
41  
42  
43  
44  
45  
46  
47  
48  
49  
50  
51  
52  
53  
54  
55  
56  
57  
58  
59  
60

1  
2  
3 being associated with lower intake) and indicated that a unit increase in the log of price was  
4  
5 associated with lower SF intake by 4.33 percentage points.  
6

7  
8 Since the intake variable was measured as a percent, it is important to clarify the  
9  
10 difference between a percentage point change and percent change. For instance, intake falling  
11  
12 from 10.83 to 6.50 % energy/d, is a 4.33 percentage point decline, but a 40% decline:  $-4.33 \div$   
13  
14 10.83). This distinction is important when considering elasticity relationships where both intake  
15  
16 and prices are measured in percentage. Assuming mean intake (10.83 % energy/day) as the base,  
17  
18 intake falling by 4.33 percentage points or 40% given a unit change in the log of price (a two-  
19  
20 fold increase) suggested a price elasticity of about -0.40. That is, SF intake declines by 0.40%  
21  
22 for every 1.0% increase in price, which indicates minimal price sensitivity and inelastic demand.  
23  
24 Note that this result is based on a price increase across all food categories in the price series. As  
25  
26 discussed later in this section, intake responsiveness to the price of a particular food category  
27  
28 (e.g., dairy) was smaller.  
29  
30  
31

32  
33 Estimation results for the full model (Model 4) are reported in Table 2. Other than ASIA,  
34  
35 SF intake was significantly lower in all regions relative to HIC intake. Intake also decreased  
36  
37 with higher age ( $-0.10, p < 0.01$ ), but this effect was less significant with older adults. Results  
38  
39 (Model 4) indicated a price effect of  $-7.16 (p < 0.01)$ , where the magnitude became smaller with  
40  
41 age ( $0.20, p < 0.01$ ), but then increased for older populations. There was no significant  
42  
43 difference in the price effect by sex – and like the country-level analysis – the income effect on  
44  
45 intake was insignificant when regional differences were considered. Consequently, we did not  
46  
47 examine income effects in detail and the price-specific measures that follow are not specific to  
48  
49 sex.  
50  
51  
52  
53  
54  
55  
56  
57  
58  
59  
60

### **Intake responsiveness and food prices**

Using the country-level estimates from Supplemental Table 2, we derived measures of aggregate intake change with respect to price changes specific to the food categories in the SF price series (meat, dairy, and oils and fats) (Figure 2). Note that our dependent variable is SF intake from all foods, including ultra-processed food. Thus, the price effects reported in this section measure how changes in the price of meat (e.g.) affect total SF intake, not just SF intake from meat. An increase in the meat price index resulted in the largest intake decrease: -2.47 percentage points from a two-fold increase in price (IQR: -2.29 to -2.78). Assuming mean intake as the base, this implied a price elasticity of about -0.23 (i.e., a 0.23% decline for every 1.0% increase in meat prices). The next highest intake decrease was in response to the dairy price index (-1.30 percentage points and IQR: -1.01 to -1.56), implying a price elasticity of -0.12. The results for oils and fats indicate the lowest intake response to a price change (-0.55 percentage point change and IQR: -0.29 to -0.65); the elasticity with respect to the price of oils and fats is about -0.06.

Using the estimates from Table 2, we assessed intake responsive by food category, age, and region (See Figure 3). Across regions, meat prices resulted in the largest variation in SF intake, with S-Asia being the only exception. In HIC, for instance, median SF intake reductions at age 40 were 1.37, 0.78, and 0.15 percentage points, for 1% higher prices of meat, dairy, and oils and fats, respectively. In contrast, intake reductions in S-Asia at age 40 were highest for dairy prices (1.14 percentage points) followed by meat prices (0.62 percentage points) and then the price of oils and fats (0.48 percentage points). However, the IQR overlap for meat and dairy in S-Asia suggested that intake responsiveness to these two prices was not significantly different.

Across regions, there were key differences in intake responsiveness with respect to price changes. In HIC, there was no IQR overlap, suggesting significantly higher intake

1  
2  
3 responsiveness to meat prices when compared to dairy prices, and dairy prices compared to the  
4 price of oils and fats. Similar patterns were observed for CEE, LAC, and MENA. In SSA,  
5  
6 however, intake changes from meat prices were significantly larger, but the estimates for dairy  
7  
8 and oils and fats prices show considerable IQR overlap.  
9  
10

11  
12 Results also indicated that middle-aged groups (age 40-60 years) were the least sensitive  
13  
14 to price changes. This was consistent with expectations as the middle-aged often have higher  
15  
16 incomes and may be less sensitive to price changes. Based on the “All Countries” estimates  
17  
18 (upper left panel), the median intake response from a two-fold increase in meat prices was -2.10  
19  
20 percentage points (age 20), responsiveness then decreased to -1.32 percentage points by age 50,  
21  
22 and then increased to -2.71 percentage points by age 80. There was a similar pattern for dairy  
23  
24 and oils and fats prices, but the differences between age groups were not as large.  
25  
26  
27  
28  
29

## 30 31 **DISCUSSION**

32  
33 This investigation provides evidence on how differences in income and food prices might jointly  
34  
35 influence SF consumption by sex and age across the spectrum of rich and poor countries. Both  
36  
37 the country-level and disaggregated (age and sex) analysis indicated that intake differences due  
38  
39 to income were insignificant. These results suggest that intake differences across countries are  
40  
41 better explained by regional dissimilarities and not economic wellbeing as measured by per-  
42  
43 capita income. In contrast, differences due to food prices were highly significant. Globally, a  
44  
45 one-percent increase in prices was estimated to decrease SF intake by about 0.40%. Across  
46  
47 regions, meat-price sensitivity of SF intake was relatively high, except for S-Asia where dairy  
48  
49 price sensitivity of SF intake was higher. Within regions and by age, price sensitivity was lowest  
50  
51 among middle-aged adults.  
52  
53  
54  
55  
56  
57  
58  
59  
60

1  
2  
3 The higher sensitivity of SF intake to price changes in meat consumption suggests that  
4 fiscal policies focused on a reducing SF intake would be more effective through meat-price  
5 interventions. That said, the magnitudes of price sensitivity were small, indicating relatively  
6 inelastic demand. Thus, high taxes would be needed to reduce intake: for example, global  
7 findings suggest that a two-fold increase in meat prices (i.e., a 100% tax) is associated with  
8 decreased intake of only 2.47 percentage points. Our results are consistent with previous  
9 findings. Research has shown that fat taxes in Denmark, Hungary, and France had small and  
10 ambiguous effects on demand.(40, 41) A similar outcome was observed from the Danish fat tax  
11 experience that targeted dairy and vegetable fat sources.(42)  
12  
13  
14  
15  
16  
17  
18  
19  
20  
21  
22  
23

24 The findings in this study can help to inform strategies that counter worsening diets.  
25 However, our modeling cannot prove causality of price changes on intake, and thus our findings  
26 should be interpreted cautiously when informing interventions and evaluations. Furthermore, the  
27 invariability of price and income across demographic subgroups ignores differences within  
28 countries and may have affected results, although we address this issue, in part, with age and sex  
29 variable interactions. Although the lack of price data for other food categories limited our ability  
30 to parse out other intake-price relationships, to the degree that our derived SF price series based  
31 on meat, dairy, and oils and fats is representative of a “true” global SF price the aggregate price  
32 effects could be applied to other food categories.  
33  
34  
35  
36  
37  
38  
39  
40  
41  
42  
43

44 The benefit of our analysis is the country coverage. While relationships between income,  
45 prices, and food choice have been studied, combining GDD, World Bank, and ICP data allowed  
46 for a global coverage rarely seen in food and nutrition research, allowing for comparisons across  
47 individuals in rich and poor countries and an examination of intake responsiveness by age and  
48 sex.(37, 38)  
49  
50  
51  
52  
53  
54  
55  
56  
57

## CONCLUSION

Our results provide novel global evidence on how income and prices influence SF intake by region, age, and sex. Our results confirm that the effectiveness of price interventions would be limited in most countries but provide evidence where interventions would be most effective if implemented (meat versus dairy or oils and fats; youth, young adults, and the elderly). These observed relationships can assist policymakers as they consider how pricing policies can be leveraged to tackle nutrition challenges.

**Table 1. Descriptive statistics for study variables**

| Variable                  | Measure           | Mean     | Std. Dev. | Min   | Max       |
|---------------------------|-------------------|----------|-----------|-------|-----------|
| SF intake                 | % energy/d        | 10.83    | 3.09      | 2.39  | 27.48     |
| Female                    | Binary            | 0.50     | 0.50      | 0     | 1         |
| Age                       | 5-year intervals* | 45.6     | 30.83     | 1     | 98        |
| ASIA                      | Binary            | 0.09     | 0.29      | 0     | 1         |
| CEE                       | Binary            | 0.17     | 0.37      | 0     | 1         |
| HIC                       | Binary            | 0.15     | 0.36      | 0     | 1         |
| LAC                       | Binary            | 0.18     | 0.39      | 0     | 1         |
| MENA                      | Binary            | 0.10     | 0.30      | 0     | 1         |
| S-ASIA                    | Binary            | 0.04     | 0.20      | 0     | 1         |
| SSA                       | Binary            | 0.27     | 0.44      | 0     | 1         |
| Real GDP per capita (PPP) | \$/person         | \$22,226 | \$21,646  | \$780 | \$117,245 |
| Deflated price            | index (US=1)      | 1.00     | 0.12      | 0.71  | 1.40      |

SF is saturated fat. Note that  $n = 7,040$  (160 countries  $\times$  44 demographic subgroups);  $n = 160$  for the GDP and price index. East and Southeast Asia (ASIA), Central and Eastern Europe and Central Asia (CEE), Latin America and Caribbean (LAC), Middle East and North Africa (MENA), South Asia (S-ASIA), Sub-Saharan Africa (SSA), and High-Income Countries/Rest of World (HIC). PPP is purchasing power parity.

**Table 2 Saturated fat intake estimates using country and demographic (sex and age) level data (n = 7,040)**

|                          | Model 1         | Model 2          | Model 3         | Model 4         |
|--------------------------|-----------------|------------------|-----------------|-----------------|
| Constant                 | 14.64 (0.39)*** | 2.81 (1.73)      | 12.44 (2.89)*** | 12.01 (2.90)*** |
| ASIA                     | -2.20 (1.14)*   |                  | -1.61 (1.12)    | -1.61 (1.12)    |
| CEE                      | -1.94 (0.48)*** |                  | -1.68 (0.51)*** | -1.68 (0.51)*** |
| LAC                      | -3.97 (0.49)*** |                  | -4.09 (0.65)*** | -4.09 (0.65)*** |
| MENA                     | -3.98 (0.52)*** |                  | -3.35 (0.55)*** | -3.35 (0.55)*** |
| S-ASIA                   | -7.26 (1.00)*** |                  | -6.08 (1.08)*** | -6.08 (1.08)*** |
| SSA                      | -4.03 (0.49)*** |                  | -3.47 (0.81)*** | -3.47 (0.81)*** |
| Female                   | 0.48 (0.04)***  | 0.48 (0.04)***   | 0.48 (0.04)***  | 0.06 (0.31)     |
| Age                      | -0.04 (0.01)*** | -0.04 (0.008)*** | -0.04 (0.01)*** | -0.10 (0.04)*** |
| Age <sup>2</sup>         | 0.00 (0.00)***  | 0.00 (0.00)***   | 0.00 (0.00)***  | 0.00 (0.00)***  |
| ln(Y)                    |                 | 0.93 (0.18)***   | 0.19 (0.26)     | 0.24 (0.27)     |
| Female × ln(Y)           |                 |                  |                 | 0.04 (0.04)     |
| Age × ln(Y)              |                 |                  |                 | 0.01 (0.00)     |
| Age <sup>2</sup> × ln(Y) |                 |                  |                 | 0.00 (0.00)***  |
| ln(P)                    |                 | -3.73 (1.59)***  | -4.32 (1.88)**  | -7.16 (2.29)*** |
| Female × ln(P)           |                 |                  |                 | -0.13 (0.14)    |
| Age × ln(P)              |                 |                  |                 | 0.20 (0.06)***  |
| Age <sup>2</sup> × ln(P) |                 |                  |                 | 0.00 (0.00)***  |
| Adjusted R <sup>2</sup>  | 0.34            | 0.18             | 0.36            | 0.37            |

Dependent variable is saturated fat intake in % energy/d. Robust standard errors (clustered by country) are in (parenthesis). \* $p \leq 0.10$ ; \*\* $p \leq 0.05$ ; \*\*\* $p \leq 0.01$ . East and Southeast Asia (ASIA), Central and Eastern Europe (CEE), Latin America and Caribbean (LAC), Middle East and North Africa (MENA), South Asia (S-ASIA), and Sub-Saharan Africa (SSA). Y is real GDP per capita, purchasing-power-parity adjusted. P is an inflation adjusted price index for meats, dairy products and eggs, and oils and fats.



## List of Figures

**Figure 1. Comparison of percentage energy from saturated fat among individuals in sex, age, and country-specific strata globally and across world regions.** Note that  $n = 7,040$  (160 countries  $\times$  44 demographic subgroups). Female  $n = 3,520$ ; male  $n = 3,520$ .

Age categories: Age $\leq 19$   $n = 1,920$ ; Age $\geq 60$   $n = 2,560$ ; for all other age groups  $n = 640$ ;  
Regions: South Asia  $n = 308$ ; Sub-Saharan Africa  $n = 1,892$ ; Central and Eastern Europe  $n = 1,188$ ; Middle East and North Africa  $n = 704$ ; Latin America and Caribbean  $n = 1,276$ ; High-Income Countries  $n = 1,056$ ; Asia  $n = 616$ .

Source: Global Dietary Database, 2018.

**Figure 2. Change in saturated fat intake when prices double for each food category.**

Intake change values measure the change in % energy/d from saturated fat. Boxes denote the median value and IQR, error bars are min and max values, and data points are outliers.

**Figure 3. Change in saturated fat intake when prices double for each food category by select region and age.**

Intake change values measure the change in % energy/d from saturated fat. Boxes denote the median value and IQR and error bars are min and max values.

### **Contributorship statement**

AA and AM contributed to the study conceptualization; JR, PS, JZ, FC, JEM VM, and DM contributed to data cu and data curation; AA and AM contributed to the methodology and economic analysis; AA, AM, JNY, DM contributed to writing (original draft); AA, AM, and JNY contributed to writing (review and editing); AA and AM are joint senior authors. Collaborators are listed in the supplemental appendix.

### **Competing interests**

There are no competing interests for any author.

### **Funding**

No funding organization contributed to this research.

### **Data sharing statement**

The expenditure and price data are available in a public, open access repository managed by the World Bank. The intake data can be obtained from the Global Dietary Database (GDD) through a data user agreement. The GDD is maintained by the Global Nutrition and Policy Consortium at Tufts Friedman School of Nutrition Science and Policy.

### **Ethical statement**

This study does not involve human participants.

## References

1. Forouhi NG, Krauss RM, Taubes G, Willett W. Dietary fat and cardiometabolic health: evidence, controversies, and consensus for guidance. *BMJ*. 2018;361.
2. Yu E, Hu FB. Dairy Products, Dairy Fatty Acids, and the Prevention of Cardiometabolic Disease: a Review of Recent Evidence. *Curr Atheroscler Rep*. 2018;20(5):24.
3. Siri-Tarino PW, Sun Q, Hu FB, Krauss RM. Meta-analysis of prospective cohort studies evaluating the association of saturated fat with cardiovascular disease. *The American Journal of Clinical Nutrition*. 2010;91(3):535-46.
4. Dehghan M, Mente A, Zhang X, Swaminathan S, Li W, Mohan V, et al. Associations of fats and carbohydrate intake with cardiovascular disease and mortality in 18 countries from five continents (PURE): a prospective cohort study. *The Lancet*. 2017;390(10107):2050-62.
5. Khan R, Misra K, Singh V. Will a Fat Tax Work? *Marketing Science*. 2016;35(1):10-26.
6. Powell LM, Chaloupka FJ. Food Prices and Obesity: Evidence and Policy Implications for Taxes and Subsidies. *The Milbank Quarterly*. 2009;87(1):229-57.
7. Powell LM, Chriqui JF, Wada R, Chaloupka FJ. Assessing the potential effectiveness of food and beverage taxes and subsidies for improving public health: a systematic review of prices, demand and body weight outcomes. *Obesity Reviews*. 2013;14(2):110-28.
8. World Health Organization. Fiscal Policies for Diet and the Prevention of Noncommunicable Diseases. Technical Meeting Report. Geneva, Switzerland: World Health Organization; 2016.
9. Aguilar A, Gutierrez E, Seira E. The effectiveness of sin food taxes: Evidence from Mexico. *Journal of Health Economics*. 2021;77:102455.
10. Blakely T, Cleghorn C, Mizdrak A, Waterlander W, Nghiem N, Swinburn B, et al. The effect of food taxes and subsidies on population health and health costs: a modelling study. *The Lancet Public Health*. 2020;5(7):e404-e13.
11. Caro JC, Ng SW, Taillie LS, Popkin BM. Designing a tax to discourage unhealthy food and beverage purchases: The case of Chile. *Food Policy*. 2017;71:86-100.
12. Cornelsen L, Mazzocchi M, Smith RD. Fat tax or thin subsidy? How price increases and decreases affect the energy and nutrient content of food and beverage purchases in Great Britain. *Social Science & Medicine*. 2019;230:318-27.
13. Cawley J, Thow AM, Wen K, Frisvold D. The Economics of Taxes on Sugar-Sweetened Beverages: A Review of the Effects on Prices, Sales, Cross-Border Shopping, and Consumption. *Annual Review of Nutrition*. 2019;39(1):317-38.

14. Popkin BM, Ng SW. Sugar-sweetened beverage taxes: Lessons to date and the future of taxation. *PLOS Medicine*. 2021;18(1):e1003412.
15. Andreyeva T, Chaloupka FJ, Brownell KD. Estimating the potential of taxes on sugar-sweetened beverages to reduce consumption and generate revenue. *Preventive Medicine*. 2011;52(6):413-6.
16. Andreyeva T, Long MW, Brownell KD. The impact of food prices on consumption: a systematic review of research on the price elasticity of demand for food. *American Journal of Public Health*. 2010;100(2):216-22.
17. Blaylock J, Smallwood D, Kassel K, Variyam J, Aldrich L. Economics, food choices, and nutrition. *Food Policy*. 1999;24(2-3):269-86.
18. Muhammad A, Seale JL, Meade B, Regmi A. International evidence on food consumption patterns: an update using 2005 international comparison program data. Washington, D.C.: Economic Research Service, USDA; 2011. Report No.: 1929.
19. Andrew M, Anna DS, Birgit M, Renata M, Dariush M. How income and food prices influence global dietary intakes by age and sex: evidence from 164 countries. *BMJ Global Health*. 2017;2(3):e000184.
20. Andrew M, Birgit M, David RM, Dariush M. Global patterns in price elasticities of sugar-sweetened beverage intake and potential effectiveness of tax policy: a cross-sectional study of 164 countries by sex, age and global-income decile. *BMJ Open*. 2019;9(8):e026390.
21. Elmadfa I, Kornsteiner M. Dietary Fat Intake – A Global Perspective. *Annals of Nutrition and Metabolism*. 2009;54(suppl 1)(Suppl. 1):8-14.
22. Micha R, Khatibzadeh S, Shi P, Fahimi S, Lim S, Andrews KG, et al. Global, regional, and national consumption levels of dietary fats and oils in 1990 and 2010: a systematic analysis including 266 country-specific nutrition surveys. *BMJ : British Medical Journal*. 2014;348:g2272.
23. Behrman JR, Wolfe BL. More evidence on nutrition demand: Income seems overrated and women's schooling underemphasized. *Journal of Development Economics*. 1984;14(1):105-28.
24. Huang KS. Nutrient Elasticities in a Complete Food Demand System. *American Journal of Agricultural Economics*. 1996;78(1):21-9.
25. Lancaster KJ. A New Approach to Consumer Theory. *Journal of Political Economy*. 1966;74(2):132.
26. [dataset] Global Nutrition and Policy Consortium. Global Dietary Database. 2022. <https://www.globaldietarydatabase.org/about-us>.

- 1
- 2
- 3 27. Khatibzadeh S, Saheb Kashaf M, Micha R, Fahimi S, Shi P, Elmadfa I, et al. A global
- 4 database of food and nutrient consumption. *Bull World Health Organ.* 2016;94(12):931-4.
- 5
- 6 28. Miller V, Reedy J, Cudhea F, Zhang J, Shi P, Erndt-Marino J, et al. Global, regional, and
- 7 national consumption of animal-source foods between 1990 and 2018: findings from the Global
- 8 Dietary Database. *Lancet Planet Health.* 2022;6(3):e243-e56.
- 9
- 10 29. World Bank. *Purchasing Power Parities and the Size of World Economies : Results from*
- 11 *the 2017 International Comparison Program.* Washington, DC: World Bank Group; 2020.
- 12
- 13
- 14 30. Huth PJ, Fulgoni VL, Keast DR, Park K, Auestad N. Major food sources of calories,
- 15 added sugars, and saturated fat and their contribution to essential nutrient intakes in the U.S. diet:
- 16 data from the national health and nutrition examination survey (2003–2006). *Nutrition Journal.*
- 17 *2013;12(1):116.*
- 18
- 19
- 20 31. World Bank. *Purchasing Power Parities and the Real Size of World Economies: A*
- 21 *Comprehensive Report of the 2011 International Comparison Program.* World Bank. 2015.
- 22
- 23 32. World Bank. *Purchasing Power Parities for Policy Making: A Visual Guide to Using*
- 24 *Data from the International Comparison Program.* Washington, DC: World Bank; 2021
- 25 *2021/06/10/.*
- 26
- 27
- 28 33. [dataset] World Bank. *World Development Indicators.* 2023.
- 29 <https://databank.worldbank.org/source/world-development-indicators>.
- 30
- 31 34. LaFrance JT. Incomplete demand systems and semilogarithmic demand models.
- 32 *Australian Journal of Agricultural Economics.* 1990;34(2):118-31.
- 33
- 34 35. von Haefen RH. A complete characterization of the linear, log-linear, and semi-log
- 35 incomplete demand system models. *Journal of Agricultural and Resource Economics.*
- 36 *2002;27(2):281-319.*
- 37
- 38 36. Sahn DE. The Effect of Price and Income Changes on Food-Energy Intake in Sri Lanka.
- 39 *Economic Development and Cultural Change.* 1988;36(2):315-40.
- 40
- 41
- 42 37. Muhammad A, D'Souza A, Meade B, Micha R, Mozaffarian D. How income and food
- 43 prices influence global dietary intakes by age and sex: evidence from 164 countries. *BMJ Global*
- 44 *Health.* 2017;2(3):e000184.
- 45
- 46 38. Muhammad A, Meade B, Marquardt DR, Mozaffarian D. Global patterns in price
- 47 elasticities of sugar-sweetened beverage intake and potential effectiveness of tax policy: a cross-
- 48 sectional study of 164 countries by sex, age and global-income decile. *BMJ Open.*
- 49 *2019;9(8):e026390.*
- 50
- 51
- 52 39. Cameron AC, Trivedi PK. *Microeconometrics: Methods and Applications.* Cambridge:
- 53 *Cambridge University Press; 2005.*
- 54
- 55
- 56
- 57
- 58
- 59
- 60

- 1  
2  
3 40. Allais O, Bertail P, Nichèle V. The Effects of a Fat Tax on French Households'  
4 Purchases: A Nutritional Approach. *American Journal of Agricultural Economics*.  
5 2010;92(1):228-45.  
6  
7  
8 41. Smed S, Scarborough P, Rayner M, Jensen JD. The effects of the Danish saturated fat tax  
9 on food and nutrient intake and modelled health outcomes: an econometric and comparative risk  
10 assessment evaluation. *European Journal of Clinical Nutrition*. 2016;70(6):681-6.  
11  
12 42. Vallgård S, Holm L, Jensen JD. The Danish tax on saturated fat: why it did not survive.  
13 *European Journal of Clinical Nutrition*. 2015;69(2):223-6.  
14  
15  
16  
17  
18  
19  
20  
21  
22  
23  
24  
25  
26  
27  
28  
29  
30  
31  
32  
33  
34  
35  
36  
37  
38  
39  
40  
41  
42  
43  
44  
45  
46  
47  
48  
49  
50  
51  
52  
53  
54  
55  
56  
57  
58  
59  
60

For peer review only

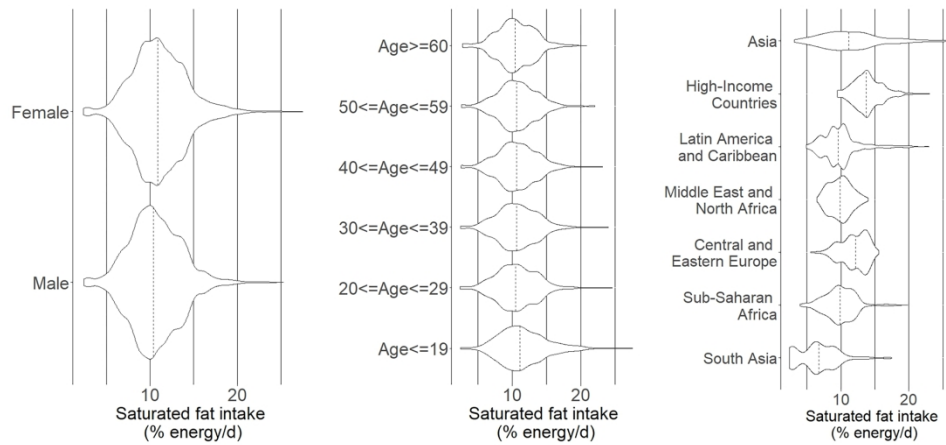

Figure 1. Comparison of percentage energy from saturated fat among individuals in sex, age, and country-specific strata globally and across world regions. Note that  $n = 7,040$  (160 countries  $\times$  44 demographic subgroups). Female  $n = 3,520$ ; male  $n = 3,520$ . Age categories: Age  $\leq 19$   $n = 1,920$ ; Age  $\geq 60$   $n = 2,560$ ; for all other age groups  $n = 640$ ; Regions: South Asia  $n = 308$ ; Sub-Saharan Africa  $n = 1,892$ ; Central and Eastern Europe  $n = 1,188$ ; Middle East and North Africa  $n = 704$ ; Latin America and Caribbean  $n = 1,276$ ; High-Income Countries  $n = 1,056$ ; Asia  $n = 616$ . Source: Global Dietary Database, 2018.

203x101mm (300 x 300 DPI)



Figure 2. Change in saturated fat intake when prices double for each food category. Intake change values measure the change in % energy/d from saturated fat. Boxes denote the median value and IQR, error bars are min and max values, and data points are outliers.

145x94mm (300 x 300 DPI)





Figure 3. Change in saturated fat intake when prices double for each food category by select region and age. Intake change values measure the change in % energy/d from saturated fat. Boxes denote the median value and IQR and error bars are min and max values.

381x426mm (300 x 300 DPI)

## Supplemental Appendix

### Supplemental Table 1. Countries included in study by defined region

| Region                                                                      | Countries                                                                                                                                                                                                                                                                                                                                                                                                                                                        |
|-----------------------------------------------------------------------------|------------------------------------------------------------------------------------------------------------------------------------------------------------------------------------------------------------------------------------------------------------------------------------------------------------------------------------------------------------------------------------------------------------------------------------------------------------------|
| Southeast Asia, East Asia, and High-Income Asia Pacific (ASIA) 14 countries | Brunei Darussalam, Cambodia, China, Fiji, Indonesia, Japan, Laos, Malaysia, Myanmar, Philippines, Singapore, South Korea, Thailand, and Vietnam.                                                                                                                                                                                                                                                                                                                 |
| Central Europe, Eastern Europe, and Central Asia (CEE) 27 countries         | Albania, Armenia, Azerbaijan, Belarus, Bosnia and Herzegovina, Bulgaria, Croatia, Czech Republic, Estonia, Georgia, Hungary, Kazakhstan, Kyrgyz Republic, Latvia, Lithuania, Macedonia, Moldova, Mongolia, Montenegro, Poland, Romania, Russia, Serbia, Slovak Republic, Slovenia, Tajikistan, and Ukraine.                                                                                                                                                      |
| Latin America and the Caribbean (LAC) 29 countries                          | Antigua and Barbuda, Argentina, Bahamas, Barbados, Belize, Bolivia, Brazil, Chile, Colombia, Costa Rica, Dominica, Dominican Republic, Ecuador, El Salvador, Grenada, Guyana, Haiti, Honduras, Jamaica, Mexico, Nicaragua, Panama, Paraguay, Peru, St. Lucia, St. Vincent and Grenadines, Suriname, Trinidad and Tobago, and Uruguay.                                                                                                                            |
| Middle East and North Africa (MENA) 17 countries                            | Algeria, Bahrain, Egypt, Iran, Iraq, Israel, Jordan, Kuwait, Morocco, Oman, Qatar, Saudi Arabia, Tunisia, Turkey, United Arab Emirates, and West Bank and Gaza.                                                                                                                                                                                                                                                                                                  |
| South Asia (S-ASIA) – 7 countries                                           | Bangladesh, Bhutan, India, Maldives, Nepal, Pakistan, and Sri Lanka.                                                                                                                                                                                                                                                                                                                                                                                             |
| Sub-Saharan Africa (SSA) 43 countries                                       | Angola, Benin, Botswana, Burkina Faso, Burundi, Cabo Verde, Cameroon, Central African Republic, Chad, Comoros, Congo DR, Congo, Côte d'Ivoire, Djibouti, Equatorial Guinea, Eswatini, Ethiopia, Gabon, Gambia, Ghana, Guinea, Guinea Bissau, Kenya, Lesotho, Liberia, Madagascar, Malawi, Mali, Mauritania, Mauritius, Mozambique, Namibia, Niger, Nigeria, Rwanda, São Tomé and Príncipe, Senegal, Seychelles, Sierra Leone, Sudan, Tanzania, Togo, and Uganda. |
| High Income/Rest of World (HIC) 24 countries                                | Australia, Austria, Belgium, Canada, Cyprus, Denmark, Finland, France, Germany, Greece, Iceland, Ireland, Italy, Luxembourg, Malta, Netherlands, New Zealand, Norway, Portugal, Spain, Sweden, Switzerland, United Kingdom, and United States.                                                                                                                                                                                                                   |

**Supplemental Table 2. Saturated fat intake estimates using country level data ( $n = 160$ )**

|                         | Model 1         | Model 2        | Model 3         | Model 4         |
|-------------------------|-----------------|----------------|-----------------|-----------------|
| Constant                | 13.66 (0.46)*** | 1.03 (1.75)    | 10.81 (0.23)*** | 12.05 (2.87)*** |
| ASIA                    | -1.19 (0.76)    |                |                 | -0.66 (0.81)    |
| CEE                     | -1.36 (0.63)**  |                |                 | -1.16 (0.67)*   |
| LAC                     | -4.07 (0.62)*** |                |                 | -4.26 (0.74)*** |
| MENA                    | -3.43 (0.73)*** |                |                 | -2.85 (0.77)*** |
| S-ASIA                  | -7.41 (0.97)*** |                |                 | -6.34 (1.10)*** |
| SSA                     | -4.07 (0.58)*** |                |                 | -3.65 (0.90)*** |
| ln(Y)                   |                 | 1.03 (0.18)*** |                 | 0.14 (0.26)     |
| ln(P)                   |                 |                | -3.90 (1.94)**  | -4.33 (1.89)**  |
| Adjusted R <sup>2</sup> | 0.39            | 0.16           | 0.02            | 0.41            |

Dependent variable is saturated fat intake measured in % energy/d. Robust standard errors are in (parenthesis). \* $p \leq 0.10$ ; \*\* $p \leq 0.05$ ; \*\*\* $p \leq 0.01$ . East and Southeast Asia (ASIA), Central and Eastern Europe and Central Asia (CEE), Latin America and Caribbean (LAC), Middle East and North Africa (MENA), South Asia (S-ASIA), and Sub-Saharan Africa (SSA). Y is real GDP per capita, purchasing-power-parity adjusted. P is an inflation adjusted price index for meats, dairy products and eggs, and oils and fats.

## Income, Price, and Expenditure Data Across Countries

Supplemental Figures 1 – 3 contain box plots by region for the country-specific explanatory variables.

**Supplemental Figure 1** shows real GDP per capita (PPP) for the seven regions in our study. The highest GDP region is High-Income Countries, which is unsurprising. The median income for High-Income Countries was \$51,432 per person. In contrast, Sub-Saharan Africa had the smallest real GDP per capita, with a median value of \$3,147.

**Supplemental Figure 2** shows expenditure shares for the contributing food categories: meats, dairy, and oils and fats by region. Food expenditure shares were derived from the World Bank International Comparison Program (ICP) which allows for global spending comparisons by standardizing expenditures to a common currency (U.S. Dollars). Across regions, meat expenditures were the highest food expenditure category, except for South Asia. In South Asia, the median dairy food expenditure share was the highest at 0.47 and the interquartile range (IQR) was 0.34 to 0.60. Asia, Latin America and Caribbean, and Sub-Saharan Africa were the regions with the highest median expenditures for meats at 0.65 and an IQR from 0.55 to 0.74. South Asia has the lowest meat expenditure share at 0.31 with an IQR from 0.16 to 0.48. Apart from South Asia, dairy expenditure shares represented the second highest expenditure shares across regions. Oils and fats account for the smallest share of food expenditures compared to the other food categories for all regions.

**Supplemental Figure 3** shows the price indexes for meat, dairy, and oil and fats, and the weighted average price index (weighted based on the expenditures in Supplemental Figure 2) by region. The weighted average food price index is the sum of each price index times the expenditure share for the corresponding food category. Most regions exhibit relatively similar values across price index categories and shorter “whiskers” include Central and Eastern Europe, Middle East and North Africa, and South Asia. Alternatively, some regions (High-Income Countries, Latin America and Caribbean, and Sub-Saharan Africa) exhibit a greater range between the IQR and maximum and minimum values and greater variation in prices. For example, in the Latin American and Caribbean region, the dairy price index has a median value of 134.49 and IQR of 98.60 to 156.59. In contrast, the Central and Eastern Europe region has a dairy price index median value of 86.58 and IQR range of 75.84 to 93.50.

1  
2  
3  
4  
5  
6  
7  
8  
9  
10  
11  
12  
13  
14  
15  
16  
17  
18  
19  
20  
21  
22  
23  
24  
25  
26  
27  
28  
29  
30  
31  
32  
33  
34  
35  
36  
37  
38  
39  
40  
41  
42  
43  
44  
45  
46  
47

Supplemental Figure 1. Real GDP Per Capita (PPP) by Region



Source: Authors' estimates using income data from the World Bank Development Indicators.

Supplemental Figure 2. Food Expenditure Shares by Region



Source: Authors' estimates using income data from the World Bank International Comparison Program.

1  
2  
3  
4  
5  
6  
7  
8  
9  
10  
11  
12  
13  
14  
15  
16  
17  
18  
19  
20  
21  
22  
23  
24  
25  
26  
27  
28  
29  
30  
31  
32  
33  
34  
35  
36  
37  
38  
39  
40  
41  
42  
43  
44  
45  
46  
47

Supplemental Figure 3. Price Indexes for each Food Category and Weighted Average by Region



Source: Authors' estimates using income data from the World Bank International Comparison Program.

## Global Dietary Database Corresponding Members

Pamela Abbott, Director of the Centre for Global Development, University of Aberdeen, UK; Morteza Abdollahi, National Nutrition and Food Technology Research Institute (NNFTRI): SBMU; Parvin Abedi, Menopause Andropause Research Center, Ahvaz Jundishapur University of Medical Sciences; Suhad Abumweis, Al Ain University, Abu Dhabi, UAE; Linda Adair; Mohannad Al Nsour, Eastern Mediterranean Public Health Network: EMPHNET; Iftikhar Alam, BKUC.edu.pk; Nasser Al-Daghri and Dr. Shaun Sabico, King Saud University, Saudi Arabia; Nawal Ai, alHamad, Public Authority For Food and Nutrition, Kuwait; Suad Al-Hooti, Kuwait Institute for Scientific Research; Eman Alissa, King Abdulaziz University; Sameer Al-Zenki; Simon Anderson, University of Manchester; Karim Anzid, Cadi Ayyad University; Carukshi Arambepola, Faculty of Medicine, University of Colombo, Sri Lanka; Mustafa Arici, Hacettepe University Faculty of Medicine; Joanne Arsenault, FHI Solutions; Renzo Asciale; Lajos Biró; Noël Barengo, Herbert Wertheim College of Medicine; Simon Barquera, Juan Rivera Dommarco, Daniel Illescas-Zarate, Luz Maria Sánchez-Romero, Sonia Rodriguez Ramirez, and Ivonne Ramirez Silva, National Institute of Public Health (INSP), Mexico; Murat Bas, Acibadem University; Wulf Becker; Sigrid Beer-Borst; Per Bergman, Anna Karin Lindroos, Jessica Petrelius Sipinen, and Lotta Moraeus, Swedish National Food Agency; Sesikeran Boindala, National Institute of Nutrition India; Pascal Bovet, University Center for Primary Care and Public Health (Unisanté), Lausanne, Switzerland, and Ministry of Health, Seychelles; Debbie Bradshaw; Noriklil Bukhary Ismail Bukhary, Ministry of Health (Malaysia); Kanitta Bundhamcharoen; Mauricio T. Caballero, Fundacion INFANT and Consejo Nacional De Investigaciones Cientificas y Tecnicas (CONICET); Neville Calleja, Directorate for Health Information & Research; Xia Cao; Mario Capanzana, Food and Nutrition Research Institute, Department of Science and Technology; Jan Carmikle, Senior Intellectual Property Office; Katia Castetbon, Institut de Veille Sanitaire; Michelle Castro, Departamento de Alimentação Escolar; Corazon Cerdana; Hsing-Yi Chang, National Health Research Institutes; Karen Charlton; Yu Chen, NYU School of Medicine; Shashi Chiplonkar, HC Jehangir Medical Research Institute, Pune India; Yoonsu Cho, Korea University; Khun-Aik Chuah; Simona Costanzo, Marialaura Bonaccio, and Licia Iacoviello, IRCCS INM Neuromed; Melanie Cowan; Albertino Damasceno, Faculty of Medicine, Eduardo Mondlane University, Maputo, Mozambique; Saeed Dastgiri, Tabriz University of Medical Sciences; Stefaan De Henauw and Carl Lachat, Ghent University, Belgium; Karin DeRidder, Belgian Public Health Institute; Eric Ding, Harvard School of Public Health; Rokiah Don; Charmaine Duante; Vesselka Duleva, National Center for Public Health, Sofia, Bulgaria; Samuel Duran Aguero, Universidad San Sebastian, Chile; Veena Ekbote, Hirabai Cowasji Jehangir Medical Research Institute, Jehangir Hospital, Pune, India; Jalila El Ati, National Institute of Nutrition and Food Technology & SURVEN RL; Alison Eldridge, Nestle Research Center; Tatyana El-kour and Laetitia Nikiema, World Health Organization (WHO); Ibrahim Elmadfa, University of Vienna; Helene Enghardt Barbieri; Alireza Esteghamati, Tehran University of Medical Sciences; Zohreh Etemad, Dutch National Institute for Public Health and the Environment (RIVM); Fariza Fadzil, Ministry of Health, Malaysia; Farshad Farzadfar; Mei Fen Chan; Anne Fernandez, Perdana University, Royal College of Surgeons in Ireland; Dulitha Fernando; Regina Fisberg, University of Sao Paulo, Brazil; Simon Forsyth, The University of Queensland School of Public Health; Edna Gamboa Delgado, Fundacion Cardiovascular de Colombia; Didier Garriguet, Statistics Canada; Jean-Michel Gaspoz; Dorothy Gauci; Johanna M. Geleijnse, Wageningen University; Brahmam Ginnela;



1  
2  
3 Giuseppe Grosso, Department of Biomedical and Biotechnological Sciences, University of  
4 Catania, Italy; Idris Guessous, Geneva University Hospitals; Martin Gulliford, King's College  
5 London; Ingibjorg Gunnarsdottir and Inga Thorsdottir, University of Iceland; Holmfridur  
6 Thorgeirsdottir, Directorate of Health, Iceland; Wilbur Hadden; Aida Hadziomeragic, Institute of  
7 Public Health of Federation of Bosnia and Herzegovina; Christian Haerpfer; Jemal Haidar Ali,  
8 Addis Ababa University; Rubina Hakeem, Ziauddin University Karachi; Aminul Haque,  
9 University of Dhaka; Maryam Hashemian, Tehran University of Medical Sciences and Uta  
10 University; Rajkumar Hemalatha, Avula Laxmaiah, Indrapal Meshram, Harikumar Rachakulla,  
11 and Nimmathota Arlappa ICMR-National Institute of Nutrition, Hyderabad; Sigrun Henjum,  
12 Oslo and Akerhus University College; Hristo Hinkov, National Center of Public Health and  
13 Analyses (NCPHA); Zaiton Hjdaud; Daniel Hoffman, Rutgers University; Beth Hopping;  
14 Anahita Houshiar-rad, National Nutrition & Food Technology Research Ins; Yao-Te Hsieh,  
15 Institute of Biomedical Sciences, Academia Sinica, Taipei, Taiwan; Shu-Yi Hung; Inge  
16 Huybrechts, International Agency for Research on Cancer; Nahla Chawkat Hwalla, American  
17 University of Beirut; Nayu Ikeda; Manami Inoue; Olof Jonsdottir; Hamid Jan Bin Jan Mohamed,  
18 Universiti Sains Malaysia; Chandrashekar Janakiram, Amrita School of Dentistry; Ranil  
19 Jayawardena, University of Colombo; Rajesh Jeewon, University of Mauritius; Nattinee Jitnarin;  
20 Lars Johansson; Ola Kally; Mirnalini Kandiah; Tilakavati Karupaiah, National University of  
21 Malaysia; Lital Keinan-Boker, Rebecca Goldsmith, and Tal Shimony, Israel Center for Disease  
22 Control; Roya Kelishadi, Research Institute for Primordial Prevention of NCD, Isfahan  
23 University of Medical Sciences; Anuradha Khadilkar, Hirabai Cowasji Jehangir Medical  
24 Research Institute; Cho-il Kim, Korea Health Industry Development Institute; Eda Koksall, Gazi  
25 University; Jurgen Konig, University of Vienna, Department of Nutritional Sciences; Liisa  
26 Korkalo, Riitta Freese, and Maijaliisa Erkkola, University of Helsinki; Eva Roos, University of  
27 Helsinki, Department of Food and Nutrition; Jeremy Koster, University of Cincinnati; Irina  
28 Kovalskys, ICCAS (Instituto para la cooperacion científica en ambiente y salud), Argentina;  
29 Anand Krishnan, All India Institute of Medical Sciences; Herculina Kruger, North-West  
30 University, Potchefstroom South Africa; Rebecca Kuriyan-Raj, St John's Research Institute;  
31 Kyungwon Oh, Sanghui Kweon and Sihyun Park, Korea Disease Control and Prevention Agency  
32 (KDCA); Yuen Lai; Pulani Lanerolle, University of Colombo, Sri Lanka; Indu Waidyatilaka,  
33 University of Colombo, Sri Lanka; Catherine Leclercq; Meei-Shyuan Lee; Hae-Jeung Lee, Eulji  
34 University; J Lennert Veerman, The University of Queensland; Lydia Lera Marques, Unidat de  
35 Nutricion Publica-Professor Asociado; Yanping Li, Harvard School of Public Health; Jaana  
36 Lindström; Annie Ling; Nur Indrawaty Lipoeto, Andalas University; Patricio Lopez-Jaramillo,  
37 FOSCAL and UDES; Amy Luke, Loyola University Chicago; Widjaja Lukito; Nuno Lunet,  
38 Faculty of Medicine, University of Porto, Portugal; Carla Lopes and Milton Severo, Faculty of  
39 Medicine/ Institute of Public Health, University of Porto, Portugal; Duarte Torres, Faculty of  
40 Nutrition and Food Sciences / Institute of Public Health, University of Porto, Portugal; Elisabette  
41 Lupotto, Aida Turrini, Stefania Sette, and Raffaella Piccinelli, CREA-Alimenti e Nutrizione;  
42 Guansheng Ma; Yi Ma; Zaleha Abdullah Mahdy, National University of Malaysia (UKM); Reza  
43 Malekzadeh, Digestive Disease Research Institute, Tehran University of Medical Sciences; Wan  
44 Manan, Universiti Sains Malaysia; Dirce Marchioni, University of Sao Paolo; Pedro Marques-  
45 Vidal, Lausanne University Hospital (CHUV) and University of Lausanne, Switzerland; Yves  
46 Martin-Prevel, Institut de Recherche pour le Developpement; Hajah Masni Ibrahim; Angie  
47 Mathee; Yasuhiro Matsumura, Bunkyo University, Faculty of Health and Nutrition; Paramita  
48 Mazumdar, Centre For Media Studies; Abila M. Sibai, Faculty of Health Sciences - American  
49  
50  
51  
52  
53  
54  
55  
56  
57  
58  
59  
60

1  
2  
3 University of Beirut; Anjum Memon, Brighton and Sussex Medical School, UK; Gert Mensink,  
4 Robert Koch Institute; Alexa Meyer, University of Vienna, Austria; Parvin Mirmiran, Research  
5 Institute for Endocrine Sciences, Shahid Beheshti University of Medical Sciences; Masoud  
6 Mirzaei, Yazd Cardiovascular Research Centre, Shahid Sadoughi University of Medical  
7 Sciences; Puneet Misra, All India Institute of Medical Sciences; Anoop Misra, Fortis CDOC  
8 Center for Excellence for Diabetes; Claudette Mitchell and David Balfour, University of the  
9 Southern Caribbean; Noushin Mohammadifard, Nizal Sarrafzadegan, Moses Mwangi, and  
10 Maryam Maghroun, Isfahan Cardiovascular Research Center, Cardiovascular Research Institute,  
11 Isfahan University of Medical Sciences; Fatemeh Mohammadi-Nasrabadi, National Nutrition  
12 and Food technology Research Institute; Zalilah Mohd Shariff, Universiti Putra Malaysia; Foong  
13 Ming Moy, University of Malaya; Abdulrahman Musaiger, Arab Center for Nutrition; Elizabeth  
14 Mwaniki, The Technical University of Kenya; Jannicke Myhre; Balakrishna Nagalla, National  
15 Institute of Nutrition, Hyderabad; Androniki Naska; Augustin Nawidimbamba Zeba, Institut de  
16 Recherche en sciences de la Sante; Shu Wen Ng, University of North Carolina at Chapel Hill; Le  
17 Tran Ngoan, Hanoi Medical University; Sina Noshad, Tehran University of Medical Sciences;  
18 Angelica Ochoa, Universidad de Cuenca; Marga Ocke, Dutch National Institute for Public  
19 Health and the Environment: RIVM; Jillian Odenkirk; Mariana Oleas, Universidad Tecnica del  
20 Norte; Sonia Olivares, Institute of Nutrition and Food Technology (INTA), University of Chile;  
21 Philippos Orfanos; Johana Ortiz-Ulloa, Cuenca University; Johanna Otero, Fundacion  
22 Oftalmologica de Santander (FOSCAL); Marja-Leena Ovaskainen; Mohammadreza Pakseresht,  
23 University of Alberta; Cristina Palacios, Florida International University; Pam Palmer; Wen-  
24 Harn Pan, Institutes of Biomedical Sciences, Academia Sinica; Demosthenes Panagiotakos,  
25 Harokopio University; Rajendra Parajuli, Tribhuvan University; Gulden Pekcan; Stefka Petrova,  
26 National Centre of Public Health and Analyses; Noppawan Piaseu, Mahidol University; Christos  
27 Pitsavos; Kalpagam Polasa, National Institute of Nutrition; Luz Posada, Universidad de  
28 Antioquia; Farhad Pourfarzi, Ardabil University of Medical Sciences; Alan Martin Preston, Univ  
29 Puerto Rico-Med Sci Dept Biochemistry; Ingrid Rached, Centro de Atencion Nutricional  
30 Antimano (CANIA); Ali Reza Rahbar; Colin Rehm; Almut Richter, Robert Koch Institute;  
31 Leanne Riley; Benoit Salanave; Norie Sawada and Shoichiro Tsugane, National Cancer Center  
32 Institute for Cancer Control, Japan; Makiko Sekiyama, Graduate Program in Sustainability  
33 Science Global Leadership Initiative (GPSS–GLI), The University of Tokyo; Rusidah Selamat;  
34 Khadijah Shamsuddin, Universiti Kebangsaan Malaysia Medical Centre; Sangita Sharma,  
35 University of Alberta; Harri Sinkko; Isabelle Sioen; Ivan Sisa, Universidad San Francisco de  
36 Quito; Sheila Skeaff, University of Otago; Laufey Steingrimsdottir; Tor Strand, University of  
37 Bergen; Milton Fabian Suarez-Ortegon, University of Edinburgh; Sumathi Swaminathan, St  
38 John’s Research Institute; Gillian Swan; Elzbieta Sygnowska; Maria Szabo; Lucjan Szponar,  
39 National Food and Nutrition Institute; Ilse Khouw and Swee Ai Ng, FrieslandCampina, The  
40 Netherlands; Heli Tapanainen, The National Institute for Health and Welfare (THL); Reema  
41 Tayyem, Qatar University and University of Jordan; Bemnet Tedla; Alison Tedstone; Robert  
42 Templeton; Celine Termote, Bioversity International; Anastasia Thanopoulou, Diabetes Center,  
43 2nd Department of Internal Medicine, Athens University, Greece; Dimitrios Trichopoulos;  
44 Antonia Trichopoulou, Hellenic Health Foundation and University of Athens; Coline van  
45 Oosterhout; Erkki Vartiainen; Suvi Virtanen, National Institute for Health and Welfare; Peter  
46 Vollenweider; Marieke Vossenaar, CeSIAM in Guatemala; Eva Warensjo Lemming, Risk and  
47 Benefit Assessment Department, Swedish Food Agency; Anna Waskiewicz, Department of CVD  
48 Epidemiology, Prevention and Health Promotion, Institute of Cardiology, Warsaw, Poland;  
49  
50  
51  
52  
53  
54  
55  
56  
57  
58  
59  
60

1  
2  
3 Lothar Wieler, Robert Koch Institute; Suh Wu; Roseyati Yaakub; Mabel Yap; Safiah Yusof;  
4 Sahar Zaghoul, National Nutrition Institute, Egypt; Gábor Zajkás; Maria Elisa Zapata, CESNI;  
5 Khairul Zarina; Fatemeh Vida Zohoori, Teesside University; Mark Manary, Washington  
6 University in St. Louis; Zipporah Bukania and Yeri Kombe, Kenya Medical Research Institute;  
7 Sirje Vaask, Tallinn University; Julie Long, K. Michael Hambidge, Tshilenge S. Diba,  
8 Shivanand C. Mastiholi, Umber S. Khan, and Gabriela Tejada, University of Colorado Anschutz  
9 Medical Campus; Eha Nurk, Estonian National Institute for Health Development; Keiu Nelis;  
10 Ute Nöthlings and Ute Alexy, University of Bonn, Department of Nutrition and Food Sciences;  
11 Cornelia Tudorie and Anca Nicolau, University Dunarea de Jos, Galati, Romania; Amanda de  
12 Moura Souza, Institute of Studies in Public Health, Federal University of Rio de Janeiro (UFRJ);  
13 Alan de Brauw, Mourad Moursi, International Food Policy Research Institute (IFPRI); Alicia  
14 Roviroso, Centro de Estudios sobre Nutrición Infantil; Carol Henry, Getahun Ersino, and Gordon  
15 Zello, University of Saskatchewan, Saskatoon, Canada; Chanthaly Luangphaxay, Daovieng  
16 Douangvichit, and Latsamy Siengsounthone, Lao Tropical and Public Health Institute; Christine  
17 Hotz; Constance Rybak, Leibniz Centre for Agricultural Landscape Research; Corina Aurelia  
18 Zugravu, University of Medicine and Pharmacy Carol Davila Bucharest Romania; Donka  
19 Baykova, Medical Center Markovs; Elizabeth Yakes-Jimenez, The University of New Mexico;  
20 Gudrun B. Keding, University of Goettingen, Germany; Lydiah M. Waswa, Egerton University,  
21 Kenya; Irmgard Jordan, Justus Liebig University Giessen; J.V. Meenakshi, Delhi School of  
22 Economics, University of Delhi; Josie Desnacido and Imelda Angeles Agdeppa, Food and  
23 Nutrition Research Institute (DOST-FNRI); Justin Chileshe and Sydney Mwanza, Tropical  
24 Diseases Research Centre; Kalyana Sundram, Malaysian Palm Oil Council (MPOC); Laila  
25 Eleraky and Wolfgang Stuetz, University of Hohenheim; Lalka Rangelova, National Centre of  
26 Public Health and Analyses; Lilian Aluso, Julia Boedecker, and Francis Oduor, Consultative  
27 Group on International Agricultural Research (CGIAR); Lluís Serra-Majem, University of Las  
28 Palmas de Gran Canaria (ULPGC), Canary Islands, Spain; Tamene Taye Asayehu, College of  
29 Applied Sciences, Department of Food Science and Applied Nutrition, Addis Ababa Science and  
30 Technology University; Veronika Janská, Public Health Authority of the Slovak Republic; Ward  
31 Siamusantu, National Food and Nutrition Commission; Ken Brown, University of California,  
32 Davis.  
33  
34  
35  
36  
37  
38  
39  
40  
41  
42  
43  
44  
45  
46  
47  
48  
49  
50  
51  
52  
53  
54  
55  
56  
57  
58  
59  
60

## CHEERS 2022 Checklist

| Topic           | No. | Item                                                                                       | Location where item is reported                                                                         |
|-----------------|-----|--------------------------------------------------------------------------------------------|---------------------------------------------------------------------------------------------------------|
| <b>Title</b>    | 1   | Identify the study as an economic evaluation and specify the interventions being compared. | Examining the influence of price and income on global saturated fat intake: evidence from 160 countries |
| <b>Abstract</b> |     |                                                                                            |                                                                                                         |

| Topic               | No. Item                                                                                                | Location where item is reported                                                                                                                                                                                                                                                                                                                                                                                                                                                                                                                                                                                                                                                                                                                                                                                                                                                                                                                                                                                                                                                                                                                                                                                                                                                                                                                                                                                                                                                                                                                                                                                                                                                                                                                                                                   |
|---------------------|---------------------------------------------------------------------------------------------------------|---------------------------------------------------------------------------------------------------------------------------------------------------------------------------------------------------------------------------------------------------------------------------------------------------------------------------------------------------------------------------------------------------------------------------------------------------------------------------------------------------------------------------------------------------------------------------------------------------------------------------------------------------------------------------------------------------------------------------------------------------------------------------------------------------------------------------------------------------------------------------------------------------------------------------------------------------------------------------------------------------------------------------------------------------------------------------------------------------------------------------------------------------------------------------------------------------------------------------------------------------------------------------------------------------------------------------------------------------------------------------------------------------------------------------------------------------------------------------------------------------------------------------------------------------------------------------------------------------------------------------------------------------------------------------------------------------------------------------------------------------------------------------------------------------|
|                     | 2 Provide a structured summary that highlights context, key methods, results, and alternative analyses. | <p>Introduction When considering proposals to improve diets, it is important to understand how factors like price and income can affect saturated fat intake and demand. This is even more important when considering economic interventions on a global scale. In this study, we examine and estimate the influence of price and income on intake across 160 countries, by age and sex, and derive sensitivity measures (elasticities) that vary by age, sex, and geographic region. Methods Secondary data were used for this analysis. Intake data by age, sex, and country were obtained from the 2018 Global Dietary Database. These data were then linked to global price data for select food groups from the World Bank International Comparison Program and income data from the World Development Indicators Databank (World Bank). We estimated intake responsiveness to income and prices, accounting for differences by world region, age, and sex. Results Intake differences due to price were highly significant, with a one percent increase in price associated with lower SF intake (% energy/d) of about 4.3 percentage points. Results indicated that the highest price sensitivity was due to meat consumption. We also find significant differences across regions. In high-income countries, median (age 40) intake reductions were e 1.4, 0.8, and 0.2 percentage points, given a one-percent increase in the price of meat, dairy, and oils and fats, respectively. Intake differences due to income were insignificant. Conclusion The results of this study show heterogeneous associations among prices and intake within and across countries. Policymakers should consider these heterogeneous effects as they address global nutrition and health challenges.</p> |
| <b>Introduction</b> |                                                                                                         |                                                                                                                                                                                                                                                                                                                                                                                                                                                                                                                                                                                                                                                                                                                                                                                                                                                                                                                                                                                                                                                                                                                                                                                                                                                                                                                                                                                                                                                                                                                                                                                                                                                                                                                                                                                                   |

| Topic                                | No. | Item                                                                                                                            | Location where item is reported                                                                                                                                                                                                                                                                                                                                                                                                                                                                                                                                                                                                                                                                                                                                                                                                                    |
|--------------------------------------|-----|---------------------------------------------------------------------------------------------------------------------------------|----------------------------------------------------------------------------------------------------------------------------------------------------------------------------------------------------------------------------------------------------------------------------------------------------------------------------------------------------------------------------------------------------------------------------------------------------------------------------------------------------------------------------------------------------------------------------------------------------------------------------------------------------------------------------------------------------------------------------------------------------------------------------------------------------------------------------------------------------|
| <b>Background and objectives</b>     | 3   | Give the context for the study, the study question, and its practical relevance for decision making in policy or practice.      | To help address these knowledge gaps, this investigation assessed how price and country income relate to SF intake. We used nationally representative intake estimates from the 2018 Global Dietary Database to estimate how per capita income and prices jointly relate to SF intake by age and sex globally. Since nutrients are found in food, examinations of nutrient demand must consider food source demand, with price and income as explanatory variables.(15-17) Using price and expenditure data from the World Bank International Comparison Program, we constructed a global price series based on three food categories: meat, dairy, and oils and fats. This series sufficiently explained SF intake differences across countries and allowed for assessing the relationships of per capita income and price in each food category. |
| <b>Methods</b>                       |     |                                                                                                                                 |                                                                                                                                                                                                                                                                                                                                                                                                                                                                                                                                                                                                                                                                                                                                                                                                                                                    |
| <b>Health economic analysis plan</b> | 4   | Indicate whether a health economic analysis plan was developed and where available.                                             | No. This does not apply.                                                                                                                                                                                                                                                                                                                                                                                                                                                                                                                                                                                                                                                                                                                                                                                                                           |
| <b>Study population</b>              | 5   | Describe characteristics of the study population (such as age range, demographics, socioeconomic, or clinical characteristics). | Secondary data were used for this analysis. Intake data by age, sex, and country were obtained from the 2018 Global Dietary Database. These data were then linked to global price data for select food groups from the World Bank International Comparison Program and income data from the World Development Indicators Databank (World Bank). We estimated intake responsiveness to income and prices, accounting for differences by world region, age, and sex.                                                                                                                                                                                                                                                                                                                                                                                 |
| <b>Setting and location</b>          | 6   | Provide relevant contextual information that may influence findings.                                                            | Global study - 160 countries.                                                                                                                                                                                                                                                                                                                                                                                                                                                                                                                                                                                                                                                                                                                                                                                                                      |
| <b>Comparators</b>                   | 7   | Describe the interventions or strategies being compared and why chosen.                                                         | Economic analysis using secondary data. This does not apply.                                                                                                                                                                                                                                                                                                                                                                                                                                                                                                                                                                                                                                                                                                                                                                                       |

| Topic                                                   | No. | Item                                                                                                            | Location where item is reported                                                                                                                                                                                                                                                                                                                                                                                                                                                                                                                 |
|---------------------------------------------------------|-----|-----------------------------------------------------------------------------------------------------------------|-------------------------------------------------------------------------------------------------------------------------------------------------------------------------------------------------------------------------------------------------------------------------------------------------------------------------------------------------------------------------------------------------------------------------------------------------------------------------------------------------------------------------------------------------|
| <b>Perspective</b>                                      | 8   | State the perspective(s) adopted by the study and why chosen.                                                   | <ul style="list-style-type: none"> <li>It is generally understood that affordability is an important driver of food demand, underscoring the importance of income and prices in dietary choices. Research has confirmed significant associations among income, prices, and food demand. What is missing, however, is a better understanding of how price and income influence actual nutrient intake, particularly on a global scale, and how price and income relationships could vary by demographics within and across countries.</li> </ul> |
| <b>Time horizon</b>                                     | 9   | State the time horizon for the study and why appropriate.                                                       | 2017-2018                                                                                                                                                                                                                                                                                                                                                                                                                                                                                                                                       |
| <b>Discount rate</b>                                    | 10  | Report the discount rate(s) and reason chosen.                                                                  | N/A                                                                                                                                                                                                                                                                                                                                                                                                                                                                                                                                             |
| <b>Selection of outcomes</b>                            | 11  | Describe what outcomes were used as the measure(s) of benefit(s) and harm(s).                                   | N/A                                                                                                                                                                                                                                                                                                                                                                                                                                                                                                                                             |
| <b>Measurement of outcomes</b>                          | 12  | Describe how outcomes used to capture benefit(s) and harm(s) were measured.                                     | N/A                                                                                                                                                                                                                                                                                                                                                                                                                                                                                                                                             |
| <b>Valuation of outcomes</b>                            | 13  | Describe the population and methods used to measure and value outcomes.                                         | See 5.                                                                                                                                                                                                                                                                                                                                                                                                                                                                                                                                          |
| <b>Measurement and valuation of resources and costs</b> | 14  | Describe how costs were valued.                                                                                 | Income values were in \$US.                                                                                                                                                                                                                                                                                                                                                                                                                                                                                                                     |
| <b>Currency, price date, and conversion</b>             | 15  | Report the dates of the estimated resource quantities and unit costs, plus the currency and year of conversion. | Prices were indexes where World = 100.                                                                                                                                                                                                                                                                                                                                                                                                                                                                                                          |



| Topic                                                                        | No. | Item                                                                                                                                                                          | Location where item is reported                                                                                                                                                                                                                                                                                                                                                                                                                                                                                                                                           |
|------------------------------------------------------------------------------|-----|-------------------------------------------------------------------------------------------------------------------------------------------------------------------------------|---------------------------------------------------------------------------------------------------------------------------------------------------------------------------------------------------------------------------------------------------------------------------------------------------------------------------------------------------------------------------------------------------------------------------------------------------------------------------------------------------------------------------------------------------------------------------|
| <b>Rationale and description of model</b>                                    | 16  | If modelling is used, describe in detail and why used. Report if the model is publicly available and where it can be accessed.                                                | To estimate SF intake demand, we used a semi-log functional form that has been proven to be consistent with economic theory and rational consumer behavior.(25, 26) Many studies have used a double-log form.(27) However, a problem with the double-log form is that significant intake differences across subgroups can be lost in log conversions. A semi-log relationship allowed for a better assessment of subgroup effects on intake responsiveness.                                                                                                               |
| <b>Analytics and assumptions</b>                                             | 17  | Describe any methods for analysing or statistically transforming data, any extrapolation methods, and approaches for validating any model used.                               | Econometric analysis assuming country clusters.                                                                                                                                                                                                                                                                                                                                                                                                                                                                                                                           |
| <b>Characterising heterogeneity</b>                                          | 18  | Describe any methods used for estimating how the results of the study vary for subgroups.                                                                                     | Econometric analysis assuming country clusters.                                                                                                                                                                                                                                                                                                                                                                                                                                                                                                                           |
| <b>Characterising distributional effects</b>                                 | 19  | Describe how impacts are distributed across different individuals or adjustments made to reflect priority populations.                                                        | Intake differences due to price were highly significant, with a one percent increase in price associated with lower SF intake (% energy/d) of about 4.3 percentage points. Results indicated that the highest price sensitivity was due to meat consumption. We also find significant differences across regions. In high-income countries, median (age 40) intake reductions were e 1.4, 0.8, and 0.2 percentage points, given a one-percent increase in the price of meat, dairy, and oils and fats, respectively. Intake differences due to income were insignificant. |
| <b>Characterising uncertainty</b>                                            | 20  | Describe methods to characterise any sources of uncertainty in the analysis.                                                                                                  | Not applicable                                                                                                                                                                                                                                                                                                                                                                                                                                                                                                                                                            |
| <b>Approach to engagement with patients and others affected by the study</b> | 21  | Describe any approaches to engage patients or service recipients, the general public, communities, or stakeholders (such as clinicians or payers) in the design of the study. | N/A                                                                                                                                                                                                                                                                                                                                                                                                                                                                                                                                                                       |
| <b>Results</b>                                                               |     |                                                                                                                                                                               |                                                                                                                                                                                                                                                                                                                                                                                                                                                                                                                                                                           |



| Topic                                                                       | No. | Item                                                                                                                                                                     | Location where item is reported |
|-----------------------------------------------------------------------------|-----|--------------------------------------------------------------------------------------------------------------------------------------------------------------------------|---------------------------------|
| <b>Study parameters</b>                                                     | 22  | Report all analytic inputs (such as values, ranges, references) including uncertainty or distributional assumptions.                                                     | See Results                     |
| <b>Summary of main results</b>                                              | 23  | Report the mean values for the main categories of costs and outcomes of interest and summarise them in the most appropriate overall measure.                             | See Results                     |
| <b>Effect of uncertainty</b>                                                | 24  | Describe how uncertainty about analytic judgments, inputs, or projections affect findings. Report the effect of choice of discount rate and time horizon, if applicable. | N/A                             |
| <b>Effect of engagement with patients and others affected by the study</b>  | 25  | Report on any difference patient/service recipient, general public, community, or stakeholder involvement made to the approach or findings of the study                  | N/A                             |
| <b>Discussion</b>                                                           |     |                                                                                                                                                                          |                                 |
| <b>Study findings, limitations, generalisability, and current knowledge</b> | 26  | Report key findings, limitations, ethical or equity considerations not captured, and how these could affect patients, policy, or practice.                               | Discussion                      |
| <b>Other relevant information</b>                                           |     |                                                                                                                                                                          |                                 |
| <b>Source of funding</b>                                                    | 27  | Describe how the study was funded and any role of the funder in the identification, design, conduct, and reporting of the analysis                                       | End of manuscript               |
| <b>Conflicts of interest</b>                                                | 28  | Report authors conflicts of interest according to journal or International Committee of Medical Journal Editors requirements.                                            | End of manuscript               |

1  
2  
3 *From:* Husereau D, Drummond M, Augustovski F, et al. Consolidated Health Economic  
4 Evaluation Reporting Standards 2022 (CHEERS 2022) Explanation and Elaboration: A  
5 Report of the ISPOR CHEERS II Good Practices Task Force. Value Health 2022;25.  
6 [doi:10.1016/j.jval.2021.10.008](https://doi.org/10.1016/j.jval.2021.10.008)  
7  
8  
9  
10  
11  
12  
13  
14  
15  
16  
17  
18  
19  
20  
21  
22  
23  
24  
25  
26  
27  
28  
29  
30  
31  
32  
33  
34  
35  
36  
37  
38  
39  
40  
41  
42  
43  
44  
45  
46  
47  
48  
49  
50  
51  
52  
53  
54  
55  
56  
57  
58  
59  
60

For peer review only
