# Supplementary material for: How prices and income influence global patterns in saturated fat intake by age, sex and world region: a cross-sectional analysis of 160 countries
Source: PubMed Central journal article supplement — BMJ Open. 2024 Jan 22;14(1):e074562. doi: 10.1136/bmjopen-2023-074562 (PMC10806819; doi:10.1136/bmjopen-2023-074562), 2024-01-22
Supplement: bmjopen-2023-074562supp001.pdf [file bmjopen-2023-074562supp001.pdf]

## Supplemental Appendix

**Supplemental Table 1. Countries included in study by defined region**

| Region                                                                      | Countries                                                                                                                                                                                                                                                                                                                                                                                                                                                        |
|-----------------------------------------------------------------------------|------------------------------------------------------------------------------------------------------------------------------------------------------------------------------------------------------------------------------------------------------------------------------------------------------------------------------------------------------------------------------------------------------------------------------------------------------------------|
| Southeast Asia, East Asia, and High-Income Asia Pacific (ASIA) 14 countries | Brunei Darussalam, Cambodia, China, Fiji, Indonesia, Japan, Laos, Malaysia, Myanmar, Philippines, Singapore, South Korea, Thailand, and Vietnam.                                                                                                                                                                                                                                                                                                                 |
| Central Europe, Eastern Europe, and Central Asia (CEE) 27 countries         | Albania, Armenia, Azerbaijan, Belarus, Bosnia and Herzegovina, Bulgaria, Croatia, Czech Republic, Estonia, Georgia, Hungary, Kazakhstan, Kyrgyz Republic, Latvia, Lithuania, Macedonia, Moldova, Mongolia, Montenegro, Poland, Romania, Russia, Serbia, Slovak Republic, Slovenia, Tajikistan, and Ukraine.                                                                                                                                                      |
| Latin America and the Caribbean (LAC) 29 countries                          | Antigua and Barbuda, Argentina, Bahamas, Barbados, Belize, Bolivia, Brazil, Chile, Colombia, Costa Rica, Dominica, Dominican Republic, Ecuador, El Salvador, Grenada, Guyana, Haiti, Honduras, Jamaica, Mexico, Nicaragua, Panama, Paraguay, Peru, St. Lucia, St. Vincent and Grenadines, Suriname, Trinidad and Tobago, and Uruguay.                                                                                                                            |
| Middle East and North Africa (MENA) 17 countries                            | Algeria, Bahrain, Egypt, Iran, Iraq, Israel, Jordan, Kuwait, Morocco, Oman, Qatar, Saudi Arabia, Tunisia, Turkey, United Arab Emirates, and West Bank and Gaza.                                                                                                                                                                                                                                                                                                  |
| South Asia (S-ASIA) – 7 countries                                           | Bangladesh, Bhutan, India, Maldives, Nepal, Pakistan, and Sri Lanka.                                                                                                                                                                                                                                                                                                                                                                                             |
| Sub-Saharan Africa (SSA) 43 countries                                       | Angola, Benin, Botswana, Burkina Faso, Burundi, Cabo Verde, Cameroon, Central African Republic, Chad, Comoros, Congo DR, Congo, Côte d'Ivoire, Djibouti, Equatorial Guinea, Eswatini, Ethiopia, Gabon, Gambia, Ghana, Guinea, Guinea Bissau, Kenya, Lesotho, Liberia, Madagascar, Malawi, Mali, Mauritania, Mauritius, Mozambique, Namibia, Niger, Nigeria, Rwanda, São Tomé and Príncipe, Senegal, Seychelles, Sierra Leone, Sudan, Tanzania, Togo, and Uganda. |
| High Income/Rest of World (HIC) 24 countries                                | Australia, Austria, Belgium, Canada, Cyprus, Denmark, Finland, France, Germany, Greece, Iceland, Ireland, Italy, Luxembourg, Malta, Netherlands, New Zealand, Norway, Portugal, Spain, Sweden, Switzerland, United Kingdom, and United States.                                                                                                                                                                                                                   |

**Supplemental Table 2. Saturated fat intake estimates using country level data (n = 160)**

|                         | Model 1         | Model 2        | Model 3         | Model 4         |
|-------------------------|-----------------|----------------|-----------------|-----------------|
| Constant                | 13.66 (0.46)*** | 1.03 (1.75)    | 10.81 (0.23)*** | 12.05 (2.87)*** |
| ASIA                    | -1.19 (0.76)    |                |                 | -0.66 (0.81)    |
| CEE                     | -1.36 (0.63)**  |                |                 | -1.16 (0.67)*   |
| LAC                     | -4.07 (0.62)*** |                |                 | -4.26 (0.74)*** |
| MENA                    | -3.43 (0.73)*** |                |                 | -2.85 (0.77)*** |
| S-ASIA                  | -7.41 (0.97)*** |                |                 | -6.34 (1.10)*** |
| SSA                     | -4.07 (0.58)*** |                |                 | -3.65 (0.90)*** |
| ln(Y)                   |                 | 1.03 (0.18)*** |                 | 0.14 (0.26)     |
| ln(P)                   |                 |                | -3.90 (1.94)**  | -4.33 (1.89)**  |
| Adjusted R <sup>2</sup> | 0.39            | 0.16           | 0.02            | 0.41            |

Dependent variable is saturated fat intake measured in % energy/d. Robust standard errors are in (parenthesis). \* $p \leq 0.10$ ; \*\* $p \leq 0.05$ ; \*\*\* $p \leq 0.01$ . East and Southeast Asia (ASIA), Central and Eastern Europe and Central Asia (CEE), Latin America and Caribbean (LAC), Middle East and North Africa (MENA), South Asia (S-ASIA), and Sub-Saharan Africa (SSA). Y is real GDP per capita, purchasing-power-parity adjusted. P is an inflation adjusted price index for meats, dairy products and eggs, and oils and fats.

### Income, Price, and Expenditure Data Across Countries

Supplemental Figures 1 – 3 contain box plots by region for the country-specific explanatory variables.

**Supplemental Figure 1** shows real GDP per capita (PPP) for the seven regions in our study. The highest GDP region is High-Income Countries, which is unsurprising. The median income for High-Income Countries was \$51,432 per person. In contrast, Sub-Saharan Africa had the smallest real GDP per capita, with a median value of \$3,147.

**Supplemental Figure 2** shows expenditure shares for the contributing food categories: meats, dairy, and oils and fats by region. Food expenditure shares were derived from the World Bank International Comparison Program (ICP) which allows for global spending comparisons by standardizing expenditures to a common currency (U.S. Dollars). Across regions, meat expenditures were the highest food expenditure category, except for South Asia. In South Asia, the median dairy food expenditure share was the highest at 0.47 and the interquartile range (IQR) was 0.34 to 0.60. Asia, Latin America and Caribbean, and Sub-Saharan Africa were the regions with the highest median expenditures for meats at 0.65 and an IQR from 0.55 to 0.74. South Asia has the lowest meat expenditure share at 0.31 with an IQR from 0.16 to 0.48. Apart from South Asia, dairy expenditure shares represented the second highest expenditure shares across regions. Oils and fats account for the smallest share of food expenditures compared to the other food categories for all regions.

**Supplemental Figure 3** shows the price indexes for meat, dairy, and oil and fats, and the weighted average price index (weighted based on the expenditures in Supplemental Figure 2) by region. The weighted average food price index is the sum of each price index times the expenditure share for the corresponding food category. Most regions exhibit relatively similar values across price index categories and shorter “whiskers” include Central and Eastern Europe, Middle East and North Africa, and South Asia. Alternatively, some regions (High-Income Countries, Latin America and Caribbean, and Sub-Saharan Africa) exhibit a greater range between the IQR and maximum and minimum values and greater variation in prices. For example, in the Latin American and Caribbean region, the dairy price index has a median value of 134.49 and IQR of 98.60 to 156.59. In contrast, the Central and Eastern Europe region has a dairy price index median value of 86.58 and IQR range of 75.84 to 93.50.

Supplemental Figure 1. Real GDP Per Capita (PPP) by Region

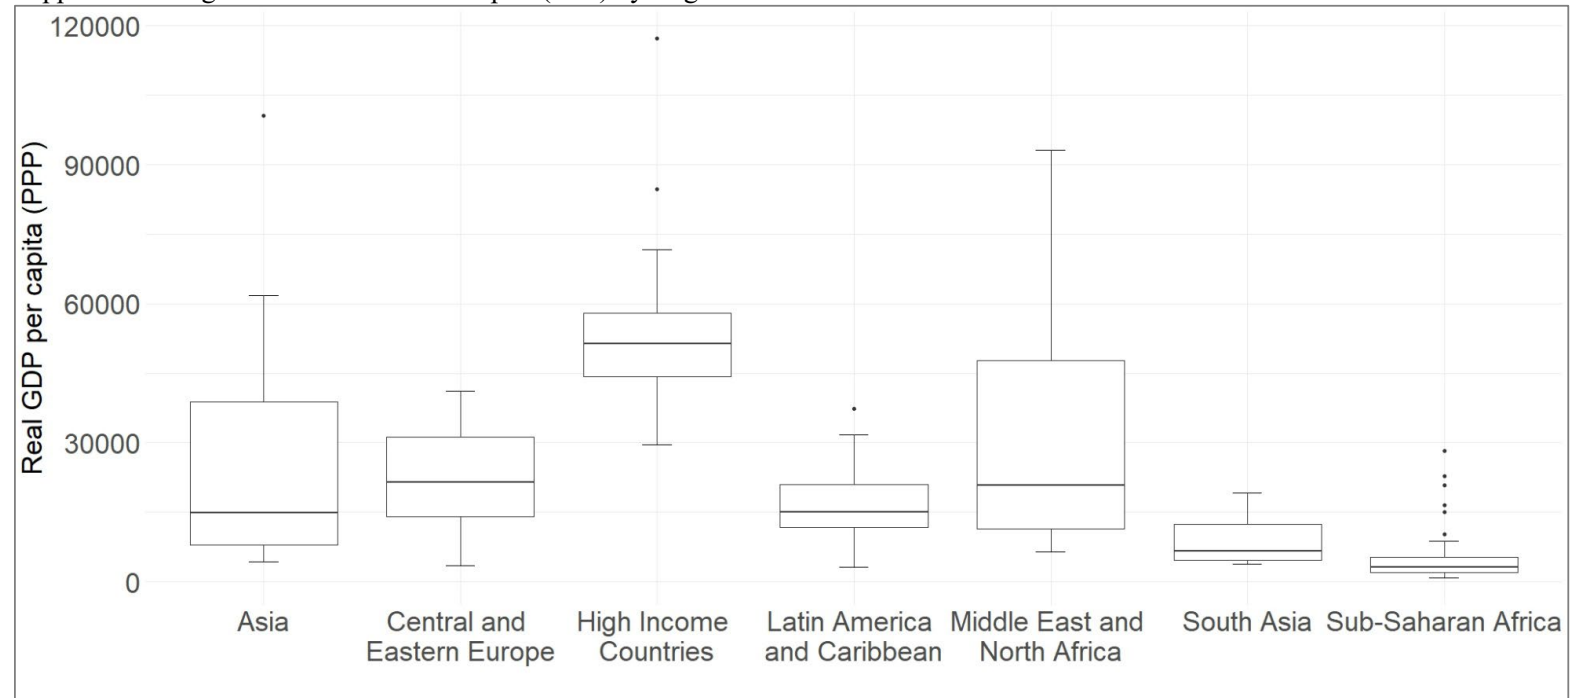

Source: Authors' estimates using income data from the World Bank Development Indicators.

Supplemental Figure 2. Food Expenditure Shares by Region

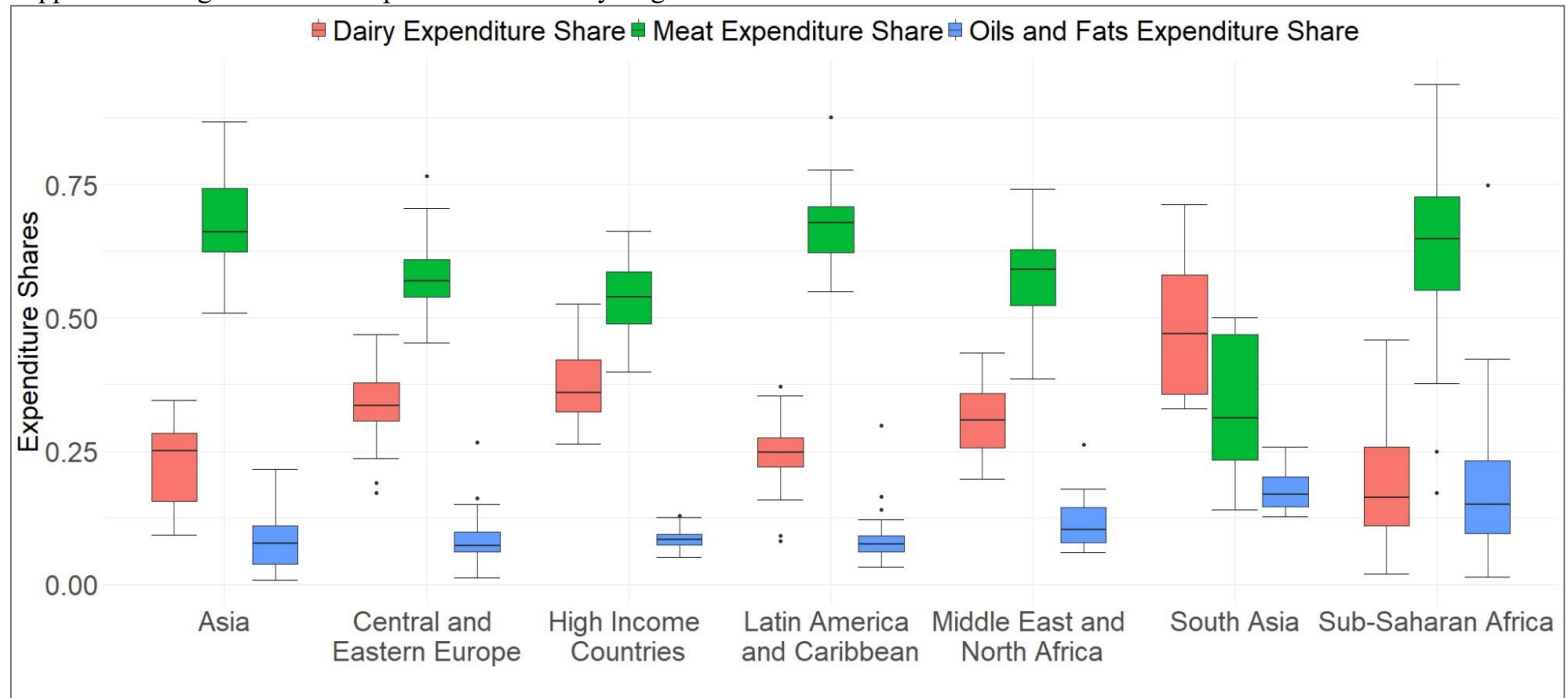

Source: Authors' estimates using income data from the World Bank International Comparison Program.

Supplemental Figure 3. Price Indexes for each Food Category and Weighted Average by Region

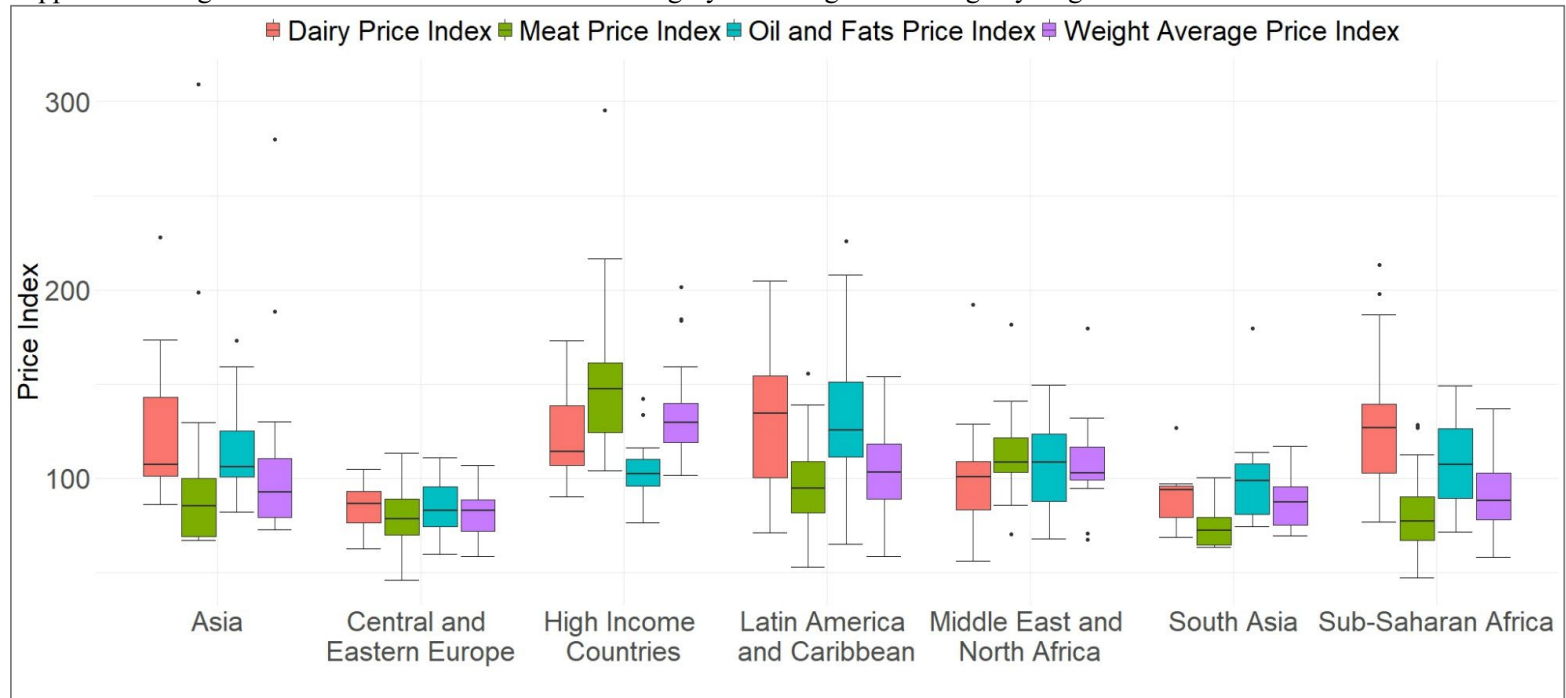

Source: Authors' estimates using income data from the World Bank International Comparison Program.

## Global Dietary Database Corresponding Members

Pamela Abbott, Director of the Centre for Global Development, University of Aberdeen, UK; Morteza Abdollahi, National Nutrition and Food Technology Research Institute (NNFTRI): SBMU; Parvin Abedi, Menopause Andropause Research Center, Ahvaz Jundishapur University of Medical Sciences; Suhad Abumweis, Al Ain University, Abu Dhabi, UAE; Linda Adair; Mohannad Al Nsour, Eastern Mediterranean Public Health Network: EMPHNET; Iftikhar Alam, BKUC.edu.pk; Nasser Al-Daghri and Dr. Shaun Sabico, King Saud University, Saudi Arabia; Nawal Ai, alHamad, Public Authority For Food and Nutrition, Kuwait; Suad Al-Hooti, Kuwait Institute for Scientific Research; Eman Alissa, King Abdulaziz University; Sameer Al-Zenki; Simon Anderson, University of Manchester; Karim Anzid, Cadi Ayyad University; Carukshi Arambepola, Faculty of Medicine, University of Colombo, Sri Lanka; Mustafa Arici, Hacettepe University Faculty of Medicine; Joanne Arsenault, FHI Solutions; Renzo Ascjak; Lajos Biró; Noël Barengo, Herbert Wetheim College of Medicine; Simon Barquera, Juan Rivera Dommarco, Daniel Illescas-Zarate, Luz Maria Sánchez-Romero, Sonia Rodriguez Ramirez, and Ivonne Ramirez Silva, National Institute of Public Health (INSP), Mexico; Murat Bas, Acibadem University; Wulf Becker; Sigrid Beer-Borst; Per Bergman, Anna Karin Lindroos, Jessica Petrelius Sipinen, and Lotta Moraeus, Swedish National Food Agency; Sesikeran Boindala, National Institute of Nutrition India; Pascal Bovet, University Center for Primary Care and Public Health (Unisanté), Lausanne, Switzerland, and Ministry of Health, Seychelles; Debbie Bradshaw; Noriklil Bukhary Ismail Bukhary, Ministry of Health (Malaysia); Kanitta Bundhamcharoen; Mauricio T. Caballero, Fundacion INFANT and Consejo Nacional De Investigaciones Cientificas y Tecnicas (CONICET); Neville Calleja, Directorate for Health Information & Research; Xia Cao; Mario Capanzana, Food and Nutrition Research Institute, Department of Science and Technology; Jan Carmikle, Senior Intellectual Property Office; Katia Castetbon, Institut de Veille Sanitaire; Michelle Castro, Departamento de Alimentação Escolar; Corazon Cerdena; Hsing-Yi Chang, National Health Research Institutes; Karen Charlton; Yu Chen, NYU School of Medicine; Shashi Chiplonkar, HC Jehangir Medical Research Institute, Pune India; Yoonsu Cho, Korea University; Khun-Aik Chuah; Simona Costanzo, Marialaura Bonaccio, and Licia Iacoviello, IRCCS INM Neuromed; Melanie Cowan; Albertino Damasceno, Faculty of Medicine, Eduardo Mondlane University, Maputo, Mozambique; Saeed Dastgiri, Tabriz University of Medical Sciences; Stefaan De Henauw and Carl Lachat, Ghent University, Belgium; Karin DeRidder, Belgian Public Health Institute; Eric Ding, Harvard School of Public Health; Rokiah Don; Charmaine Duante; Vesselka Duleva, National Center for Public Health, Sofia, Bulgaria; Samuel Duran Aguero, Universidad San Sebastian, Chile; Veena Ekbote, Hirabai Cowasji Jehangir Medical Research Institute, Jehangir Hospital, Pune, India; Jalila El Ati, National Institute of Nutrition and Food Technology & SURVEN RL; Alison Eldridge, Nestle Research Center; Tatyana El-kour and Laetitia Nikiema, World Health Organization (WHO); Ibrahim Elmadfa, University of Vienna; Helene Enghardt Barbieri; Alireza Esteghamati, Tehran University of Medical Sciences; Zohreh Etemad, Dutch National Institute for Public Health and the Environment (RIVM); Fariza Fadzil, Ministry of Health, Malaysia; Farshad Farzadfar; Mei Fen Chan; Anne Fernandez, Perdana University, Royal College of Surgeons in Ireland; Dulitha Fernando; Regina Fisberg, University of Sao Paulo, Brazil; Simon Forsyth, The University of Queensland School of Public Health; Edna Gamboa Delgado, Fundacion Cardiovascular de Colombia; Didier Garriguet, Statistics Canada; Jean-Michel Gaspoz; Dorothy Gauci; Johanna M. Geleijnse, Wageningen University; Brahmam Ginnela;

Giuseppe Grosso, Department of Biomedical and Biotechnological Sciences, University of Catania, Italy; Idris Guessous, Geneva University Hospitals; Martin Gulliford, King's College London; Ingibjorg Gunnarsdottir and Inga Thorsdottir, University of Iceland; Holmfridur Thorgeirsdottir, Directorate of Health, Iceland; Wilbur Hadden; Aida Hadziomeragic, Institute of Public Health of Federation of Bosnia and Herzegovina; Christian Haerperfer; Jemal Haidar Ali, Addis Ababa University; Rubina Hakeem, Ziauddin University Karachi; Aminul Haque, University of Dhaka; Maryam Hashemian, Tehran University of Medical Sciences and Uta University; Rajkumar Hemalatha, Avula Laxmaiah, Indrapal Meshram, Harikumar Rachakulla, and Nimmathota Arlappa ICMR-National Institute of Nutrition, Hyderabad; Sigrun Henjum, Oslo and Akerhus University College; Hristo Hinkov, National Center of Public Health and Analyses (NCPHA); Zaiton Hjadaud; Daniel Hoffman, Rutgers University; Beth Hopping; Anahita Houshiar-rad, National Nutrition & Food Technology Research Ins; Yao-Te Hsieh, Institute of Biomedical Sciences, Academia Sinica, Taipei, Taiwan; Shu-Yi Hung; Inge Huybrechts, International Agency for Research on Cancer; Nahla Chawkat Hwalla, American University of Beirut; Nayu Ikeda; Manami Inoue; Olof Jonsdottir; Hamid Jan Bin Jan Mohamed, Universiti Sains Malaysia; Chandrashekar Janakiram, Amrita School of Dentistry; Ranil Jayawardena, University of Colombo; Rajesh Jeewon, University of Mauritius; Nattinee Jitnarin; Lars Johansson; Ola Kally; Mirnalini Kandiah; Tilakavati Karupaiah, National University of Malaysia; Lital Keinan-Boker, Rebecca Goldsmith, and Tal Shimony, Israel Center for Disease Control; Roya Kelishadi, Research Institute for Primordial Prevention of NCD, Isfahan University of Medical Sciences; Anuradha Khadilkar, Hirabai Cowasji Jehangir Medical Research Institute; Cho-il Kim, Korea Health Industry Development Institute; Eda Koksall, Gazi University; Jurgen Konig, University of Vienna, Department of Nutritional Sciences; Liisa Korkalo, Riitta Freese, and Maijaliisa Erkkola, University of Helsinki; Eva Roos, University of Helsinki, Department of Food and Nutrition; Jeremy Koster, University of Cincinnati; Irina Kovalskys, ICCAS (Instituto para la cooperacion cientifica en ambiente y salud), Argentina; Anand Krishnan, All India Institute of Medical Sciences; Herculina Kruger, North-West University, Potchefstroom South Africa; Rebecca Kuriyan-Raj, St John's Research Institute; Kyungwon Oh, Sanghui Kweon and Sihyun Park, Korea Disease Control and Prevention Agency (KDCA); Yuen Lai; Pulani Lanerolle, University of Colombo, Sri Lanka; Indu Waidyatilaka, University of Colombo, Sri Lanka; Catherine Leclercq; Meei-Shyuan Lee; Hae-Jeung Lee, Eulji University; J Lennert Veerman, The University of Queensland; Lydia Lera Marques, Unidad de Nutricion Publica-Professor Asociado; Yanping Li, Harvard School of Public Health; Jaana Lindström; Annie Ling; Nur Indrawaty Lipoeto, Andalas University; Patricio Lopez-Jaramillo, FOSCAL and UDES; Amy Luke, Loyola University Chicago; Widjaja Lukito; Nuno Lunet, Faculty of Medicine, University of Porto, Portugal; Carla Lopes and Milton Severo, Faculty of Medicine/ Institute of Public Health, University of Porto, Portugal; Duarte Torres, Faculty of Nutrition and Food Sciences / Institute of Public Health, University of Porto, Portugal; Elisabette Lupotto, Aida Turrini, Stefania Sette, and Raffaella Piccinelli, CREA-Alimenti e Nutrizione; Guansheng Ma; Yi Ma; Zaleha Abdullah Mahdy, National University of Malaysia (UKM); Reza Malekzadeh, Digestive Disease Research Institute, Tehran University of Medical Sciences; Wan Manan, Universiti Sains Malaysia; Dirce Marchioni, University of Sao Paulo; Pedro Marques-Vidal, Lausanne University Hospital (CHUV) and University of Lausanne, Switzerland; Yves Martin-Prevel, Institut de Recherche pour le Developpement; Hajah Masni Ibrahim; Angie Mathee; Yasuhiro Matsumura, Bunkyo University, Faculty of Health and Nutrition; Paramita Mazumdar, Centre For Media Studies; Abla M. Sibai, Faculty of Health Sciences - American



University of Beirut; Anjum Memon, Brighton and Sussex Medical School, UK; Gert Mensink, Robert Koch Institute; Alexa Meyer, University of Vienna, Austria; Parvin Mirmiran, Research Institute for Endocrine Sciences, Shahid Beheshti University of Medical Sciences; Masoud Mirzaei, Yazd Cardiovascular Research Centre, Shahid Sadoughi University of Medical Sciences; Puneet Misra, All India Institute of Medical Sciences; Anoop Misra, Fortis CDOC Center for Excellence for Diabetes; Claudette Mitchell and David Balfour, University of the Southern Caribbean; Noushin Mohammadifard, Nizal Sarrafzadegan, Moses Mwangi, and Maryam Maghroun, Isfahan Cardiovascular Research Center, Cardiovascular Research Institute, Isfahan University of Medical Sciences; Fatemeh Mohammadi-Nasrabadi, National Nutrition and Food technology Research Institute; Zalilah Mohd Shariff, Universiti Putra Malaysia; Foong Ming Moy, University of Malaya; Abdulrahman Musaiger, Arab Center for Nutrition; Elizabeth Mwaniki, The Technical University of Kenya; Jannicke Myhre; Balakrishna Nagalla, National Institute of Nutrition, Hyderabad; Androniki Naska; Augustin Nawidimbamba Zeba, Institut de Recherche en sciences de la Sante; Shu Wen Ng, University of North Carolina at Chapel Hill; Le Tran Ngoan, Hanoi Medical University; Sina Noshad, Tehran University of Medical Sciences; Angelica Ochoa, Universidad de Cuenca; Marga Ocke, Dutch National Institute for Public Health and the Environment: RIVM; Jillian Odenkirk; Mariana Oleas, Universidad Tecnica del Norte; Sonia Olivares, Institute of Nutrition and Food Technology (INTA), University of Chile; Philippos Orfanos; Johana Ortiz-Ulloa, Cuenca University; Johanna Otero, Fundacion Oftalmologica de Santander (FOSCAL); Marja-Leena Ovaskainen; Mohammadreza Pakseresht, University of Alberta; Cristina Palacios, Florida International University; Pam Palmer; Wen-Harn Pan, Institutes of Biomedical Sciences, Academia Sinica; Demosthenes Panagiotakos, Harokopio University; Rajendra Parajuli, Tribhuvan University; Gulden Pekcan; Stefka Petrova, National Centre of Public Health and Analyses; Noppawan Piaseu, Mahidol University; Christos Pitsavos; Kalpagam Polasa, National Institute of Nutrition; Luz Posada, Universidad de Antioquia; Farhad Pourfarzi, Ardabil University of Medical Sciences; Alan Martin Preston, Univ Puerto Rico-Med Sci Dept Biochemistry; Ingrid Rached, Centro de Atencion Nutricional Antimano (CANIA); Ali Reza Rahbar; Colin Rehm; Almut Richter, Robert Koch Institute; Leanne Riley; Benoit Salanave; Norie Sawada and Shoichiro Tsugane, National Cancer Center Institute for Cancer Control, Japan; Makiko Sekiyama, Graduate Program in Sustainability Science Global Leadership Initiative (GPSS-GLI), The University of Tokyo; Rusidah Selamat; Khadijah Shamsuddin, Universiti Kebangsaan Malaysia Medical Centre; Sangita Sharma, University of Alberta; Harri Sinkko; Isabelle Sioen; Ivan Sisa, Universidad San Francisco de Quito; Sheila Skeaff, University of Otago; Laufey Steingrimsdottir; Tor Strand, University of Bergen; Milton Fabian Suarez-Ortega, University of Edinburgh; Sumathi Swaminathan, St John's Research Institute; Gillian Swan; Elzbieta Sygnowska; Maria Szabo; Lucjan Szponar, National Food and Nutrition Institute; Ilse Khouw and Swee Ai Ng, FrieslandCampina, The Netherlands; Heli Tapanainen, The National Institute for Health and Welfare (THL); Reema Tayyem, Qatar University and University of Jordan; Bemnet Tedla; Alison Tedstone; Robert Templeton; Celine Termote, Bioversity International; Anastasia Thanopoulou, Diabetes Center, 2nd Department of Internal Medicine, Athens University, Greece; Dimitrios Trichopoulos; Antonia Trichopoulou, Hellenic Health Foundation and University of Athens; Coline van Oosterhout; Erkki Vartiainen; Suvi Virtanen, National Institute for Health and Welfare; Peter Vollenweider; Marieke Vossenaar, CeSSIAM in Guatemala; Eva Warensjo Lemming, Risk and Benefit Assessment Department, Swedish Food Agency; Anna Waskiewicz, Department of CVD Epidemiology, Prevention and Health Promotion, Institute of Cardiology, Warsaw, Poland;

Lothar Wieler, Robert Koch Institute; Suh Wu; Roseyati Yaakub; Mabel Yap; Safiah Yusof; Sahar Zaghoul, National Nutrition Institute, Egypt; Gábor Zajkás; Maria Elisa Zapata, CESNI; Khairul Zarina; Fatemeh Vida Zohoori, Teesside University; Mark Manary, Washington University in St. Louis; Zipporah Bukania and Yeri Kombe, Kenya Medical Research Institute; Sirje Vaask, Tallinn University; Julie Long, K. Michael Hambidge, Tshilenge S. Diba, Shivanand C. Mastiholi, Umber S. Khan, and Gabriela Tejada, University of Colorado Anschutz Medical Campus; Eha Nurk, Estonian National Institute for Health Development; Keiu Nelis; Ute Nöthlings and Ute Alexy, University of Bonn, Department of Nutrition and Food Sciences; Cornelia Tudorie and Anca Nicolau, University Dunarea de Jos, Galati, Romania; Amanda de Moura Souza, Institute of Studies in Public Health, Federal University of Rio de Janeiro (UFRJ); Alan de Brauw, Mourad Moursi, International Food Policy Research Institute (IFPRI); Alicia Roviroso, Centro de Estudios sobre Nutrición Infantil; Carol Henry, Getahun Ersino, and Gordon Zello, University of Saskatchewan, Saskatoon, Canada; Chanthaly Luangphaxay, Daovieng Douangvichit, and Latsamy Siengsounthone, Lao Tropical and Public Health Institute; Christine Hotz; Constance Rybak, Leibniz Centre for Agricultural Landscape Research; Corina Aurelia Zugravu, University of Medicine and Pharmacy Carol Davila Bucharest Romania; Donka Baykova, Medical Center Markovs; Elizabeth Yakes-Jimenez, The University of New Mexico; Gudrun B. Keding, University of Goettingen, Germany; Lydiah M. Waswa, Egerton University, Kenya; Irmgard Jordan, Justus Liebig University Giessen; J.V. Meenakshi, Delhi School of Economics, University of Delhi; Josie Desnacido and Imelda Angeles Agdeppa, Food and Nutrition Research Institute (DOST-FNRI); Justin Chileshe and Sydney Mwanza, Tropical Diseases Research Centre; Kalyana Sundram, Malaysian Palm Oil Council (MPOC); Laila Eleraky and Wolfgang Stuetz, University of Hohenheim; Lalka Rangelova, National Centre of Public Health and Analyses; Lilian Aluso, Julia Boedecker, and Francis Oduor, Consultative Group on International Agricultural Research (CGIAR); Lluís Serra-Majem, University of Las Palmas de Gran Canaria (ULPGC), Canary Islands, Spain; Tamene Taye Asayehu, College of Applied Sciences, Department of Food Science and Applied Nutrition, Addis Ababa Science and Technology University; Veronika Janská, Public Health Authority of the Slovak Republic; Ward Siamusantu, National Food and Nutrition Commission; Ken Brown, University of California, Davis.
